# Supplementary material
Source: PubMed Central journal article supplement (PMC5888224)
Supplement: en.2017-03259.sf1.pdf [file en.2017-03259.sf1.pdf]

1 **Supplemental Figures**

2

3 Supplemental Figure 1. Verification of *Calcr*<sup>cre</sup> mouse strain. Representative ISH

4 images showing *Calcr* (green) and *Cre* (red) signal in the arcuate nucleus of wildtype

5 (**A**) and *Calcr*<sup>cre</sup> (**B**) mice. **A'** and **B'** are more magnified images of the area indicated by

6 the dotted rectangles in **A** and **B**. Blue is DAPI. Scale bar = 50  $\mu$ m (**A,B**) and 10  $\mu$ m

7 (**A',B'**). 3v = 3<sup>rd</sup> ventricle.

8

9 Supplemental Figure 2. Leptin-stimulated pSTAT3 in DMH, LHA and NTS *Calcr*

10 neurons from *Calcr*<sup>eGFP-L10a</sup> and *LepRb*<sup>Calcr</sup>KO mice. Representative images showing

11 colocalization of pSTAT3-IR (purple) with GFP-IR (green) in the dorsomedial

12 hypothalamus (DMH), lateral hypothalamic area (LHA) and nucleus of the solitary tract

13 (NTS) of four-week-old *Calcr*<sup>eGFP-L10a</sup> (left panels) and *LepRb*<sup>Calcr</sup>KO (right panels) mice

14 treated with leptin (5mg/kg, i.p.) for 90 minutes. Arrowheads indicate colocalized

15 neurons.

16

17 Supplemental Figure 3. Leptin action via *LepRb*<sup>Calcr</sup> neurons controls energy balance.

18 Shown are body weight at ages 4-12 weeks (**A**), body composition at 14-15 weeks of

19 age (**B,C**), serum leptin concentrations at 10 weeks of age (**D**), body length from 5-11

20 weeks of age (**E**), and cumulative food intake from 5-12 weeks of age (**F**) for female

21 *Calcr*<sup>eGFP-L10a</sup> (Control) and *LepRb*<sup>Calcr</sup>KO mice. \*p<0.05; \*\*p<0.01; \*\*\*p<0.001;

22 \*\*\*\*p<0.0001 by ANOVA (A, F) or t-test (all other panels).

23

24 Supplemental Figure 4. Relatively preserved glycemic control in LepRb<sup>Calcr</sup>KO mice.  
25 Shown are blood glucose concentrations (mean +/-SEM) from 4-12 weeks of age (**A**),  
26 serum insulin concentrations at 10 weeks of age (**B**), glycemic excursions during GTT  
27 (2g/kg glucose; i.p.) at 12 weeks of age (**C**) and ITT (1 U/kg insulin; i.p.) and area under  
28 the curve for ITT (**D, E**) at 13 weeks of age for female Calcr<sup>eGFP-L10a</sup> (Control) and  
29 LepRb<sup>Calcr</sup>KO mice. Mean +/- SEM is shown for B-D. All panels: \*p<0.05; \*\*p<0.01; by  
30 t-test.

31  
32 Supplemental Figure 5. Colocalization of ARC Calcr neurons with NPY but not POMC  
33 neurons. (**A**) Shown are representative tdTomato (red, left panel, Calcr), GFP (green,  
34 middle, NPY), and merged (right panel) images from the ARC of Calcr<sup>tdTomato</sup>NPY<sup>GFP</sup>  
35 mice. (**B**) Shown are representative GFP (green, left panel, Calcr), dsRed (red, middle,  
36 POMC), and merged (right panel) images from the ARC of Calcr<sup>GFP</sup>POMC<sup>dsRed</sup> mice.

37  
38 Supplemental Figure 6. Medial basal ARC cFos in leptin-deficient and LepRb<sup>Calcr</sup>KO  
39 mice. Shown are representative images of cFos-IR (black) in the ARC of control (left),  
40 LepRb<sup>Calcr</sup>KO (middle) and Lep<sup>ob/ob</sup> (*ob/ob*, right) mice. Scale bar=200  $\mu$ m.

41

42

43 Supplemental Figure 1.

44

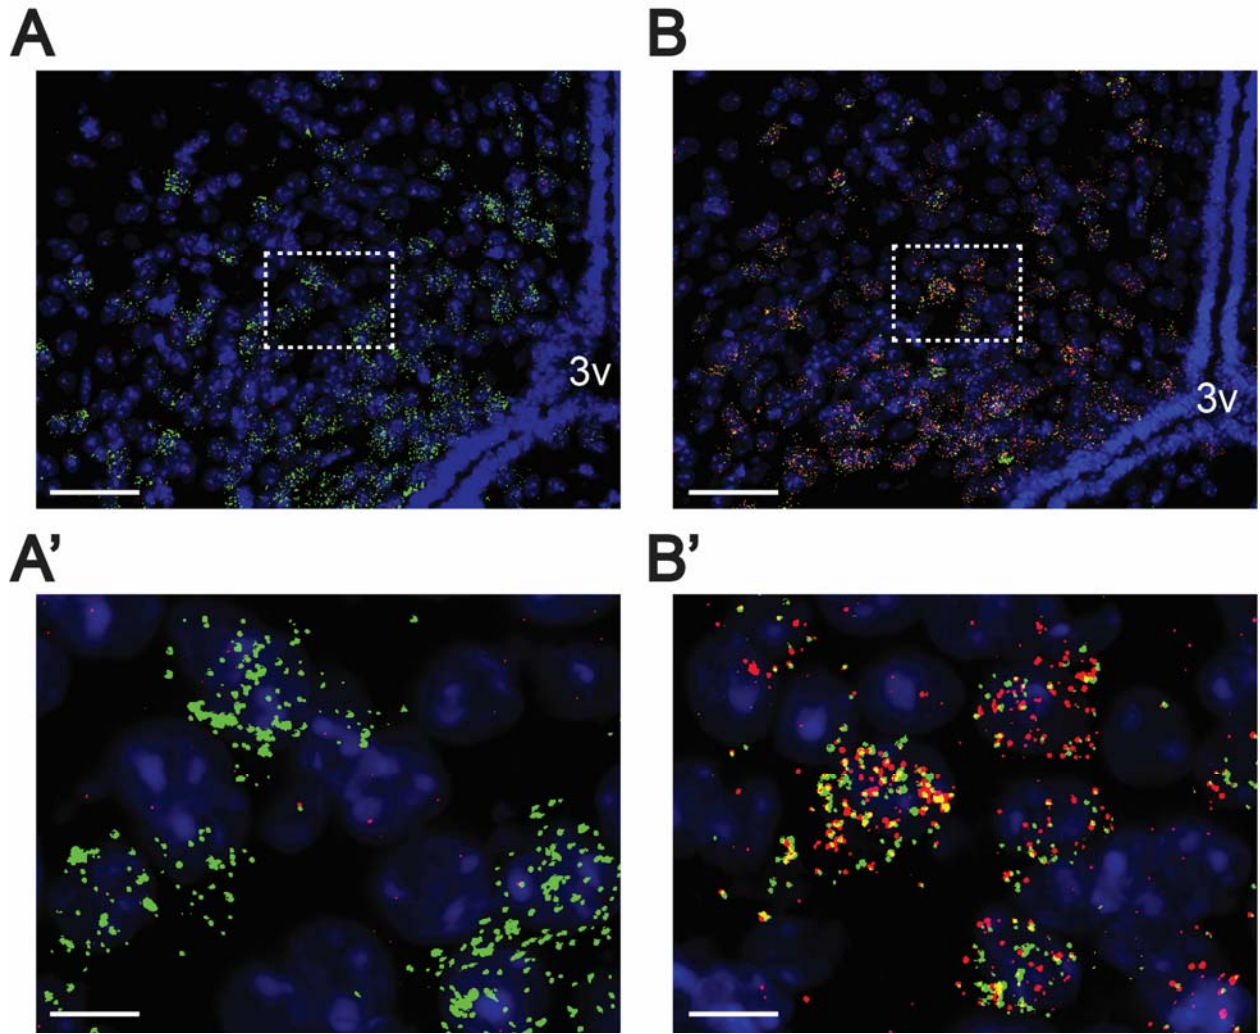

45

46

47

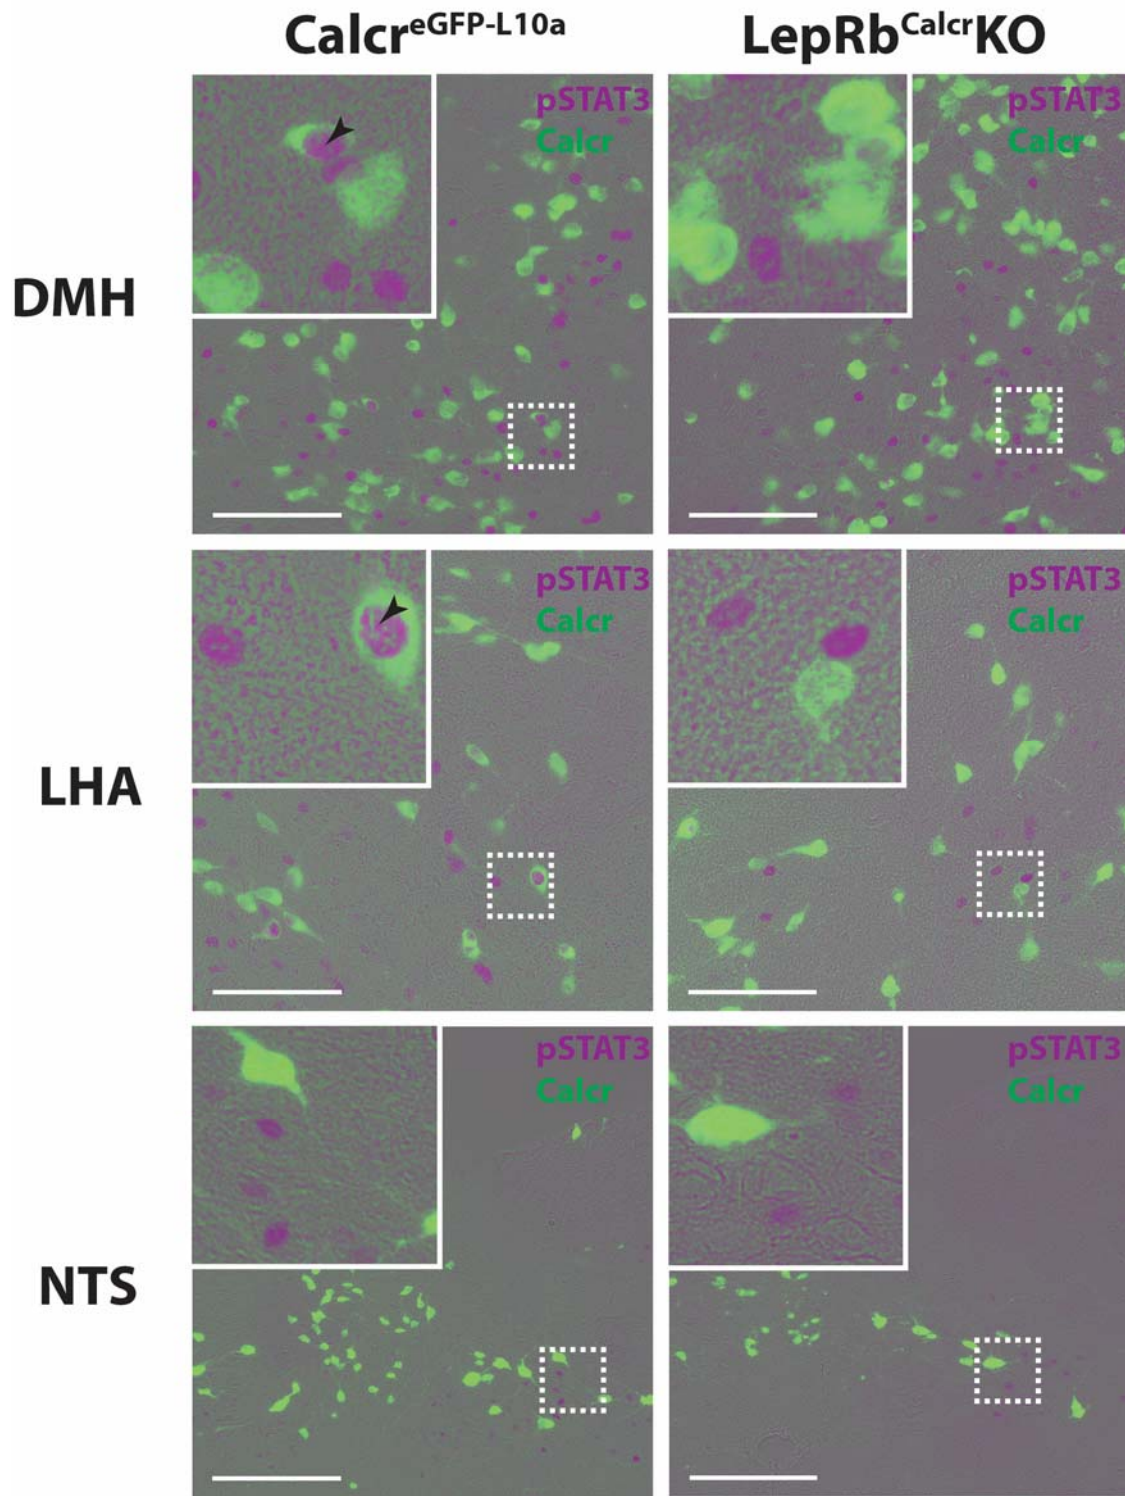

49

50

51

52 Supplemental Figure 3.

53

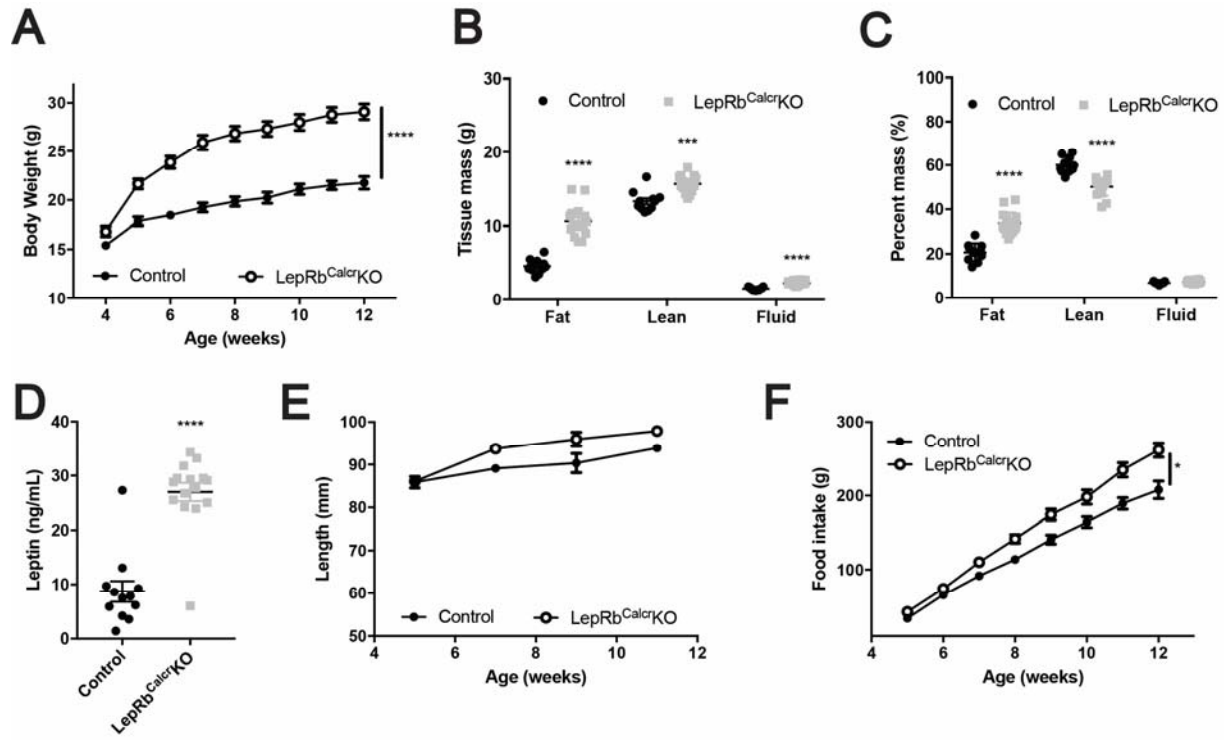

54

55

56

57

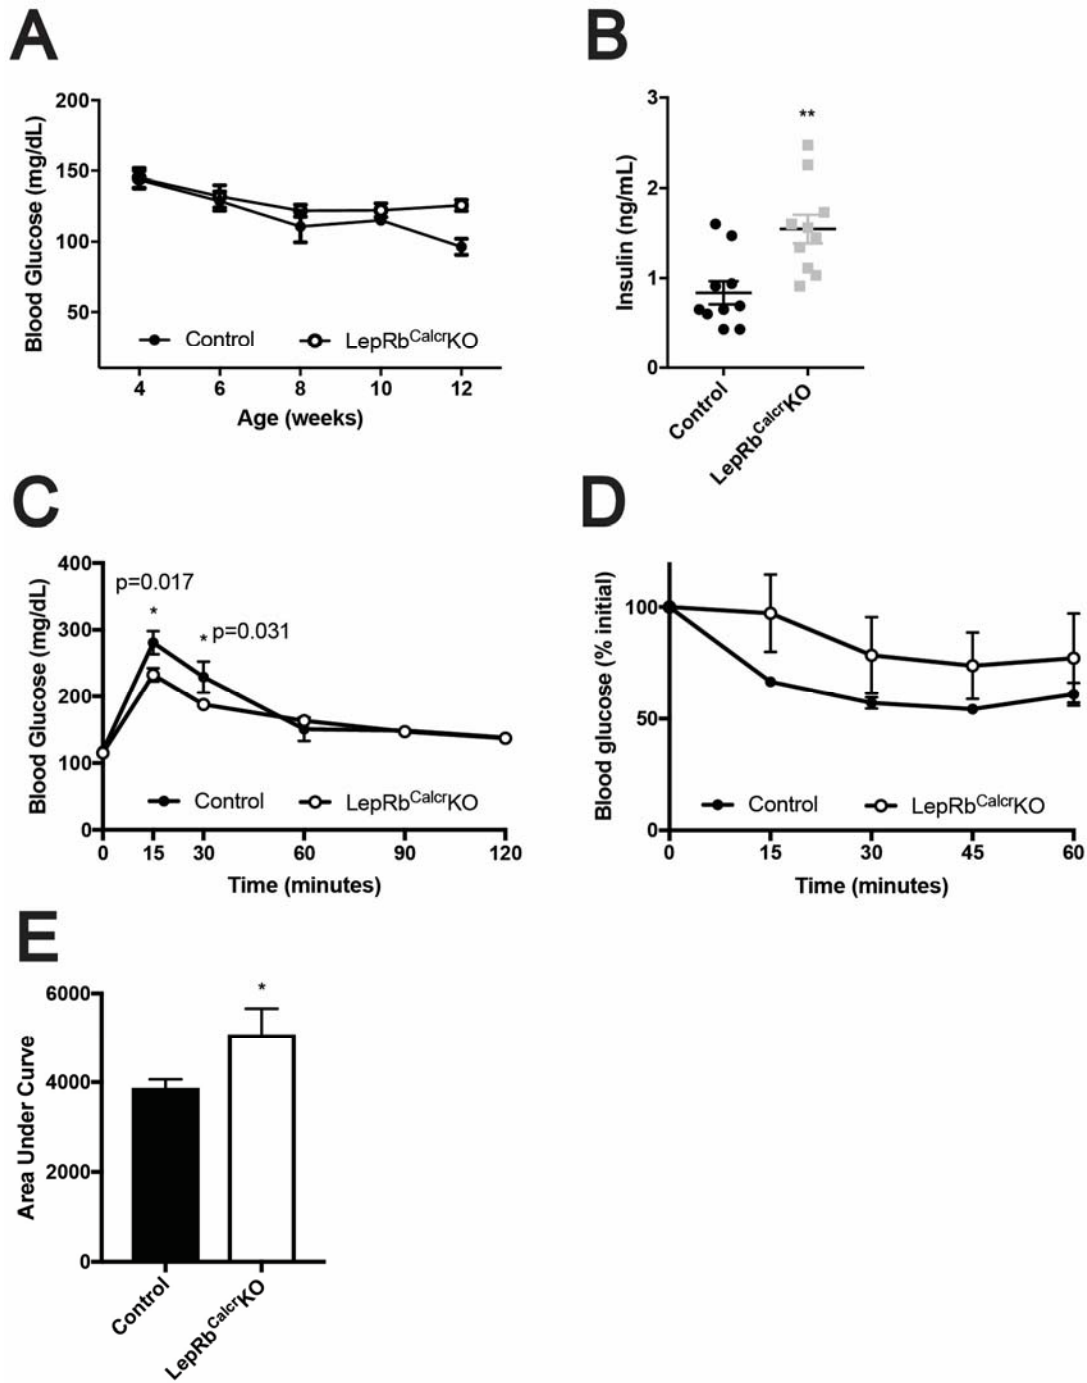

63 Supplemental Figure 5.

64

**A**

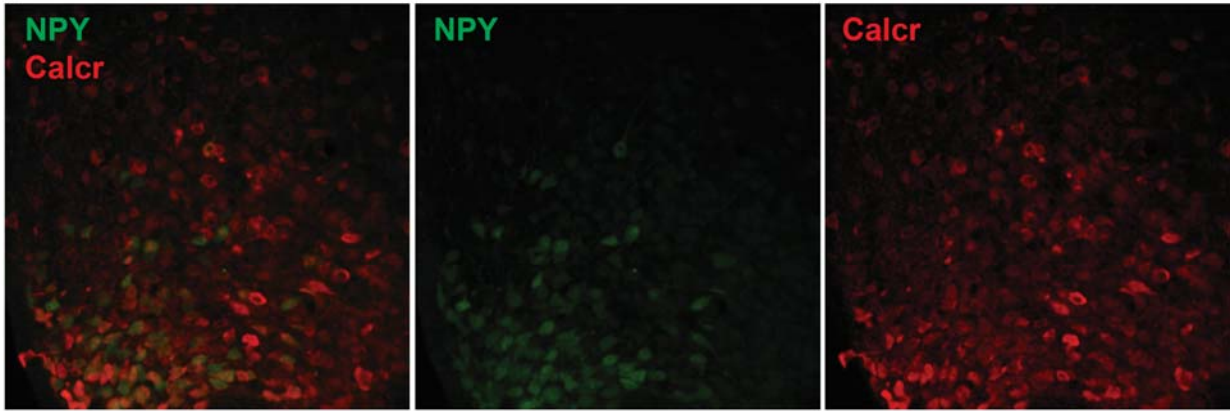

**B**

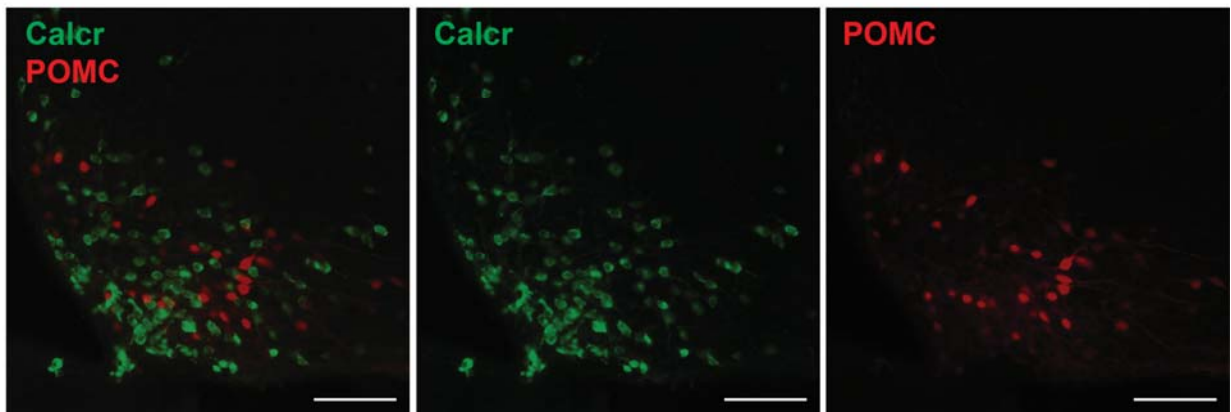

65

66

67 Supplemental Figure 6.

68

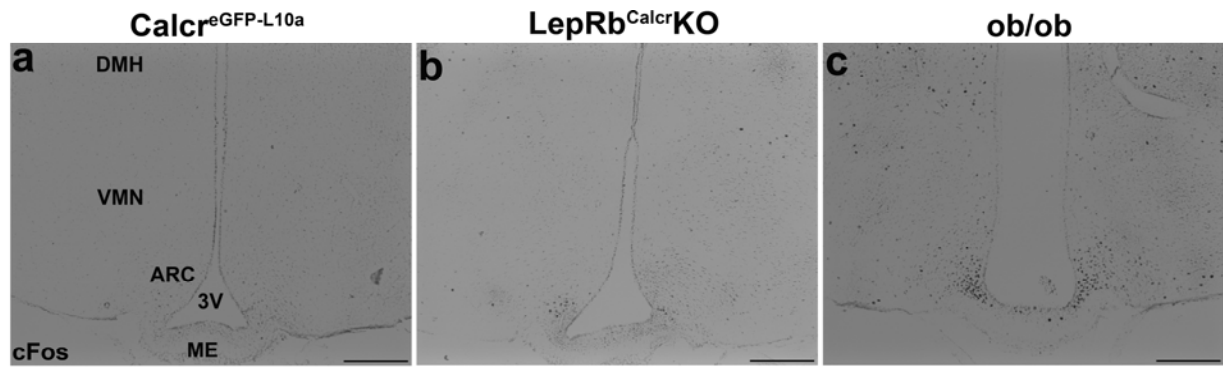

69

70
