# Supplementary material
Source: PubMed Central journal article supplement (PMC5888224)
Supplement: en.2017-03259.st1.pdf [file en.2017-03259.st1.pdf]

Supplemental Table 1. Expression and Fold enrichment of genes significantly enriched (blue) or under-represented (red) in hypothalamic Calcr neurons:

| Gene        | Calcr <sup>eGFP-L10a</sup> Expression (FPKM) | LepRb <sup>Calcr</sup> KO Expression (FPKM) | Calcr <sup>eGFP-L10a</sup> Enrichment (Fold) | LepRb <sup>Calcr</sup> KO Enrichment (Fold) |
|-------------|----------------------------------------------|---------------------------------------------|----------------------------------------------|---------------------------------------------|
| Agrp        | 62.94                                        | 62.08                                       | 11.59                                        | 21.19                                       |
| Npy         | 478.20                                       | 690.71                                      | 10.62                                        | 16.62                                       |
| Skor2       | 0.59                                         | 0.35                                        | 8.86                                         | 4.14                                        |
| Pax7        | 1.52                                         | 1.61                                        | 8.83                                         | 9.94                                        |
| Calcr       | 23.07                                        | 25.92                                       | 8.62                                         | 10.75                                       |
| Pck1        | 0.25                                         | 0.27                                        | 7.78                                         | 14.05                                       |
| Gpr50       | 13.77                                        | 13.85                                       | 7.12                                         | 7.95                                        |
| Omp         | 8.65                                         | 6.52                                        | 6.30                                         | 7.39                                        |
| Sst         | 1467.64                                      | 1426.65                                     | 5.49                                         | 5.52                                        |
| Asb4        | 100.34                                       | 91.89                                       | 4.85                                         | 4.63                                        |
| Tstd1       | 4.04                                         | 4.21                                        | 4.60                                         | 4.77                                        |
| Otp         | 115.36                                       | 98.68                                       | 4.24                                         | 3.94                                        |
| Serpina3i   | 0.21                                         | 0.09                                        | 4.13                                         | 1.03                                        |
| Bpifb3      | 0.16                                         | 0.15                                        | 4.10                                         | 4.12                                        |
| 4732456N10R | 7.22                                         | 7.20                                        | 4.09                                         | 4.25                                        |
| Gsc         | 6.48                                         | 5.44                                        | 4.02                                         | 3.91                                        |
| Tm4sf4      | 0.50                                         | 0.57                                        | 3.92                                         | 3.50                                        |
| Bsx         | 23.84                                        | 23.31                                       | 3.91                                         | 3.83                                        |
| Cited1      | 111.13                                       | 95.66                                       | 3.88                                         | 3.49                                        |
| 5830473C10R | 0.23                                         | 0.22                                        | 3.88                                         | 3.89                                        |
| Gstm3       | 0.30                                         | 0.17                                        | 3.85                                         | 5.96                                        |
| Corin       | 0.91                                         | 0.79                                        | 3.73                                         | 4.11                                        |
| Ghrh        | 47.79                                        | 51.75                                       | 3.73                                         | 4.97                                        |
| Brs3        | 6.72                                         | 6.56                                        | 3.66                                         | 3.53                                        |
| Rtp2        | 1.40                                         | 1.14                                        | 3.65                                         | 3.08                                        |
| Crh         | 16.28                                        | 11.90                                       | 3.54                                         | 2.66                                        |
| Rnaset2b    | 0.46                                         | 0.39                                        | 3.46                                         | 1.24                                        |
| Nts         | 89.01                                        | 66.56                                       | 3.43                                         | 3.07                                        |
| Peg10       | 326.05                                       | 278.04                                      | 3.29                                         | 3.19                                        |
| Nr5a2       | 2.03                                         | 2.28                                        | 3.25                                         | 4.53                                        |
| Irs4        | 78.95                                        | 64.73                                       | 3.25                                         | 2.75                                        |
| Vwa2        | 0.19                                         | 0.22                                        | 3.24                                         | 3.03                                        |
| Gal         | 164.46                                       | 149.86                                      | 3.24                                         | 2.98                                        |
| Krt26       | 0.46                                         | 0.49                                        | 3.23                                         | 2.62                                        |
| Procr       | 0.89                                         | 0.46                                        | 3.21                                         | 1.51                                        |
| Klf14       | 0.57                                         | 0.38                                        | 3.13                                         | 2.14                                        |
| Hmx2        | 7.23                                         | 6.21                                        | 3.11                                         | 2.67                                        |
| Nup62cl     | 3.61                                         | 4.90                                        | 3.02                                         | 4.45                                        |
| Mbnl3       | 1.07                                         | 1.14                                        | 2.99                                         | 2.94                                        |
| Gnb3        | 0.88                                         | 0.61                                        | 2.97                                         | 1.86                                        |
| Gsx1        | 6.93                                         | 5.96                                        | 2.91                                         | 2.70                                        |
| Arhgap36    | 105.57                                       | 105.13                                      | 2.89                                         | 3.06                                        |
| 3930402G23R | 0.46                                         | 0.38                                        | 2.81                                         | 2.15                                        |
| Trh         | 131.29                                       | 125.53                                      | 2.80                                         | 2.64                                        |
| Chrb4       | 0.42                                         | 0.50                                        | 2.77                                         | 2.98                                        |
| Il2rg       | 0.23                                         | 0.23                                        | 2.71                                         | 7.94                                        |
| Vmn2r1      | 0.34                                         | 0.33                                        | 2.70                                         | 1.45                                        |
| Dgkk        | 43.64                                        | 43.04                                       | 2.68                                         | 3.02                                        |
| Trpc6       | 1.48                                         | 1.76                                        | 2.68                                         | 2.78                                        |
| Mir9-2      | 29.66                                        | 0.00                                        | 2.64                                         | 0.00                                        |
| Gabre       | 5.73                                         | 6.54                                        | 2.62                                         | 2.86                                        |
| Prr19       | 2.84                                         | 2.40                                        | 2.61                                         | 2.07                                        |
| Gpc4        | 5.66                                         | 5.84                                        | 2.60                                         | 2.81                                        |
| Hmx3        | 11.18                                        | 9.15                                        | 2.59                                         | 2.36                                        |
| Nms         | 3.38                                         | 3.41                                        | 2.54                                         | 2.26                                        |
| Ebf3        | 18.79                                        | 19.64                                       | 2.48                                         | 2.28                                        |
| Nxph4       | 24.69                                        | 24.74                                       | 2.46                                         | 2.25                                        |
| 4933403O08R | 3.13                                         | 3.37                                        | 2.45                                         | 3.02                                        |
| Prlhr       | 1.42                                         | 1.62                                        | 2.45                                         | 2.91                                        |
| Yeats2      | 16.16                                        | 16.71                                       | 2.44                                         | 2.51                                        |
| Prr12       | 24.62                                        | 21.38                                       | 2.44                                         | 2.03                                        |
| Gch1        | 7.42                                         | 5.93                                        | 2.42                                         | 2.26                                        |
| Npy2r       | 15.39                                        | 16.76                                       | 2.42                                         | 2.77                                        |

|             |        |        |      |      |
|-------------|--------|--------|------|------|
| Gm10664     | 0.44   | 0.60   | 2.38 | 4.24 |
| Nhlh2       | 14.96  | 14.86  | 2.37 | 2.36 |
| Mc3r        | 3.97   | 3.70   | 2.37 | 1.99 |
| Npbwr1      | 2.33   | 2.52   | 2.36 | 2.52 |
| Zar1        | 5.15   | 4.90   | 2.36 | 2.46 |
| Gm5868      | 0.96   | 0.67   | 2.36 | 1.70 |
| Avpr1a      | 4.00   | 4.65   | 2.36 | 2.95 |
| Pgr15l      | 5.25   | 6.40   | 2.33 | 2.43 |
| Usp51       | 6.78   | 7.19   | 2.32 | 2.92 |
| Dlk1        | 94.98  | 96.02  | 2.32 | 2.44 |
| Fgf15       | 0.67   | 0.79   | 2.32 | 2.10 |
| Krt27       | 0.21   | 0.33   | 2.32 | 3.63 |
| Bmp3        | 0.78   | 0.86   | 2.31 | 2.28 |
| 2210404O07R | 3.15   | 2.47   | 2.31 | 1.48 |
| Adamts2     | 3.69   | 3.92   | 2.30 | 1.93 |
| BC055111    | 0.34   | 0.28   | 2.29 | 1.66 |
| Tac2        | 116.64 | 106.45 | 2.29 | 2.11 |
| 2010204K13R | 386.97 | 349.46 | 2.28 | 2.14 |
| Ecel1       | 63.51  | 66.51  | 2.28 | 2.50 |
| Rrad        | 18.23  | 18.73  | 2.27 | 2.30 |
| Ano7        | 1.08   | 1.39   | 2.26 | 2.14 |
| 2610018G03R | 10.33  | 10.37  | 2.24 | 2.55 |
| Piwil1      | 0.14   | 0.16   | 2.24 | 1.90 |
| Gpr101      | 21.03  | 25.06  | 2.23 | 2.57 |
| Ebf1        | 3.22   | 2.53   | 2.23 | 1.78 |
| Gchfr       | 5.18   | 4.30   | 2.23 | 2.22 |
| Fam159b     | 4.65   | 4.73   | 2.21 | 2.54 |
| Plagl1      | 42.96  | 39.35  | 2.19 | 2.07 |
| Six6        | 9.76   | 9.57   | 2.18 | 2.40 |
| Agtr1a      | 1.05   | 1.29   | 2.17 | 2.22 |
| Rufy4       | 0.90   | 0.89   | 2.15 | 2.42 |
| Neurod2     | 1.58   | 1.76   | 2.13 | 0.97 |
| Sim2        | 1.58   | 1.12   | 2.09 | 1.84 |
| Esr1        | 7.08   | 6.21   | 2.08 | 2.02 |
| Zcchc12     | 674.91 | 631.67 | 2.08 | 2.06 |
| Gabrq       | 12.69  | 13.64  | 2.07 | 2.56 |
| Vgf         | 115.36 | 106.70 | 2.06 | 1.93 |
| Tbx21       | 0.31   | 0.22   | 2.06 | 1.33 |
| Rps6ka6     | 19.56  | 20.55  | 2.06 | 2.33 |
| Chrna3      | 0.77   | 0.81   | 2.06 | 2.17 |
| Nppa        | 2.19   | 2.11   | 2.06 | 2.74 |
| C1ql4       | 2.66   | 2.49   | 2.06 | 2.38 |
| Gpr165      | 25.07  | 27.52  | 2.05 | 2.09 |
| Mab21l2     | 4.13   | 3.30   | 2.05 | 1.82 |
| Rab3b       | 71.01  | 46.91  | 2.04 | 2.22 |
| Nrn1l       | 5.46   | 4.73   | 2.04 | 1.71 |
| Zfp92       | 14.63  | 13.75  | 2.03 | 1.98 |
| Spint2      | 76.83  | 81.03  | 2.03 | 2.06 |
| Th          | 75.33  | 63.03  | 2.03 | 1.87 |
| Ngb         | 188.40 | 186.01 | 2.02 | 1.98 |
| Pcdh11x     | 2.77   | 3.23   | 1.99 | 2.27 |
| Vat1        | 303.43 | 277.42 | 1.98 | 1.94 |
| Sim1        | 6.93   | 6.99   | 1.98 | 1.96 |
| Diap3       | 0.63   | 0.63   | 1.98 | 1.82 |
| Gse1        | 20.12  | 19.55  | 1.98 | 1.88 |
| AW551984    | 126.96 | 121.32 | 1.97 | 2.00 |
| Fam159a     | 6.34   | 6.84   | 1.95 | 2.30 |
| Acbd7       | 5.71   | 6.36   | 1.95 | 2.34 |
| Tnfrsf11b   | 0.79   | 0.81   | 1.95 | 2.20 |
| Dmrtd1a     | 25.35  | 26.91  | 1.94 | 1.96 |
| Gm14492     | 1.53   | 1.36   | 1.94 | 1.88 |
| Gm5177      | 0.84   | 0.54   | 1.94 | 0.90 |
| LOC433944   | 1.05   | 1.38   | 1.94 | 2.35 |
| C2cd4c      | 10.58  | 9.84   | 1.93 | 1.79 |
| Tbx3        | 4.44   | 5.06   | 1.93 | 2.56 |

|              |         |         |      |      |
|--------------|---------|---------|------|------|
| Cpa4         | 2.09    | 2.34    | 1.93 | 2.32 |
| Lhx5         | 12.45   | 11.30   | 1.92 | 1.87 |
| Cd36         | 1.24    | 1.49    | 1.91 | 1.94 |
| Pnp2         | 3.52    | 3.94    | 1.89 | 2.35 |
| Kcna5        | 8.78    | 9.57    | 1.89 | 2.20 |
| Zim3         | 36.08   | 33.24   | 1.89 | 1.88 |
| Gck          | 21.21   | 19.90   | 1.89 | 1.92 |
| Ii1rapl2     | 1.16    | 1.50    | 1.89 | 1.96 |
| Celf6        | 122.91  | 117.50  | 1.88 | 1.89 |
| Aox3         | 0.44    | 0.34    | 1.87 | 1.29 |
| Ube2t        | 2.33    | 2.12    | 1.87 | 1.69 |
| Fut4         | 1.55    | 1.46    | 1.87 | 1.73 |
| Cxxc1        | 28.89   | 25.33   | 1.87 | 1.67 |
| Tmem26       | 1.77    | 2.03    | 1.87 | 2.26 |
| Kcnk9        | 13.63   | 13.21   | 1.87 | 1.72 |
| Ccl17        | 5.90    | 5.95    | 1.87 | 1.37 |
| Hbq1a        | 3.10    | 2.90    | 1.86 | 1.24 |
| Marcks1      | 215.76  | 205.14  | 1.86 | 1.71 |
| Frm3pd3      | 1.75    | 1.89    | 1.86 | 2.30 |
| Scn11a       | 0.18    | 0.20    | 1.85 | 1.13 |
| Resp18       | 852.40  | 904.39  | 1.85 | 1.91 |
| Scarf2       | 3.32    | 3.05    | 1.85 | 1.82 |
| Arhgap6      | 27.31   | 26.60   | 1.85 | 1.87 |
| Baiap2l2     | 0.76    | 0.65    | 1.85 | 1.27 |
| Ly6h         | 466.20  | 445.36  | 1.84 | 1.77 |
| Calca        | 7.09    | 8.02    | 1.84 | 2.21 |
| Msln         | 1.34    | 1.56    | 1.84 | 1.74 |
| Insm2        | 1.89    | 1.66    | 1.83 | 1.37 |
| Grpr         | 0.62    | 0.71    | 1.83 | 3.08 |
| Hap1         | 728.39  | 672.44  | 1.83 | 1.76 |
| Cngb1        | 2.84    | 3.12    | 1.83 | 1.94 |
| Cbln2        | 32.89   | 33.08   | 1.83 | 1.80 |
| Gaa          | 222.02  | 239.35  | 1.82 | 1.79 |
| Aamp         | 237.99  | 220.55  | 1.82 | 1.76 |
| Pth2r        | 1.45    | 1.55    | 1.82 | 2.31 |
| Lhfp15       | 23.24   | 25.51   | 1.82 | 1.91 |
| Slc38a4      | 1.19    | 1.30    | 1.80 | 2.23 |
| Ghsr         | 1.39    | 1.95    | 1.80 | 2.52 |
| Ndn          | 1848.66 | 1623.31 | 1.80 | 1.69 |
| 1700086L19Ri | 44.74   | 45.32   | 1.80 | 1.85 |
| Nup98        | 7.34    | 6.70    | 1.80 | 1.75 |
| Nptxr        | 27.48   | 19.21   | 1.79 | 0.93 |
| Gipc2        | 3.04    | 2.74    | 1.79 | 1.74 |
| Baiap3       | 206.64  | 187.74  | 1.79 | 1.69 |
| Serpina3n    | 31.95   | 19.19   | 1.79 | 1.13 |
| Phf1         | 55.34   | 53.49   | 1.79 | 1.74 |
| Lonrf2       | 121.94  | 119.22  | 1.79 | 1.83 |
| Magel2       | 16.66   | 16.30   | 1.78 | 1.78 |
| Rbp4         | 7.98    | 8.93    | 1.78 | 1.73 |
| Gstm6        | 45.59   | 47.04   | 1.78 | 1.92 |
| Ido1         | 1.41    | 1.05    | 1.78 | 1.42 |
| Bid          | 22.07   | 22.02   | 1.78 | 1.64 |
| Stk32b       | 12.08   | 12.20   | 1.78 | 1.97 |
| Chodl        | 6.94    | 7.25    | 1.78 | 1.93 |
| Magee1       | 167.96  | 160.84  | 1.77 | 1.69 |
| BC029722     | 228.03  | 206.00  | 1.77 | 1.70 |
| Mfng         | 3.22    | 3.04    | 1.77 | 1.72 |
| Gm8773       | 0.94    | 1.30    | 1.77 | 2.26 |
| 5330411J11Ri | 1.40    | 1.32    | 1.77 | 1.61 |
| Scml4        | 6.89    | 6.90    | 1.77 | 1.65 |
| Vat1l        | 284.40  | 266.95  | 1.77 | 1.74 |
| Bcam         | 9.29    | 12.02   | 1.77 | 1.78 |
| A730017C2OR  | 421.15  | 401.95  | 1.76 | 1.85 |
| Slc16a8      | 1.90    | 1.55    | 1.76 | 1.71 |
| Nmur2        | 1.16    | 1.20    | 1.76 | 1.88 |

|               |         |         |      |      |
|---------------|---------|---------|------|------|
| Scgn          | 9.31    | 9.62    | 1.76 | 2.26 |
| Gpc3          | 9.21    | 10.24   | 1.76 | 1.77 |
| Coch          | 7.09    | 6.44    | 1.75 | 1.46 |
| Plxnc1        | 18.74   | 19.99   | 1.75 | 1.80 |
| Wdr6          | 343.13  | 321.53  | 1.75 | 1.62 |
| Sstr2         | 6.00    | 6.96    | 1.75 | 1.74 |
| AI467606      | 2.59    | 2.62    | 1.75 | 1.47 |
| Prmt2         | 257.59  | 235.06  | 1.75 | 1.67 |
| Nop16         | 37.99   | 36.43   | 1.75 | 1.61 |
| Eid2b         | 42.22   | 40.07   | 1.74 | 1.82 |
| Gpx3          | 272.17  | 292.03  | 1.74 | 1.91 |
| Ar            | 4.71    | 4.97    | 1.74 | 1.84 |
| Crem          | 16.15   | 14.30   | 1.74 | 1.57 |
| Il13ra1       | 5.00    | 5.65    | 1.73 | 1.80 |
| Lhfpl1        | 0.38    | 0.43    | 1.73 | 2.30 |
| Scg2          | 288.62  | 327.96  | 1.73 | 1.86 |
| Vdr           | 0.32    | 0.46    | 1.73 | 2.11 |
| Mc4r          | 2.32    | 2.51    | 1.72 | 2.00 |
| 4931429I11Ril | 1.73    | 1.69    | 1.72 | 1.54 |
| Tnnt2         | 11.27   | 9.62    | 1.71 | 1.57 |
| Dclk3         | 18.88   | 19.03   | 1.71 | 1.73 |
| Cd5           | 0.26    | 0.22    | 1.71 | 2.28 |
| BC002163      | 63.63   | 140.94  | 1.71 | 1.28 |
| Dlx2          | 14.73   | 12.23   | 1.71 | 1.59 |
| Sgsm1         | 86.47   | 77.53   | 1.71 | 1.66 |
| 5031410I06Ril | 0.66    | 0.74    | 1.70 | 1.62 |
| Psmc3         | 137.85  | 123.38  | 1.70 | 1.55 |
| Tmem130       | 279.99  | 298.33  | 1.70 | 1.76 |
| Stk32a        | 11.59   | 12.47   | 1.70 | 1.89 |
| Nap1l5        | 3132.40 | 2948.49 | 1.69 | 1.73 |
| Blcap         | 213.95  | 211.30  | 1.69 | 1.70 |
| Chrna5        | 0.17    | 0.22    | 1.69 | 2.24 |
| Armcx6        | 12.63   | 12.51   | 1.69 | 1.72 |
| Gprasp2       | 241.61  | 220.74  | 1.68 | 1.68 |
| Tmem59l       | 129.66  | 140.94  | 1.68 | 1.67 |
| Bex2          | 1226.85 | 1080.72 | 1.68 | 1.63 |
| Adra2a        | 9.70    | 10.10   | 1.68 | 1.56 |
| Bdnf          | 6.37    | 6.33    | 1.68 | 1.66 |
| Rxrg          | 29.13   | 26.29   | 1.68 | 1.59 |
| Tnfaip8l3     | 7.19    | 7.85    | 1.68 | 2.13 |
| Pgrmc1        | 466.90  | 497.99  | 1.67 | 1.78 |
| Elof1         | 111.82  | 105.24  | 1.67 | 1.57 |
| Snx2          | 102.58  | 101.57  | 1.67 | 1.76 |
| Fnta          | 124.53  | 118.96  | 1.67 | 1.62 |
| Phf13         | 15.59   | 14.61   | 1.67 | 1.60 |
| Ccr10         | 1.35    | 1.28    | 1.67 | 1.78 |
| Impact        | 706.07  | 693.50  | 1.67 | 1.81 |
| Gast          | 3.26    | 4.07    | 1.67 | 2.77 |
| Nop10         | 235.05  | 218.41  | 1.67 | 1.64 |
| Rsph9         | 31.31   | 37.31   | 1.67 | 1.72 |
| Pafah1b3      | 117.53  | 109.42  | 1.66 | 1.65 |
| Pnmal1        | 111.98  | 108.27  | 1.66 | 1.62 |
| Gm10069       | 4.05    | 3.73    | 1.66 | 1.65 |
| Nrsn2         | 398.08  | 403.85  | 1.66 | 1.70 |
| Plek2         | 1.24    | 0.94    | 1.66 | 1.30 |
| Dlx1          | 32.66   | 27.88   | 1.66 | 1.53 |
| Gm5424        | 123.71  | 112.27  | 1.66 | 1.58 |
| Hist1h4d      | 2.22    | 3.00    | 1.65 | 2.37 |
| Pgpep1l       | 2.42    | 2.63    | 1.65 | 1.55 |
| Prdm13        | 1.97    | 1.45    | 1.65 | 1.05 |
| 2310033P09Ril | 29.50   | 27.35   | 1.65 | 1.58 |
| Dctn1         | 183.33  | 167.80  | 1.65 | 1.59 |
| Mpo           | 0.32    | 0.34    | 1.65 | 1.88 |
| Prkar2a       | 49.70   | 48.92   | 1.65 | 1.63 |
| Hmgn5         | 17.82   | 16.41   | 1.65 | 1.81 |

|              |        |        |      |      |
|--------------|--------|--------|------|------|
| Irf2bp1      | 50.82  | 47.89  | 1.64 | 1.53 |
| 0610011F06Ri | 107.97 | 99.14  | 1.64 | 1.55 |
| Qpct         | 22.22  | 24.07  | 1.64 | 1.66 |
| Mrps34       | 139.70 | 121.39 | 1.64 | 1.46 |
| Rai2         | 15.23  | 14.90  | 1.64 | 1.71 |
| Meox1        | 1.13   | 1.11   | 1.64 | 1.85 |
| Mdga1        | 7.32   | 7.79   | 1.64 | 1.79 |
| Usp11        | 181.45 | 175.04 | 1.64 | 1.68 |
| Pak6         | 23.30  | 23.73  | 1.63 | 1.62 |
| Rprml        | 22.09  | 20.17  | 1.63 | 1.33 |
| Kif17        | 10.31  | 10.37  | 1.63 | 1.57 |
| Pnoc         | 16.45  | 16.27  | 1.63 | 1.73 |
| As3mt        | 42.18  | 40.84  | 1.63 | 1.70 |
| Rassf7       | 2.92   | 2.56   | 1.63 | 1.46 |
| Gpr173       | 5.33   | 5.31   | 1.63 | 1.63 |
| 4933412E12Ri | 3.21   | 3.07   | 1.63 | 1.63 |
| Mrgpre       | 8.25   | 8.41   | 1.63 | 1.50 |
| Dos          | 253.18 | 235.34 | 1.63 | 1.60 |
| Usp27x       | 22.52  | 21.90  | 1.62 | 1.67 |
| Nrl          | 2.74   | 2.29   | 1.62 | 1.59 |
| Ik           | 161.35 | 149.58 | 1.62 | 1.69 |
| Mrap2        | 31.51  | 32.29  | 1.62 | 1.57 |
| Nol8         | 9.54   | 8.69   | 1.62 | 1.64 |
| Bex1         | 344.06 | 293.37 | 1.62 | 1.58 |
| Ppp1r9a      | 41.01  | 40.92  | 1.62 | 1.66 |
| 2210016F16Ri | 18.45  | 17.27  | 1.62 | 1.51 |
| Tusc3        | 128.66 | 131.90 | 1.62 | 1.53 |
| Mesdc2       | 27.86  | 30.83  | 1.62 | 1.79 |
| Lancl3       | 8.25   | 7.51   | 1.62 | 1.71 |
| Izumo4       | 33.89  | 33.18  | 1.62 | 1.62 |
| 1700045I19Ri | 8.88   | 7.76   | 1.62 | 1.40 |
| Bcor         | 3.92   | 3.89   | 1.62 | 1.64 |
| Mcm6         | 6.01   | 6.19   | 1.61 | 1.70 |
| Neurod6      | 1.44   | 1.85   | 1.61 | 1.64 |
| Gm10094,Sap  | 238.49 | 222.30 | 1.61 | 1.57 |
| 6430527G18R  | 37.80  | 34.82  | 1.61 | 1.51 |
| Tesc         | 29.32  | 23.96  | 1.61 | 1.40 |
| Fosb         | 1.28   | 1.55   | 1.61 | 1.62 |
| Hspa1a       | 3.38   | 2.98   | 1.61 | 1.40 |
| Fam183b      | 72.94  | 68.24  | 1.61 | 1.64 |
| 4933433P14Ri | 45.58  | 42.22  | 1.61 | 1.59 |
| Ptprn        | 123.53 | 135.49 | 1.61 | 1.63 |
| Bahcc1       | 3.37   | 3.56   | 1.61 | 1.71 |
| Atic         | 38.69  | 38.58  | 1.61 | 1.67 |
| Rims3        | 107.16 | 100.72 | 1.61 | 1.57 |
| Slc39a6      | 18.79  | 20.68  | 1.61 | 1.71 |
| Tmem28       | 10.06  | 10.52  | 1.60 | 1.61 |
| Slc9a7       | 4.92   | 5.60   | 1.60 | 1.68 |
| March9       | 22.54  | 19.15  | 1.60 | 1.37 |
| Hspa1b       | 1.32   | 0.94   | 1.60 | 1.11 |
| Surf2        | 52.75  | 48.21  | 1.60 | 1.48 |
| Grcc10       | 622.31 | 558.35 | 1.60 | 1.45 |
| Zfp526       | 3.67   | 3.25   | 1.60 | 1.48 |
| Adcyap1      | 45.03  | 50.03  | 1.60 | 1.54 |
| Plcx3        | 12.25  | 11.51  | 1.60 | 1.68 |
| 2210013O21R  | 214.24 | 205.51 | 1.60 | 1.58 |
| Lmna         | 35.04  | 30.99  | 1.60 | 1.32 |
| Pcbd1        | 172.79 | 170.19 | 1.60 | 1.61 |
| Racgap1      | 12.03  | 11.19  | 1.60 | 1.55 |
| Peg3         | 130.35 | 119.85 | 1.60 | 1.60 |
| Apex2        | 4.70   | 4.72   | 1.60 | 1.58 |
| Fbxl21       | 11.25  | 10.43  | 1.60 | 1.57 |
| 2810004N23R  | 27.52  | 25.72  | 1.60 | 1.57 |
| Nol4         | 43.51  | 44.07  | 1.60 | 1.66 |
| Cdadac1      | 70.33  | 69.65  | 1.60 | 1.70 |

|             |        |        |      |      |
|-------------|--------|--------|------|------|
| Igfbpl1     | 0.60   | 0.63   | 1.60 | 1.93 |
| Rnf208      | 179.20 | 167.30 | 1.60 | 1.52 |
| Maged1      | 545.19 | 490.02 | 1.60 | 1.53 |
| Ndufs5      | 243.96 | 131.52 | 1.60 | 1.23 |
| Pnck        | 323.67 | 297.46 | 1.60 | 1.51 |
| Gprasp1     | 294.94 | 281.90 | 1.60 | 1.62 |
| Tm4sf5      | 5.40   | 4.77   | 1.60 | 1.42 |
| Hmga1       | 56.44  | 49.24  | 1.60 | 1.20 |
| 2700090O03R | 54.16  | 48.32  | 1.60 | 1.48 |
| Slc39a11    | 7.60   | 8.22   | 1.60 | 1.56 |
| Heatr8      | 4.67   | 11.32  | 1.59 | 1.41 |
| Arl10       | 43.65  | 44.86  | 1.59 | 1.64 |
| Obfc2a      | 9.81   | 10.45  | 1.59 | 1.71 |
| Tm2d3       | 61.43  | 62.43  | 1.59 | 1.58 |
| Arhgap24    | 20.28  | 19.84  | 1.59 | 1.57 |
| Caly        | 290.30 | 289.06 | 1.59 | 1.57 |
| Adh7        | 0.88   | 0.95   | 1.59 | 2.15 |
| Insm1       | 7.36   | 5.77   | 1.59 | 1.38 |
| Ppp1r17     | 24.39  | 24.16  | 1.59 | 1.64 |
| Zrsr1       | 60.04  | 61.93  | 1.59 | 1.69 |
| Klhdc8b     | 34.50  | 34.37  | 1.58 | 1.63 |
| Romo1       | 327.83 | 296.20 | 1.58 | 1.43 |
| Pld3        | 179.61 | 189.78 | 1.58 | 1.50 |
| Unc119      | 95.37  | 90.80  | 1.58 | 1.53 |
| Cntnap2     | 46.95  | 51.36  | 1.58 | 1.75 |
| Gm7334      | 39.60  | 43.51  | 1.58 | 1.84 |
| Snd1        | 39.62  | 38.23  | 1.58 | 1.54 |
| Hyi         | 51.64  | 55.93  | 1.58 | 1.49 |
| Rhov        | 29.00  | 27.51  | 1.58 | 1.51 |
| Ppp1r11     | 119.65 | 110.77 | 1.58 | 1.50 |
| Mrpl54      | 109.84 | 107.10 | 1.58 | 1.48 |
| Tekt1       | 9.82   | 8.47   | 1.58 | 1.49 |
| AF529169    | 2.99   | 2.89   | 1.58 | 1.71 |
| Zbtb12      | 10.37  | 10.02  | 1.58 | 1.52 |
| Htr1d       | 1.77   | 2.44   | 1.58 | 2.24 |
| Wbp11       | 74.12  | 65.50  | 1.58 | 1.48 |
| 5730403B10R | 193.28 | 190.78 | 1.57 | 1.63 |
| Rragb       | 183.65 | 177.79 | 1.57 | 1.64 |
| Sub1        | 211.25 | 222.77 | 1.57 | 1.77 |
| Zcchc18     | 437.76 | 412.89 | 1.57 | 1.59 |
| Mettl16     | 27.50  | 26.37  | 1.57 | 1.64 |
| Ftsj2       | 21.13  | 17.75  | 1.57 | 1.33 |
| Gm1673      | 220.69 | 189.83 | 1.57 | 1.41 |
| Plvap       | 38.01  | 35.84  | 1.57 | 1.59 |
| Adar        | 76.99  | 71.25  | 1.57 | 1.58 |
| Peg3as      | 347.33 | 358.02 | 1.57 | 1.71 |
| Tceal3      | 200.58 | 193.60 | 1.57 | 1.55 |
| Fbll1       | 107.80 | 93.72  | 1.57 | 1.47 |
| Rab27a      | 14.78  | 14.12  | 1.57 | 1.52 |
| Nudt11      | 87.65  | 85.71  | 1.57 | 1.58 |
| Kcnip1      | 86.04  | 83.71  | 1.56 | 1.62 |
| Nop58       | 34.88  | 34.70  | 1.56 | 1.70 |
| Slc25a39    | 147.30 | 137.77 | 1.56 | 1.51 |
| Cyb5rl      | 4.25   | 4.54   | 1.56 | 1.65 |
| Cyth2       | 35.97  | 33.20  | 1.56 | 1.50 |
| Grin3a      | 6.78   | 7.69   | 1.56 | 1.54 |
| Magee2      | 23.40  | 21.68  | 1.56 | 1.66 |
| Satb2       | 1.57   | 1.18   | 1.56 | 1.64 |
| Mtap9       | 44.06  | 42.50  | 1.56 | 1.63 |
| Rtp1        | 1.09   | 0.96   | 1.56 | 1.51 |
| Ccdc160     | 12.04  | 11.35  | 1.56 | 1.50 |
| Zfp575      | 7.40   | 6.46   | 1.56 | 1.30 |
| Rac3        | 108.44 | 96.90  | 1.56 | 1.41 |
| Camsap2     | 43.13  | 42.54  | 1.56 | 1.63 |
| Pkib        | 9.84   | 10.29  | 1.56 | 1.68 |

|              |         |         |      |      |
|--------------|---------|---------|------|------|
| Dcaf12l1     | 89.86   | 84.93   | 1.56 | 1.56 |
| Lrrc47       | 29.90   | 27.19   | 1.56 | 1.46 |
| Mettl1       | 22.45   | 22.17   | 1.56 | 1.56 |
| Cfdp1        | 217.56  | 215.04  | 1.56 | 1.61 |
| Mesdc1       | 19.47   | 17.72   | 1.56 | 1.47 |
| Ptov1        | 207.60  | 179.58  | 1.56 | 1.32 |
| Ahi1         | 650.26  | 612.46  | 1.56 | 1.58 |
| Gnaz         | 42.80   | 41.31   | 1.56 | 1.46 |
| B630019K06R  | 184.72  | 164.76  | 1.56 | 1.44 |
| Rbm15b       | 27.47   | 24.52   | 1.56 | 1.41 |
| Trp53i11     | 60.07   | 63.72   | 1.55 | 1.52 |
| Grb10        | 90.90   | 83.50   | 1.55 | 1.57 |
| Tspyl2       | 184.53  | 173.17  | 1.55 | 1.61 |
| Sesn3        | 32.28   | 30.37   | 1.55 | 1.53 |
| Pnmal2       | 479.35  | 432.63  | 1.55 | 1.49 |
| Rraga        | 268.62  | 235.93  | 1.55 | 1.53 |
| Ndst4        | 2.62    | 2.96    | 1.55 | 1.57 |
| Fam196b      | 9.00    | 8.52    | 1.55 | 1.49 |
| Eif2b5       | 43.36   | 41.25   | 1.55 | 1.52 |
| Apoc3        | 2.31    | 2.65    | 1.55 | 1.70 |
| Cry1         | 17.37   | 17.36   | 1.55 | 1.57 |
| Pcdh20       | 5.56    | 6.95    | 1.55 | 1.95 |
| Ooep         | 1.71    | 1.64    | 1.55 | 1.55 |
| Wdr83        | 49.69   | 46.66   | 1.55 | 1.50 |
| Gpr27        | 13.47   | 10.13   | 1.55 | 1.07 |
| Ap1s2        | 37.76   | 36.21   | 1.55 | 1.73 |
| Svop         | 50.73   | 53.25   | 1.55 | 1.52 |
| Aff4         | 62.77   | 61.24   | 1.55 | 1.59 |
| Hspa5        | 98.25   | 105.71  | 1.55 | 1.65 |
| 1810026J23Ri | 65.71   | 62.90   | 1.55 | 1.56 |
| Cdc45        | 1.66    | 1.69    | 1.55 | 1.57 |
| Ccdc137      | 21.82   | 21.17   | 1.55 | 1.53 |
| Spag4        | 3.08    | 3.09    | 1.54 | 1.43 |
| Maff         | 1.50    | 1.55    | 1.54 | 1.53 |
| Brd9         | 40.70   | 38.82   | 1.54 | 1.62 |
| Cebpb        | 7.92    | 5.49    | 1.54 | 0.99 |
| Polr3gl      | 32.96   | 31.76   | 1.54 | 1.62 |
| Ifttd1       | 1.97    | 1.27    | 1.54 | 1.00 |
| Zfp667       | 15.21   | 14.85   | 1.54 | 1.58 |
| Cnpy2        | 56.42   | 58.37   | 1.54 | 1.53 |
| Gng3         | 363.03  | 359.59  | 1.54 | 1.53 |
| Eif2c2       | 15.44   | 14.22   | 1.54 | 1.48 |
| Selm         | 259.88  | 233.02  | 1.54 | 1.39 |
| A730046J19Ri | 1.80    | 1.59    | 1.54 | 1.53 |
| Grid2        | 3.33    | 3.71    | 1.54 | 1.57 |
| Fkbp6        | 0.19    | 0.83    | 1.54 | 2.44 |
| Pnma2        | 50.44   | 50.05   | 1.54 | 1.58 |
| Isyna1       | 56.29   | 46.29   | 1.54 | 1.40 |
| Snap47       | 565.08  | 532.42  | 1.54 | 1.49 |
| Tub          | 88.07   | 86.32   | 1.54 | 1.54 |
| Iscu         | 398.81  | 366.86  | 1.54 | 1.44 |
| Gnas         | 3802.80 | 3290.57 | 1.54 | 1.43 |
| Tmem22       | 34.51   | 36.13   | 1.54 | 1.64 |
| Vamp4        | 115.69  | 120.24  | 1.54 | 1.69 |
| Lgals3bp     | 6.36    | 5.81    | 1.53 | 1.47 |
| G3bp2        | 238.81  | 218.05  | 1.53 | 1.58 |
| Apitd1       | 7.68    | 6.30    | 1.53 | 1.14 |
| Shisa2       | 2.84    | 2.74    | 1.53 | 1.37 |
| Alg2         | 88.98   | 97.26   | 1.53 | 1.64 |
| Rgmb         | 30.50   | 29.17   | 1.53 | 1.52 |
| Snurf        | 344.40  | 338.86  | 1.53 | 1.50 |
| Tuba8        | 8.99    | 8.49    | 1.53 | 1.67 |
| Rwdd2a       | 139.10  | 130.76  | 1.53 | 1.57 |
| Nme1         | 386.70  | 354.09  | 1.53 | 1.46 |
| Upk3a        | 0.66    | 0.78    | 1.53 | 1.79 |

|             |        |        |      |      |
|-------------|--------|--------|------|------|
| Gm6793      | 252.70 | 225.48 | 1.53 | 1.66 |
| Ogfod1      | 101.46 | 97.58  | 1.53 | 1.51 |
| Mtrr        | 7.14   | 6.84   | 1.53 | 1.45 |
| Ldha        | 293.66 | 265.22 | 1.53 | 1.38 |
| Ddost       | 40.07  | 41.56  | 1.53 | 1.50 |
| Pldn        | 29.09  | 29.57  | 1.53 | 1.60 |
| Polr2f      | 225.18 | 208.07 | 1.53 | 1.49 |
| Pygl        | 5.52   | 5.55   | 1.53 | 1.45 |
| Hes6        | 35.19  | 33.28  | 1.53 | 1.50 |
| Klhl7       | 72.51  | 72.87  | 1.53 | 1.65 |
| Tmem66      | 155.27 | 162.13 | 1.53 | 1.53 |
| Mrps31      | 31.74  | 27.93  | 1.53 | 1.37 |
| Spryd3      | 193.45 | 183.20 | 1.53 | 1.50 |
| Pnma3       | 32.83  | 33.32  | 1.52 | 1.56 |
| Vwa5a       | 6.77   | 5.84   | 1.52 | 1.24 |
| Scaper      | 16.61  | 15.96  | 1.52 | 1.56 |
| Fxyd6       | 232.64 | 237.74 | 1.52 | 1.52 |
| Tsply3      | 45.20  | 42.62  | 1.52 | 1.50 |
| Pi16        | 4.85   | 4.30   | 1.52 | 1.54 |
| 1700037H04R | 196.79 | 184.54 | 1.52 | 1.47 |
| Hn1         | 125.59 | 126.57 | 1.52 | 1.48 |
| Mtch1       | 660.03 | 603.92 | 1.52 | 1.40 |
| Tacr1       | 2.85   | 3.02   | 1.52 | 1.49 |
| Zkscan5     | 8.70   | 8.02   | 1.52 | 1.43 |
| Rngtt       | 18.99  | 18.24  | 1.52 | 1.64 |
| Pja1        | 313.49 | 274.67 | 1.52 | 1.46 |
| Pdyp        | 312.92 | 284.09 | 1.52 | 1.35 |
| Tmem176a    | 17.58  | 14.56  | 1.52 | 1.25 |
| Asb16       | 4.66   | 3.91   | 1.52 | 1.25 |
| Trim28      | 82.38  | 73.06  | 1.52 | 1.38 |
| Cartpt      | 159.21 | 102.42 | 1.52 | 1.02 |
| Gpr135      | 10.04  | 9.13   | 1.52 | 1.34 |
| Lig1        | 10.60  | 10.69  | 1.52 | 1.41 |
| Tbl1x       | 25.56  | 24.91  | 1.52 | 1.57 |
| Podxl2      | 130.41 | 140.64 | 1.52 | 1.48 |
| Irs2        | 12.23  | 11.44  | 1.52 | 1.46 |
| Cisd3       | 86.27  | 78.07  | 1.51 | 1.35 |
| Rgag4       | 40.75  | 38.06  | 1.51 | 1.50 |
| Nhlrc1      | 26.35  | 25.09  | 1.51 | 1.44 |
| Mrpl34      | 86.78  | 81.61  | 1.51 | 1.46 |
| Ssu72       | 119.62 | 108.26 | 1.51 | 1.40 |
| Gltpd1      | 21.10  | 21.39  | 1.51 | 1.51 |
| Gm16039     | 84.52  | 80.99  | 1.51 | 1.54 |
| Zfp239      | 30.15  | 29.44  | 1.51 | 1.45 |
| Neurod1     | 2.32   | 2.03   | 1.51 | 1.05 |
| Rnase6      | 3.97   | 4.41   | 1.51 | 1.34 |
| Tmem8c      | 0.71   | 0.94   | 1.51 | 1.73 |
| Gira3       | 4.26   | 5.04   | 1.51 | 1.70 |
| Oaz1-ps     | 464.17 | 423.94 | 1.51 | 1.38 |
| Adcy3       | 8.43   | 9.10   | 1.51 | 1.51 |
| Ndufa7      | 398.87 | 374.21 | 1.51 | 1.38 |
| Rad21l      | 0.78   | 0.89   | 1.51 | 1.60 |
| 1500011H22R | 167.86 | 164.78 | 1.51 | 1.48 |
| Pou3f4      | 3.93   | 3.82   | 1.51 | 1.59 |
| Smarca5     | 39.36  | 40.60  | 1.51 | 1.68 |
| Ampd2       | 52.24  | 44.91  | 1.51 | 1.42 |
| Pam16       | 181.92 | 162.70 | 1.51 | 1.36 |
| Cyb5r1      | 15.40  | 16.57  | 1.51 | 1.50 |
| Slc35f4     | 9.79   | 9.05   | 1.51 | 1.47 |
| Med30       | 63.88  | 61.23  | 1.51 | 1.44 |
| Nol12       | 17.82  | 16.84  | 1.50 | 1.39 |
| Ctxn1       | 324.37 | 294.00 | 1.50 | 1.36 |
| Uck1        | 52.54  | 49.86  | 1.50 | 1.35 |
| Ngfrap1     | 815.58 | 767.17 | 1.50 | 1.47 |
| Kcnf1       | 8.49   | 9.32   | 1.50 | 1.44 |



|               |        |        |      |      |
|---------------|--------|--------|------|------|
| Angpt1        | 3.78   | 3.86   | 1.50 | 1.52 |
| N4bp2l1       | 62.13  | 66.41  | 1.50 | 1.59 |
| Trim45        | 9.29   | 8.75   | 1.50 | 1.50 |
| Gtpbp4        | 41.22  | 40.57  | 1.50 | 1.68 |
| Fxr2          | 92.21  | 83.63  | 1.50 | 1.39 |
| Gmip          | 5.17   | 4.54   | 1.50 | 1.32 |
| Kif3c         | 49.98  | 48.33  | 1.50 | 1.48 |
| Trpc5         | 3.26   | 3.42   | 1.50 | 1.55 |
| Hn1l          | 14.91  | 15.09  | 1.50 | 1.51 |
| Prok2         | 2.00   | 2.03   | 1.50 | 2.17 |
| Araf          | 414.37 | 413.79 | 1.50 | 1.58 |
| 5730403107Ril | 0.63   | 0.58   | 1.50 | 1.67 |
| Cetn2         | 101.58 | 94.97  | 1.50 | 1.60 |
| Gspt2         | 37.91  | 36.64  | 1.50 | 1.52 |
| Ppme1         | 142.89 | 136.68 | 1.50 | 1.53 |
| Sumo3         | 147.07 | 148.34 | 1.50 | 1.56 |
| Syt5          | 86.97  | 94.87  | 1.49 | 1.54 |
| Utp18         | 18.35  | 18.17  | 1.49 | 1.59 |
| Foxr2         | 3.34   | 3.45   | 1.49 | 1.58 |
| Isl1          | 29.02  | 28.73  | 1.49 | 1.69 |
| Smyd3         | 24.56  | 23.86  | 1.49 | 1.52 |
| Prpsap2       | 63.53  | 61.61  | 1.49 | 1.55 |
| Mcf2          | 65.52  | 68.48  | 1.49 | 1.58 |
| Exosc9        | 44.43  | 41.55  | 1.49 | 1.58 |
| Dnahc1        | 3.87   | 3.96   | 1.49 | 1.67 |
| Efna5         | 11.32  | 11.44  | 1.49 | 1.62 |
| Yip4          | 47.23  | 51.86  | 1.49 | 1.65 |
| Txnrd1        | 54.69  | 51.47  | 1.49 | 1.50 |
| Gnl3l         | 145.93 | 143.56 | 1.49 | 1.56 |
| Peg13         | 197.27 | 199.89 | 1.49 | 1.55 |
| Rfc3          | 15.91  | 16.22  | 1.49 | 1.50 |
| Fndc3a        | 42.01  | 41.80  | 1.49 | 1.63 |
| Rasd2         | 66.48  | 66.78  | 1.49 | 1.56 |
| Trpm4         | 2.34   | 2.49   | 1.48 | 1.51 |
| Vwc2l         | 8.85   | 9.41   | 1.48 | 1.71 |
| Zwint         | 651.66 | 629.18 | 1.48 | 1.55 |
| Kctd16        | 3.95   | 4.34   | 1.48 | 1.72 |
| Fbxo9         | 182.75 | 177.46 | 1.48 | 1.51 |
| Ddc           | 64.67  | 62.21  | 1.48 | 1.52 |
| Krt77         | 8.50   | 8.99   | 1.48 | 1.54 |
| Pdia6         | 39.99  | 41.69  | 1.48 | 1.50 |
| Rln1          | 1.82   | 2.17   | 1.48 | 2.31 |
| Styk1         | 0.40   | 0.50   | 1.48 | 1.90 |
| Gdi1          | 572.60 | 542.14 | 1.48 | 1.50 |
| Wdr54         | 21.06  | 21.18  | 1.48 | 1.52 |
| Ubl5          | 119.40 | 119.67 | 1.48 | 1.57 |
| Tro           | 51.23  | 50.65  | 1.48 | 1.58 |
| Mrps14        | 64.47  | 64.05  | 1.48 | 1.66 |
| Prepl         | 395.70 | 369.07 | 1.48 | 1.51 |
| Rsad2         | 0.45   | 0.44   | 1.48 | 1.65 |
| Tbca          | 490.49 | 500.50 | 1.48 | 1.53 |
| Glg1          | 16.33  | 17.56  | 1.48 | 1.58 |
| Grid1         | 14.23  | 15.15  | 1.47 | 1.52 |
| Dnajc12       | 58.92  | 60.83  | 1.47 | 1.54 |
| Fam70a        | 55.93  | 65.46  | 1.47 | 1.71 |
| Dsp           | 0.25   | 0.29   | 1.47 | 1.65 |
| Acta1         | 9.66   | 8.78   | 1.47 | 1.59 |
| Rsph3b        | 5.34   | 4.68   | 1.47 | 1.52 |
| Nkrf          | 35.81  | 34.96  | 1.47 | 1.57 |
| Tram1l1       | 29.09  | 32.40  | 1.47 | 1.71 |
| Morf4l2       | 459.68 | 430.96 | 1.47 | 1.51 |
| Slc30a9       | 126.11 | 130.17 | 1.47 | 1.54 |
| Nxn2          | 1.77   | 1.82   | 1.47 | 1.96 |
| Hnrnpk        | 417.35 | 385.21 | 1.46 | 1.52 |
| Gna14         | 0.55   | 0.66   | 1.46 | 1.86 |

|         |        |        |      |      |
|---------|--------|--------|------|------|
| Ostc    | 59.16  | 61.98  | 1.46 | 1.51 |
| Gng4    | 81.22  | 85.74  | 1.46 | 1.55 |
| Gem     | 3.58   | 3.03   | 1.46 | 1.75 |
| Prkar1a | 742.31 | 717.56 | 1.46 | 1.55 |
| F12     | 0.48   | 0.49   | 1.46 | 1.68 |
| Zfp334  | 14.22  | 13.76  | 1.46 | 1.52 |
| Gmps    | 21.53  | 21.28  | 1.46 | 1.51 |
| Mgat4c  | 4.98   | 5.65   | 1.46 | 1.80 |
| Gm5465  | 0.44   | 0.42   | 1.46 | 1.69 |
| Ate1    | 72.74  | 70.96  | 1.46 | 1.53 |
| Usp29   | 35.96  | 33.68  | 1.46 | 1.52 |
| Tmed4   | 51.07  | 53.55  | 1.46 | 1.50 |
| Xlr3a   | 2.38   | 2.96   | 1.46 | 1.74 |
| Bcas2   | 152.42 | 153.68 | 1.45 | 1.62 |
| Elac1   | 38.07  | 38.87  | 1.45 | 1.54 |
| Ddx3y   | 17.24  | 21.67  | 1.45 | 1.74 |
| Moap1   | 28.72  | 29.27  | 1.45 | 1.68 |
| Gm15612 | 20.74  | 23.25  | 1.45 | 1.53 |
| Polr2k  | 120.11 | 119.85 | 1.45 | 1.52 |
| Loxl1   | 1.00   | 0.98   | 1.45 | 1.59 |
| Ormdl3  | 34.39  | 36.35  | 1.45 | 1.50 |
| Silbp   | 63.51  | 62.91  | 1.45 | 1.58 |
| Gng2    | 256.90 | 261.30 | 1.45 | 1.53 |
| Bex4    | 131.93 | 127.08 | 1.45 | 1.53 |
| Sstr5   | 1.21   | 1.30   | 1.45 | 1.99 |
| Gimap6  | 1.21   | 1.15   | 1.45 | 1.60 |
| Syt6    | 18.77  | 18.55  | 1.45 | 1.57 |
| Cdh18   | 10.89  | 12.29  | 1.45 | 1.63 |
| Cacybp  | 177.89 | 172.78 | 1.44 | 1.57 |
| Cd274   | 2.17   | 2.80   | 1.44 | 1.59 |
| Hyou1   | 20.62  | 23.66  | 1.44 | 1.60 |
| Pdzd3   | 1.60   | 1.59   | 1.44 | 1.66 |
| Aff2    | 3.16   | 3.29   | 1.44 | 1.56 |
| Hprt    | 474.38 | 458.92 | 1.44 | 1.54 |
| C1qtnf7 | 0.19   | 0.07   | 1.44 | 0.31 |
| Chmp5   | 166.42 | 162.87 | 1.44 | 1.51 |
| Frmf7   | 1.76   | 1.84   | 1.44 | 1.77 |
| Zbtb11  | 28.05  | 29.59  | 1.43 | 1.58 |
| Cd200   | 84.38  | 95.35  | 1.43 | 1.58 |
| Pdia3   | 63.34  | 71.07  | 1.43 | 1.54 |
| Snrpd1  | 171.36 | 157.70 | 1.43 | 1.52 |
| Fam136a | 52.33  | 52.45  | 1.43 | 1.57 |
| Lrfr5   | 15.46  | 15.61  | 1.43 | 1.53 |
| Cbln4   | 22.39  | 24.33  | 1.43 | 1.54 |
| Stac    | 4.36   | 4.15   | 1.43 | 1.64 |
| Pcdh7   | 11.19  | 12.45  | 1.43 | 1.58 |
| Hmgn1   | 153.94 | 148.24 | 1.43 | 1.50 |
| Alkbh8  | 10.28  | 10.33  | 1.43 | 1.65 |
| Iqcf5   | 0.77   | 0.87   | 1.43 | 3.25 |
| Clca1   | 0.85   | 0.73   | 1.42 | 1.55 |
| Cdc25a  | 7.03   | 7.37   | 1.42 | 1.52 |
| Rheb    | 227.75 | 229.50 | 1.42 | 1.53 |
| Ssb     | 150.07 | 141.18 | 1.42 | 1.52 |
| Zrsr2   | 31.42  | 31.93  | 1.42 | 1.52 |
| Fgf14   | 28.66  | 28.71  | 1.42 | 1.56 |
| Vcpip1  | 20.32  | 21.00  | 1.42 | 1.56 |
| Lrpap1  | 54.43  | 61.91  | 1.42 | 1.51 |
| Nanos1  | 28.36  | 28.44  | 1.42 | 1.53 |
| Zfp275  | 22.41  | 23.05  | 1.42 | 1.55 |
| Nr0b1   | 2.12   | 2.38   | 1.41 | 1.87 |
| E2f6    | 43.64  | 43.34  | 1.41 | 1.51 |
| Fip111  | 30.64  | 31.55  | 1.41 | 1.54 |
| Rbbp7   | 121.26 | 116.68 | 1.41 | 1.51 |
| Pam     | 57.89  | 69.46  | 1.41 | 1.54 |
| Jph2    | 3.29   | 3.66   | 1.41 | 1.65 |

|              |        |        |      |      |
|--------------|--------|--------|------|------|
| 2310057M21F  | 21.86  | 21.38  | 1.41 | 1.58 |
| Ctsl         | 37.49  | 42.60  | 1.41 | 1.57 |
| Srsf5        | 216.19 | 184.44 | 1.40 | 1.53 |
| Cct8         | 225.87 | 218.99 | 1.40 | 1.50 |
| Clvs1        | 10.26  | 10.50  | 1.40 | 1.57 |
| Srp54c       | 10.11  | 10.32  | 1.40 | 1.52 |
| Arl6         | 64.22  | 64.77  | 1.40 | 1.57 |
| Arf4         | 165.93 | 159.20 | 1.40 | 1.52 |
| 1810048J11Ri | 11.76  | 13.06  | 1.39 | 1.52 |
| Ube3a        | 23.03  | 23.94  | 1.39 | 1.61 |
| Klhl9        | 58.64  | 58.28  | 1.39 | 1.50 |
| Tm9sf2       | 38.59  | 42.02  | 1.38 | 1.51 |
| Clvs2        | 30.98  | 31.68  | 1.38 | 1.54 |
| Kcna4        | 5.03   | 5.04   | 1.38 | 1.51 |
| Lrrtm3       | 11.08  | 11.81  | 1.38 | 1.53 |
| C1galt1c1    | 12.84  | 13.12  | 1.38 | 1.52 |
| Txn1         | 130.35 | 132.08 | 1.38 | 1.52 |
| Ass1         | 40.93  | 43.77  | 1.38 | 1.55 |
| Slc7a1       | 6.45   | 7.25   | 1.38 | 1.51 |
| Ccdc147      | 0.56   | 0.59   | 1.38 | 1.55 |
| Ppef1        | 0.55   | 0.61   | 1.37 | 1.70 |
| Rxfp3        | 3.20   | 3.44   | 1.37 | 1.60 |
| Tceal1       | 167.08 | 164.50 | 1.37 | 1.52 |
| Efcab10      | 16.75  | 17.55  | 1.37 | 1.61 |
| Esyt3        | 4.64   | 5.25   | 1.37 | 1.62 |
| Pcsk1        | 10.52  | 12.93  | 1.37 | 1.63 |
| Sdc2         | 33.13  | 37.83  | 1.37 | 1.55 |
| Penk         | 74.70  | 85.14  | 1.37 | 1.63 |
| Pla2g2c      | 0.55   | 0.72   | 1.37 | 1.79 |
| Fytd1        | 71.11  | 70.42  | 1.36 | 1.54 |
| Apoa1        | 1.28   | 1.42   | 1.36 | 1.61 |
| Tmx4         | 99.91  | 114.65 | 1.36 | 1.53 |
| Cd1d1        | 1.09   | 1.45   | 1.36 | 1.58 |
| Nags         | 0.38   | 0.57   | 1.36 | 2.92 |
| Trim23       | 25.96  | 27.26  | 1.36 | 1.53 |
| Gm16894      | 1.79   | 1.99   | 1.35 | 1.77 |
| Zfp37        | 15.19  | 15.54  | 1.34 | 1.51 |
| Nodal        | 0.34   | 0.40   | 1.34 | 1.95 |
| Aloxe3       | 5.10   | 5.16   | 1.34 | 1.53 |
| Ptprk        | 6.20   | 7.05   | 1.34 | 1.51 |
| Fgf17        | 0.62   | 0.77   | 1.34 | 1.55 |
| Fuca1        | 12.59  | 14.64  | 1.33 | 1.51 |
| Rgag1        | 2.33   | 2.36   | 1.33 | 1.51 |
| Serpini1     | 44.04  | 52.98  | 1.33 | 1.50 |
| Glp1r        | 1.25   | 1.36   | 1.32 | 1.68 |
| Syt10        | 2.76   | 3.36   | 1.32 | 1.62 |
| Ankrd2       | 2.22   | 2.87   | 1.32 | 1.86 |
| Slc12a7      | 0.86   | 0.94   | 1.32 | 1.58 |
| Ormdl1       | 10.16  | 11.74  | 1.32 | 1.54 |
| C530044C16R  | 1.12   | 1.29   | 1.32 | 1.64 |
| D330045A20R  | 1.11   | 1.29   | 1.32 | 1.56 |
| C1d          | 64.63  | 69.26  | 1.32 | 1.51 |
| Galr1        | 2.04   | 2.33   | 1.31 | 1.62 |
| Tmem185b     | 6.35   | 7.50   | 1.31 | 1.57 |
| Morc4        | 2.79   | 3.04   | 1.31 | 1.50 |
| Fam46a       | 10.14  | 12.23  | 1.30 | 1.69 |
| Gfra1        | 8.37   | 9.79   | 1.30 | 1.59 |
| Emb          | 17.16  | 19.33  | 1.30 | 1.54 |
| Itk          | 0.32   | 0.32   | 1.30 | 1.57 |
| Cpa5         | 0.14   | 0.20   | 1.29 | 3.21 |
| Atp2c2       | 0.53   | 0.62   | 1.29 | 1.68 |
| Hspa13       | 15.90  | 19.34  | 1.28 | 1.53 |
| Pld6         | 2.56   | 2.76   | 1.27 | 1.55 |
| Magohb       | 19.08  | 19.22  | 1.27 | 1.63 |
| Cldn26       | 2.77   | 3.38   | 1.27 | 1.52 |

|              |       |       |      |      |
|--------------|-------|-------|------|------|
| Tmem74       | 3.63  | 4.63  | 1.26 | 1.55 |
| Sv2c         | 3.20  | 3.89  | 1.26 | 1.65 |
| Rad51c       | 3.11  | 3.21  | 1.25 | 1.51 |
| Rgn          | 1.29  | 1.32  | 1.24 | 1.61 |
| BC051628     | 0.74  | 0.68  | 1.24 | 1.84 |
| Gpr6         | 2.09  | 2.05  | 1.23 | 1.61 |
| Gm17660      | 1.62  | 1.57  | 1.22 | 1.98 |
| St8sia4      | 6.28  | 7.62  | 1.22 | 1.56 |
| 2900056M20R  | 31.69 | 37.13 | 1.21 | 1.50 |
| C130060K24R  | 0.78  | 0.92  | 1.21 | 1.51 |
| Rspo4        | 0.51  | 0.77  | 1.19 | 2.02 |
| 4930524B15R  | 0.92  | 1.11  | 1.17 | 1.80 |
| Bpifb1       | 0.90  | 1.02  | 1.16 | 1.60 |
| AA467197     | 0.55  | 0.25  | 1.16 | 0.38 |
| 4932441J04Ri | 1.32  | 1.48  | 1.15 | 1.74 |
| Hctr2        | 2.53  | 3.36  | 1.15 | 1.60 |
| Npcd         | 30.72 | 45.94 | 1.13 | 1.50 |
| Dnajc22      | 0.31  | 0.47  | 1.11 | 2.33 |
| 4930441O14R  | 2.18  | 2.41  | 1.10 | 1.56 |
| Rps15a-ps4   | 3.44  | 3.83  | 1.10 | 1.81 |
| Npy5r        | 2.30  | 2.75  | 1.06 | 1.51 |
| Stc2         | 0.36  | 0.22  | 1.05 | 0.51 |
| Gm14634      | 1.53  | 1.87  | 1.05 | 1.53 |
| Socs3        | 0.89  | 0.54  | 0.99 | 0.50 |
| 2310046A06R  | 1.28  | 1.17  | 0.98 | 0.62 |
| Gpr139       | 1.17  | 1.57  | 0.97 | 2.09 |
| Gm11549      | 0.13  | 0.14  | 0.97 | 0.36 |
| Slc10a1      | 0.21  | 0.12  | 0.96 | 0.46 |
| Gpr115       | 0.11  | 0.13  | 0.95 | 0.53 |
| Atp6ap1l     | 0.77  | 0.70  | 0.95 | 0.52 |
| Crybb3       | 0.83  | 0.68  | 0.94 | 0.57 |
| Pla2g2d      | 0.19  | 0.10  | 0.94 | 0.47 |
| Trpa1        | 0.11  | 0.19  | 0.93 | 1.69 |
| Kank4        | 2.78  | 0.83  | 0.93 | 0.59 |
| Cchcr1       | 0.53  | 0.50  | 0.93 | 0.62 |
| Irf9         | 4.28  | 3.21  | 0.92 | 0.64 |
| Kcns1        | 0.68  | 0.48  | 0.91 | 0.58 |
| Rspo2        | 0.46  | 0.33  | 0.91 | 0.50 |
| Nkx3-1       | 0.08  | 0.06  | 0.90 | 0.38 |
| Tysnd1       | 7.34  | 5.71  | 0.90 | 0.64 |
| Nmbr         | 1.14  | 1.18  | 0.90 | 0.63 |
| Skor1        | 0.41  | 0.25  | 0.90 | 0.50 |
| Mfap4        | 0.24  | 0.16  | 0.89 | 0.33 |
| 4833412C05Ri | 0.21  | 0.13  | 0.89 | 0.35 |
| Serinc2      | 0.21  | 0.14  | 0.88 | 0.41 |
| Zmynd12      | 0.33  | 0.15  | 0.88 | 0.44 |
| Adrb3        | 0.62  | 0.43  | 0.88 | 0.66 |
| Rrm2         | 0.46  | 0.25  | 0.88 | 0.56 |
| Rassf10      | 0.68  | 0.48  | 0.87 | 0.58 |
| Gm12522      | 0.45  | 0.37  | 0.86 | 0.64 |
| Timeless     | 0.66  | 0.50  | 0.86 | 0.61 |
| Arhgap15     | 1.16  | 1.19  | 0.85 | 0.61 |
| Gm18756      | 0.27  | 0.26  | 0.85 | 0.62 |
| A4galt       | 0.28  | 0.24  | 0.85 | 0.59 |
| Dusp27       | 0.10  | 0.06  | 0.84 | 0.38 |
| Slc16a5      | 0.43  | 0.34  | 0.84 | 0.60 |
| Prdm8        | 2.77  | 2.68  | 0.84 | 0.63 |
| Klra2        | 0.06  | 0.05  | 0.84 | 0.29 |
| Ifit1        | 0.87  | 0.66  | 0.83 | 0.60 |
| Egr4         | 1.41  | 1.44  | 0.83 | 0.65 |
| 2410006H16R  | 74.44 | 65.11 | 0.83 | 0.66 |
| Zbtb8a       | 1.28  | 1.01  | 0.82 | 0.66 |
| Kbtbd5       | 0.60  | 0.41  | 0.82 | 0.58 |
| Atf3         | 0.56  | 0.31  | 0.81 | 0.52 |
| Pilra        | 0.56  | 0.47  | 0.80 | 0.51 |

|              |       |       |      |      |
|--------------|-------|-------|------|------|
| AA388235     | 1.97  | 1.44  | 0.79 | 0.65 |
| Egr3         | 1.14  | 0.92  | 0.79 | 0.59 |
| Gng13        | 46.20 | 43.63 | 0.79 | 0.65 |
| Nov          | 2.64  | 2.86  | 0.78 | 0.66 |
| Mafb         | 2.05  | 1.88  | 0.78 | 0.58 |
| Tbx15        | 0.07  | 0.02  | 0.78 | 0.13 |
| BC021767     | 0.24  | 0.15  | 0.78 | 0.47 |
| Egln3        | 2.54  | 2.18  | 0.78 | 0.63 |
| Myom1        | 0.19  | 0.18  | 0.77 | 0.52 |
| Ankrd33b     | 0.52  | 0.48  | 0.77 | 0.53 |
| Smoc2        | 0.19  | 0.20  | 0.77 | 0.49 |
| Ccdc155      | 0.24  | 0.19  | 0.77 | 0.51 |
| Samd7        | 0.38  | 0.42  | 0.77 | 0.63 |
| Plp2         | 3.01  | 2.79  | 0.77 | 0.64 |
| Rbm46        | 0.30  | 0.15  | 0.77 | 0.33 |
| H2-Q6        | 0.13  | 0.10  | 0.76 | 0.33 |
| Arg1         | 0.13  | 0.10  | 0.76 | 0.29 |
| Slc25a31     | 0.13  | 0.48  | 0.76 | 2.46 |
| Oscar        | 0.85  | 0.78  | 0.76 | 0.60 |
| Dzip1l       | 2.89  | 2.75  | 0.76 | 0.66 |
| Impa2        | 1.63  | 1.31  | 0.76 | 0.62 |
| Mgat5b       | 4.95  | 5.14  | 0.76 | 0.64 |
| Tyms         | 1.05  | 0.75  | 0.76 | 0.61 |
| Cib1         | 12.79 | 10.86 | 0.75 | 0.60 |
| BC049352     | 0.44  | 0.43  | 0.75 | 0.61 |
| Slc12a8      | 0.21  | 0.19  | 0.75 | 0.45 |
| Cep135       | 1.47  | 1.17  | 0.75 | 0.62 |
| C3           | 0.29  | 0.28  | 0.75 | 0.61 |
| Asb2         | 0.70  | 0.59  | 0.75 | 0.64 |
| B230312C02R  | 0.47  | 0.33  | 0.75 | 0.54 |
| Speg         | 9.88  | 8.75  | 0.74 | 0.62 |
| 1700012D14R  | 0.97  | 0.49  | 0.74 | 0.45 |
| Kcnk4        | 1.39  | 1.10  | 0.74 | 0.65 |
| Btbd17       | 2.28  | 1.92  | 0.74 | 0.66 |
| Psmb8        | 1.95  | 1.45  | 0.74 | 0.60 |
| Adamts15     | 0.60  | 0.58  | 0.74 | 0.62 |
| Bmp8b        | 0.27  | 0.19  | 0.74 | 0.46 |
| Mllt1        | 8.00  | 7.45  | 0.74 | 0.65 |
| Fgl2         | 0.55  | 0.36  | 0.74 | 0.43 |
| Gm11961      | 0.08  | 0.04  | 0.73 | 0.18 |
| Npnt         | 1.14  | 0.89  | 0.73 | 0.56 |
| Trim7        | 1.15  | 1.13  | 0.73 | 0.66 |
| Arhgap23     | 14.66 | 13.37 | 0.73 | 0.66 |
| Pstpip1      | 0.62  | 0.52  | 0.72 | 0.53 |
| A930024E05R  | 0.74  | 0.63  | 0.72 | 0.57 |
| Slc35d3      | 0.94  | 0.84  | 0.72 | 0.63 |
| Itпка        | 5.03  | 4.43  | 0.72 | 0.55 |
| Zfp114       | 0.55  | 0.55  | 0.72 | 0.59 |
| 1700025N23R  | 0.33  | 0.23  | 0.72 | 0.34 |
| 1500012F01Ri | 75.76 | 63.83 | 0.72 | 0.63 |
| Hspb8        | 9.61  | 8.30  | 0.72 | 0.63 |
| Zbtb42       | 0.21  | 0.14  | 0.72 | 0.49 |
| Gm7609       | 0.69  | 0.62  | 0.72 | 0.59 |
| Plekha4      | 0.26  | 0.25  | 0.72 | 0.60 |
| Kif26a       | 0.88  | 0.74  | 0.71 | 0.62 |
| Zfp503       | 3.35  | 2.67  | 0.71 | 0.64 |
| Hs3st1       | 3.58  | 3.97  | 0.71 | 0.65 |
| D2Ertd750e   | 0.15  | 0.12  | 0.71 | 0.46 |
| Card9        | 1.04  | 0.90  | 0.71 | 0.62 |
| Gpsm1        | 18.55 | 16.94 | 0.71 | 0.65 |
| Tpst2        | 5.67  | 5.25  | 0.71 | 0.66 |
| Ttc38        | 1.77  | 1.56  | 0.71 | 0.65 |
| Gm12942      | 3.34  | 2.75  | 0.71 | 0.57 |
| Kcnn1        | 1.29  | 1.22  | 0.71 | 0.66 |
| Gbp9         | 0.23  | 0.11  | 0.71 | 0.39 |

|             |        |        |      |      |
|-------------|--------|--------|------|------|
| Ifih1       | 0.35   | 0.33   | 0.71 | 0.64 |
| Spcb4       | 14.55  | 12.80  | 0.71 | 0.63 |
| Pspb        | 6.69   | 5.96   | 0.71 | 0.65 |
| Enho        | 37.01  | 31.28  | 0.70 | 0.58 |
| Wdr76       | 0.49   | 0.54   | 0.70 | 0.63 |
| Kif9        | 1.79   | 1.50   | 0.70 | 0.64 |
| 9530077C05R | 5.50   | 4.77   | 0.70 | 0.58 |
| Actn4       | 10.39  | 9.69   | 0.70 | 0.66 |
| Dysf        | 0.63   | 0.67   | 0.70 | 0.65 |
| Klh14       | 0.94   | 0.86   | 0.70 | 0.61 |
| Wdr60       | 3.22   | 2.83   | 0.70 | 0.66 |
| Mapk15      | 0.77   | 0.53   | 0.70 | 0.44 |
| Capn1       | 2.60   | 2.53   | 0.70 | 0.63 |
| Prickle3    | 0.25   | 0.14   | 0.70 | 0.32 |
| Abi3bp      | 0.28   | 0.27   | 0.70 | 0.66 |
| Bcl11b      | 2.35   | 2.19   | 0.70 | 0.64 |
| Plin2       | 3.50   | 3.09   | 0.70 | 0.61 |
| Dnmt3b      | 0.07   | 0.05   | 0.69 | 0.30 |
| Jup         | 4.24   | 3.96   | 0.69 | 0.66 |
| Chka        | 21.13  | 19.12  | 0.69 | 0.64 |
| Sytl5       | 0.44   | 0.38   | 0.69 | 0.56 |
| 1700027A23R | 3.52   | 2.75   | 0.69 | 0.61 |
| Nptx2       | 5.24   | 5.05   | 0.69 | 0.60 |
| Ifi271l     | 15.95  | 14.43  | 0.69 | 0.61 |
| 4933412O06R | 0.93   | 0.99   | 0.69 | 0.61 |
| Tmem67      | 1.96   | 1.99   | 0.69 | 0.66 |
| Ppp1r3d     | 1.64   | 1.64   | 0.69 | 0.64 |
| Tdrd3       | 5.71   | 5.19   | 0.69 | 0.64 |
| 5730508B09R | 1.06   | 0.96   | 0.69 | 0.62 |
| Calr3       | 1.31   | 1.12   | 0.69 | 0.65 |
| 4932418E24R | 0.45   | 0.40   | 0.69 | 0.49 |
| Spata20     | 0.10   | 0.08   | 0.68 | 0.47 |
| Slco4a1     | 0.39   | 0.31   | 0.68 | 0.48 |
| Ii18        | 15.41  | 13.11  | 0.68 | 0.57 |
| Hrh2        | 1.00   | 1.17   | 0.68 | 0.64 |
| Fam57a      | 3.13   | 2.94   | 0.68 | 0.60 |
| Rps12       | 679.27 | 570.71 | 0.68 | 0.59 |
| Shroom3     | 0.44   | 0.38   | 0.68 | 0.53 |
| Amot        | 1.37   | 1.41   | 0.68 | 0.66 |
| Rnf182      | 2.35   | 2.36   | 0.68 | 0.63 |
| Morc2b      | 0.14   | 0.08   | 0.68 | 0.51 |
| Ccdc42      | 1.67   | 1.30   | 0.68 | 0.35 |
| 1700001C02R | 1.49   | 1.00   | 0.68 | 0.36 |
| Trim17      | 1.20   | 0.74   | 0.68 | 0.56 |
| Wnk4        | 0.38   | 0.40   | 0.68 | 0.61 |
| Aldh1a3     | 0.25   | 0.21   | 0.68 | 0.59 |
| Casp1       | 0.81   | 0.72   | 0.68 | 0.52 |
| Chrd1l      | 0.32   | 0.27   | 0.68 | 0.42 |
| Chrm1       | 1.01   | 1.24   | 0.68 | 0.62 |
| Deaf1       | 22.20  | 20.82  | 0.68 | 0.63 |
| Psmb11      | 0.15   | 0.07   | 0.68 | 0.39 |
| Heatr5a     | 1.92   | 1.84   | 0.68 | 0.63 |
| Akr1b8      | 0.72   | 0.28   | 0.67 | 0.31 |
| Chst14      | 0.36   | 0.29   | 0.67 | 0.43 |
| Trip10      | 1.26   | 1.14   | 0.67 | 0.59 |
| Hmg20b      | 4.12   | 3.25   | 0.67 | 0.52 |
| Lhx2        | 3.76   | 3.57   | 0.67 | 0.60 |
| BC060267    | 1.45   | 1.36   | 0.67 | 0.62 |
| 9430037G07R | 0.73   | 0.61   | 0.67 | 0.59 |
| Ticam1      | 1.01   | 0.96   | 0.67 | 0.57 |
| Efcab6      | 0.57   | 0.64   | 0.67 | 0.66 |
| Plscr1      | 1.03   | 0.98   | 0.67 | 0.63 |
| Snhg7       | 8.58   | 8.70   | 0.67 | 0.64 |
| Fhdc1       | 0.91   | 0.87   | 0.67 | 0.62 |
| Xylt1       | 0.83   | 0.89   | 0.67 | 0.64 |

|              |       |       |      |      |
|--------------|-------|-------|------|------|
| Nr2f1        | 15.19 | 13.91 | 0.67 | 0.57 |
| Syt2         | 2.47  | 2.63  | 0.67 | 0.67 |
| Gm505        | 2.50  | 2.16  | 0.67 | 0.63 |
| Arhgap22     | 2.28  | 2.00  | 0.67 | 0.67 |
| Shisa4       | 25.40 | 25.77 | 0.67 | 0.59 |
| D930014E17R  | 3.27  | 3.05  | 0.67 | 0.63 |
| Lgr5         | 0.43  | 0.41  | 0.67 | 0.64 |
| Serpinf1     | 2.63  | 2.89  | 0.67 | 0.70 |
| A330102110Ri | 5.16  | 5.04  | 0.67 | 0.74 |
| Slc2a1       | 4.32  | 5.53  | 0.67 | 0.74 |
| Pcyt1b       | 8.14  | 8.15  | 0.67 | 0.67 |
| Sqrdl        | 2.38  | 2.88  | 0.67 | 0.72 |
| Unc79        | 4.09  | 4.00  | 0.67 | 0.68 |
| Frem3        | 0.29  | 0.29  | 0.67 | 0.61 |
| Ophn1        | 5.91  | 5.72  | 0.67 | 0.65 |
| Lig3         | 2.32  | 2.36  | 0.67 | 0.65 |
| 2300009A05R  | 19.14 | 17.16 | 0.67 | 0.60 |
| Kncn         | 0.31  | 0.37  | 0.67 | 2.77 |
| Srek1        | 12.19 | 12.69 | 0.67 | 0.71 |
| 1110032A04R  | 2.69  | 2.78  | 0.66 | 0.72 |
| Apol8        | 1.01  | 1.30  | 0.66 | 0.82 |
| Mxd1         | 3.38  | 3.38  | 0.66 | 0.65 |
| Fam181a      | 2.32  | 1.83  | 0.66 | 0.54 |
| Actn2        | 1.33  | 1.27  | 0.66 | 0.66 |
| Crat         | 4.63  | 4.58  | 0.66 | 0.67 |
| Nek1         | 6.83  | 7.37  | 0.66 | 0.76 |
| Etv6         | 1.59  | 1.44  | 0.66 | 0.66 |
| AI854517     | 2.76  | 2.44  | 0.66 | 0.58 |
| Dhcr7        | 5.57  | 6.01  | 0.66 | 0.73 |
| E2f1         | 0.85  | 0.72  | 0.66 | 0.47 |
| BC030336     | 14.00 | 15.59 | 0.66 | 0.77 |
| Ddx17        | 96.28 | 96.04 | 0.66 | 0.69 |
| D19Wsu162e   | 4.71  | 4.77  | 0.66 | 0.65 |
| Gm20257      | 0.55  | 0.58  | 0.66 | 0.58 |
| Nek8         | 0.68  | 0.53  | 0.66 | 0.56 |
| Hipk2        | 1.59  | 1.58  | 0.66 | 0.66 |
| 4931406P16R  | 5.13  | 5.31  | 0.66 | 0.74 |
| Npat         | 3.13  | 3.35  | 0.66 | 0.74 |
| Tctn3        | 3.08  | 3.42  | 0.66 | 0.79 |
| Rnf138       | 6.51  | 7.92  | 0.66 | 0.91 |
| Evc2         | 0.72  | 0.77  | 0.66 | 0.60 |
| Pafah2       | 1.87  | 1.71  | 0.66 | 0.63 |
| Rlf          | 3.31  | 3.30  | 0.66 | 0.72 |
| Cramp1l      | 3.12  | 3.15  | 0.66 | 0.69 |
| Eps8l2       | 0.36  | 0.31  | 0.66 | 0.54 |
| Otud4        | 6.88  | 7.49  | 0.66 | 0.79 |
| Fam131b      | 12.65 | 13.74 | 0.66 | 0.67 |
| Cox6b2       | 3.15  | 2.56  | 0.66 | 0.40 |
| Prkd2        | 0.75  | 0.74  | 0.66 | 0.56 |
| Uggt1        | 2.48  | 3.04  | 0.66 | 0.79 |
| D4Erttd22e   | 7.36  | 7.12  | 0.66 | 0.64 |
| Casp2        | 3.14  | 3.36  | 0.66 | 0.70 |
| Tiparp       | 3.33  | 3.15  | 0.66 | 0.71 |
| Klf9         | 13.45 | 13.94 | 0.66 | 0.69 |
| Pcnxl2       | 2.25  | 2.37  | 0.66 | 0.65 |
| Npr1         | 0.16  | 0.20  | 0.66 | 0.62 |
| Zbtb1        | 1.94  | 2.09  | 0.66 | 0.80 |
| Cnot6        | 8.83  | 10.03 | 0.66 | 0.79 |
| Heatr2       | 2.07  | 1.98  | 0.66 | 0.68 |
| Fam45a       | 29.61 | 31.31 | 0.66 | 0.76 |
| Creb3l2      | 1.03  | 1.29  | 0.66 | 0.76 |
| 6430706D22R  | 3.52  | 4.22  | 0.66 | 0.76 |
| Ldlr         | 2.90  | 3.28  | 0.66 | 0.75 |
| Nek7         | 8.83  | 9.53  | 0.66 | 0.74 |
| Ccdc163      | 1.20  | 1.10  | 0.66 | 0.66 |

|              |        |        |      |      |
|--------------|--------|--------|------|------|
| Mxi1         | 10.20  | 10.29  | 0.66 | 0.67 |
| Rasa2        | 3.94   | 4.07   | 0.66 | 0.73 |
| Nqo1         | 2.72   | 3.06   | 0.66 | 0.63 |
| Casp9        | 4.97   | 4.93   | 0.66 | 0.69 |
| Samd3        | 2.00   | 1.46   | 0.66 | 0.53 |
| 2010106G01R  | 4.02   | 4.56   | 0.66 | 0.75 |
| Zfp160       | 4.71   | 5.08   | 0.66 | 0.72 |
| Sik          | 6.74   | 6.93   | 0.66 | 0.68 |
| Zc3h7a       | 5.73   | 5.71   | 0.66 | 0.71 |
| Usp3         | 3.45   | 3.54   | 0.66 | 0.77 |
| Fam63a       | 4.52   | 4.72   | 0.66 | 0.66 |
| Diap2        | 1.41   | 1.38   | 0.66 | 0.67 |
| Kif6         | 0.69   | 0.56   | 0.66 | 0.54 |
| Lhpp         | 5.92   | 5.52   | 0.66 | 0.62 |
| Lrrc8b       | 2.11   | 2.51   | 0.66 | 0.74 |
| Snhg8        | 14.26  | 12.14  | 0.66 | 0.58 |
| BC030476     | 0.07   | 0.04   | 0.66 | 0.20 |
| Zfp113       | 1.26   | 1.28   | 0.66 | 0.67 |
| Tsga10       | 1.29   | 1.11   | 0.66 | 0.62 |
| Wnt3         | 1.30   | 1.20   | 0.66 | 0.66 |
| G0s2         | 4.94   | 5.02   | 0.66 | 0.66 |
| Tgm7         | 0.21   | 0.12   | 0.66 | 0.47 |
| Igdcc4       | 3.64   | 4.05   | 0.66 | 0.73 |
| Pvt1         | 2.08   | 2.09   | 0.66 | 0.75 |
| Pus7         | 3.95   | 4.25   | 0.66 | 0.72 |
| Sertad2      | 2.69   | 2.77   | 0.66 | 0.71 |
| Per3         | 5.22   | 5.68   | 0.66 | 0.69 |
| Ptn          | 14.68  | 16.99  | 0.66 | 0.76 |
| 1110020G09R  | 13.48  | 13.56  | 0.66 | 0.72 |
| Rgs16        | 14.82  | 13.36  | 0.66 | 0.62 |
| Nlrc3        | 0.19   | 0.15   | 0.65 | 0.45 |
| A430035B10R  | 1.09   | 0.96   | 0.65 | 0.50 |
| Acot2        | 1.76   | 1.70   | 0.65 | 0.60 |
| Zfhx4        | 2.82   | 2.76   | 0.65 | 0.65 |
| Elmo3        | 0.90   | 0.98   | 0.65 | 0.76 |
| Zfp871       | 10.17  | 10.39  | 0.65 | 0.71 |
| H2-Eb1       | 0.74   | 0.75   | 0.65 | 0.44 |
| Qdpr         | 172.60 | 166.51 | 0.65 | 0.64 |
| 2210404J11Ri | 3.11   | 3.14   | 0.65 | 0.71 |
| Nlr1         | 0.88   | 0.86   | 0.65 | 0.67 |
| Furin        | 1.83   | 2.07   | 0.65 | 0.71 |
| Ankrd10      | 24.32  | 23.60  | 0.65 | 0.69 |
| Pcp4l1       | 48.13  | 50.46  | 0.65 | 0.72 |
| Gm14325      | 3.85   | 4.26   | 0.65 | 0.76 |
| Akap1        | 3.37   | 3.68   | 0.65 | 0.73 |
| Srpx2        | 0.10   | 0.10   | 0.65 | 0.54 |
| 2610015P09R  | 1.18   | 1.26   | 0.65 | 0.73 |
| Scn3a        | 4.29   | 4.89   | 0.65 | 0.82 |
| Rnf141       | 12.35  | 12.25  | 0.65 | 0.69 |
| Zfp287       | 2.95   | 3.13   | 0.65 | 0.74 |
| Dync2h1      | 3.97   | 3.96   | 0.65 | 0.69 |
| Tnfsf12      | 3.30   | 3.67   | 0.65 | 0.71 |
| Hfm1         | 0.64   | 0.44   | 0.65 | 0.44 |
| Tmem161b     | 4.99   | 5.91   | 0.65 | 0.87 |
| Trp53inp1    | 3.07   | 2.94   | 0.65 | 0.65 |
| Purb         | 59.64  | 60.69  | 0.65 | 0.69 |
| Rgs11        | 1.71   | 1.64   | 0.65 | 0.75 |
| Spry1        | 3.38   | 3.27   | 0.65 | 0.72 |
| Gpatch8      | 7.24   | 7.55   | 0.65 | 0.66 |
| Zfhx2        | 3.06   | 3.23   | 0.65 | 0.67 |
| Cav2         | 11.28  | 11.55  | 0.65 | 0.72 |
| B3gat1       | 19.46  | 20.62  | 0.65 | 0.69 |
| Gm16702      | 4.78   | 5.29   | 0.65 | 0.72 |
| Tmem120b     | 1.28   | 1.53   | 0.65 | 0.75 |
| Zfyve27      | 6.07   | 7.27   | 0.65 | 0.75 |



|              |       |       |      |      |
|--------------|-------|-------|------|------|
| Pacs2        | 23.98 | 23.40 | 0.65 | 0.63 |
| Extl1        | 2.44  | 2.18  | 0.65 | 0.61 |
| Rras         | 5.72  | 5.66  | 0.65 | 0.66 |
| Aste1        | 1.47  | 1.39  | 0.65 | 0.61 |
| Nr1h3        | 0.94  | 0.89  | 0.65 | 0.59 |
| Palld        | 0.38  | 0.33  | 0.65 | 0.63 |
| Arc          | 2.85  | 2.52  | 0.65 | 0.60 |
| Whamm        | 3.15  | 3.32  | 0.65 | 0.60 |
| Pdlim5       | 6.74  | 6.80  | 0.65 | 0.69 |
| Mocs1        | 2.71  | 2.75  | 0.65 | 0.71 |
| Dock9        | 8.16  | 8.31  | 0.65 | 0.69 |
| Zbtb43       | 3.83  | 3.88  | 0.65 | 0.67 |
| Rassf3       | 2.53  | 2.49  | 0.65 | 0.59 |
| Fzd1         | 1.47  | 1.76  | 0.65 | 0.64 |
| Zfp459       | 0.50  | 0.58  | 0.64 | 0.77 |
| Tnfaip3      | 0.37  | 0.47  | 0.64 | 0.87 |
| Dtwd2        | 1.12  | 1.20  | 0.64 | 0.71 |
| Gna13        | 8.90  | 8.82  | 0.64 | 0.65 |
| Mef2c        | 6.37  | 6.35  | 0.64 | 0.56 |
| Rps19-ps3    | 2.50  | 2.94  | 0.64 | 0.53 |
| Yes1         | 2.53  | 2.82  | 0.64 | 0.78 |
| Cyb561d1     | 1.65  | 1.74  | 0.64 | 0.63 |
| Htr4         | 0.48  | 0.67  | 0.64 | 1.02 |
| B2m          | 29.11 | 31.43 | 0.64 | 0.66 |
| Ell2         | 6.21  | 6.71  | 0.64 | 0.72 |
| 2610008E11Ri | 5.91  | 6.14  | 0.64 | 0.73 |
| Efcab4a      | 0.38  | 0.38  | 0.64 | 0.47 |
| Cenpb        | 18.84 | 17.57 | 0.64 | 0.61 |
| Zdhhc1       | 7.32  | 7.62  | 0.64 | 0.68 |
| Angel1       | 0.92  | 1.00  | 0.64 | 0.64 |
| Bcat2        | 3.94  | 3.63  | 0.64 | 0.67 |
| Ntrk2        | 17.01 | 20.26 | 0.64 | 0.71 |
| Slc39a14     | 2.46  | 2.76  | 0.64 | 0.70 |
| Ankrd49      | 4.50  | 4.89  | 0.64 | 0.72 |
| Gadd45b      | 2.46  | 2.48  | 0.64 | 0.60 |
| Hecw2        | 2.56  | 2.61  | 0.64 | 0.71 |
| Spata13      | 1.25  | 1.13  | 0.64 | 0.67 |
| Zfp715       | 6.90  | 6.95  | 0.64 | 0.69 |
| 5330437I02Ri | 0.25  | 0.24  | 0.64 | 0.57 |
| Ctnna1       | 14.02 | 13.49 | 0.64 | 0.67 |
| Ankrd13a     | 10.38 | 10.91 | 0.64 | 0.66 |
| Stk40        | 4.19  | 4.16  | 0.64 | 0.64 |
| Mfap3l       | 2.11  | 2.46  | 0.64 | 0.76 |
| AI429214     | 2.16  | 1.69  | 0.64 | 0.63 |
| Gpcpd1       | 15.54 | 16.45 | 0.64 | 0.73 |
| Zfyve26      | 1.41  | 1.36  | 0.64 | 0.61 |
| Rassf4       | 2.69  | 2.55  | 0.64 | 0.65 |
| Tmem189      | 8.50  | 8.59  | 0.64 | 0.62 |
| 4930503L19Ri | 1.87  | 1.83  | 0.64 | 0.69 |
| Igfbp4       | 2.20  | 2.27  | 0.64 | 0.59 |
| Igfbp5       | 11.56 | 12.46 | 0.64 | 0.65 |
| Slc22a15     | 1.06  | 1.27  | 0.64 | 0.89 |
| Pot1b        | 1.54  | 1.34  | 0.64 | 0.64 |
| Rhpn2        | 1.59  | 1.63  | 0.64 | 0.62 |
| Nkain2       | 8.62  | 9.64  | 0.64 | 0.66 |
| Lrrn1        | 5.65  | 7.14  | 0.64 | 0.74 |
| 2310010J17Ri | 7.49  | 7.27  | 0.64 | 0.62 |
| Frmf6        | 1.92  | 2.01  | 0.64 | 0.68 |
| Maml1        | 1.10  | 1.06  | 0.64 | 0.64 |
| 5730577I03Ri | 1.80  | 1.69  | 0.64 | 0.63 |
| Ncoa6        | 4.49  | 4.68  | 0.64 | 0.64 |
| DOH4S114     | 29.35 | 30.05 | 0.64 | 0.69 |
| Farp1        | 5.74  | 5.36  | 0.64 | 0.57 |
| Ncaph        | 0.19  | 0.19  | 0.64 | 0.57 |
| Zdhhc18      | 3.30  | 3.76  | 0.64 | 0.71 |

|              |       |       |      |      |
|--------------|-------|-------|------|------|
| Grm4         | 2.41  | 2.27  | 0.64 | 0.66 |
| Tcf12        | 7.77  | 8.00  | 0.63 | 0.67 |
| Mars2        | 2.76  | 2.76  | 0.63 | 0.75 |
| Tmem134      | 8.80  | 8.60  | 0.63 | 0.61 |
| Cpd          | 3.33  | 3.97  | 0.63 | 0.72 |
| Casp7        | 1.33  | 1.27  | 0.63 | 0.86 |
| Gpr116       | 0.33  | 0.61  | 0.63 | 1.00 |
| Ank          | 24.56 | 26.27 | 0.63 | 0.67 |
| Abl1         | 5.58  | 5.66  | 0.63 | 0.64 |
| Tbl1xr1      | 5.74  | 6.03  | 0.63 | 0.67 |
| Msi1         | 7.55  | 7.37  | 0.63 | 0.65 |
| Fam135a      | 4.36  | 4.35  | 0.63 | 0.68 |
| Fbxo30       | 2.26  | 2.48  | 0.63 | 0.77 |
| Adra1a       | 0.62  | 0.53  | 0.63 | 0.58 |
| Clec18a      | 0.21  | 0.24  | 0.63 | 0.50 |
| Sirt2        | 54.03 | 51.53 | 0.63 | 0.61 |
| Arhgap21     | 8.86  | 8.62  | 0.63 | 0.64 |
| Mga          | 4.18  | 4.30  | 0.63 | 0.70 |
| Pomt2        | 1.58  | 1.61  | 0.63 | 0.57 |
| 0610010B08R  | 0.56  | 0.60  | 0.63 | 0.73 |
| Ctcf1        | 0.17  | 0.13  | 0.63 | 0.48 |
| Fam40b       | 2.53  | 2.62  | 0.63 | 0.73 |
| AI606473     | 1.01  | 0.49  | 0.63 | 0.55 |
| Npl          | 2.18  | 1.88  | 0.63 | 0.56 |
| Zscan20      | 0.66  | 0.58  | 0.63 | 0.51 |
| Acsl6        | 13.82 | 15.45 | 0.63 | 0.69 |
| Rtel1        | 1.57  | 1.59  | 0.63 | 0.65 |
| Gm13251      | 0.59  | 0.86  | 0.63 | 0.83 |
| Cep97        | 2.13  | 2.18  | 0.63 | 0.76 |
| Chek2        | 1.46  | 1.36  | 0.63 | 0.67 |
| Msn          | 3.48  | 3.67  | 0.63 | 0.72 |
| 9930012K11R  | 1.00  | 0.95  | 0.63 | 0.73 |
| Id2          | 42.11 | 40.69 | 0.63 | 0.67 |
| Cln3         | 1.33  | 1.30  | 0.63 | 0.54 |
| Fam105a      | 1.57  | 1.85  | 0.63 | 0.82 |
| Ccnj1        | 0.48  | 0.45  | 0.63 | 0.55 |
| 2810046L04Ri | 2.63  | 2.53  | 0.63 | 0.63 |
| Efcab5       | 0.36  | 0.37  | 0.63 | 0.70 |
| Kctd12b      | 1.43  | 2.06  | 0.63 | 0.91 |
| Cd68         | 0.83  | 1.02  | 0.63 | 0.66 |
| Otud3        | 1.93  | 1.62  | 0.63 | 0.57 |
| Fam107a      | 22.63 | 26.30 | 0.63 | 0.65 |
| Ankrd40      | 23.53 | 23.76 | 0.63 | 0.63 |
| Slc25a13     | 1.25  | 1.10  | 0.63 | 0.53 |
| Mapk4        | 5.58  | 6.00  | 0.63 | 0.60 |
| Ncoa3        | 2.65  | 2.69  | 0.63 | 0.62 |
| Pgm1         | 2.27  | 2.39  | 0.63 | 0.67 |
| Sfrp4        | 0.89  | 0.92  | 0.63 | 0.73 |
| Clic5        | 0.32  | 0.35  | 0.63 | 0.78 |
| Cnnm4        | 0.92  | 1.12  | 0.63 | 0.73 |
| Atf3         | 3.61  | 4.05  | 0.63 | 0.72 |
| 6330403A02R  | 8.90  | 9.89  | 0.63 | 0.60 |
| Ccnl1        | 8.73  | 8.96  | 0.63 | 0.69 |
| Sp8          | 1.28  | 1.03  | 0.63 | 0.59 |
| Ddx58        | 0.67  | 0.65  | 0.63 | 0.67 |
| Car11        | 16.94 | 17.05 | 0.63 | 0.60 |
| Brca1        | 0.22  | 0.20  | 0.63 | 0.69 |
| Eml5         | 8.73  | 9.21  | 0.63 | 0.69 |
| Kdm3b        | 4.08  | 3.99  | 0.63 | 0.58 |
| Ahrr         | 0.09  | 0.05  | 0.63 | 0.34 |
| Hmgb2        | 1.16  | 1.02  | 0.63 | 0.62 |
| Thoc2        | 4.39  | 4.55  | 0.63 | 0.71 |
| Gng5         | 48.48 | 43.39 | 0.62 | 0.58 |
| Dhx33        | 2.89  | 2.97  | 0.62 | 0.66 |
| Kcnj4        | 1.69  | 1.76  | 0.62 | 0.57 |

|              |       |       |      |      |
|--------------|-------|-------|------|------|
| Ercc6        | 2.01  | 2.17  | 0.62 | 0.69 |
| Sgms2        | 0.54  | 0.52  | 0.62 | 0.67 |
| Shroom1      | 0.92  | 0.99  | 0.62 | 0.68 |
| Poir3g       | 1.50  | 1.52  | 0.62 | 0.73 |
| Gm15800      | 11.82 | 11.30 | 0.62 | 0.61 |
| Cgn1         | 0.77  | 0.74  | 0.62 | 0.63 |
| Pth1r        | 1.74  | 1.66  | 0.62 | 0.57 |
| Trim67       | 1.11  | 1.06  | 0.62 | 0.68 |
| Hfe          | 0.40  | 0.41  | 0.62 | 0.64 |
| Ephx2        | 3.09  | 3.13  | 0.62 | 0.64 |
| Leprel2      | 1.79  | 1.83  | 0.62 | 0.63 |
| Fubp3        | 5.09  | 5.33  | 0.62 | 0.70 |
| Zfpm1        | 2.13  | 1.95  | 0.62 | 0.61 |
| Agrn         | 5.84  | 6.26  | 0.62 | 0.65 |
| Pisd-ps1     | 19.56 | 18.86 | 0.62 | 0.64 |
| Igf2bp3      | 0.44  | 0.43  | 0.62 | 0.72 |
| Thrsp        | 11.29 | 10.87 | 0.62 | 0.55 |
| Ascc2        | 3.23  | 3.08  | 0.62 | 0.67 |
| Olf613       | 5.71  | 5.79  | 0.62 | 0.66 |
| Il15ra       | 1.78  | 1.76  | 0.62 | 0.60 |
| Rarres1      | 0.15  | 0.14  | 0.62 | 0.27 |
| Calhm2       | 0.24  | 0.33  | 0.62 | 0.62 |
| 4930578N16R  | 0.95  | 1.19  | 0.62 | 0.80 |
| Lpar2        | 0.24  | 0.28  | 0.62 | 0.73 |
| Idua         | 2.66  | 2.77  | 0.62 | 0.77 |
| PIK1         | 0.59  | 0.62  | 0.62 | 0.67 |
| Insig1       | 18.31 | 18.02 | 0.62 | 0.65 |
| Kcna2        | 7.76  | 8.88  | 0.62 | 0.67 |
| Phf2011      | 5.45  | 5.93  | 0.62 | 0.70 |
| Iglon5       | 7.07  | 7.46  | 0.62 | 0.63 |
| Cast         | 1.87  | 2.01  | 0.62 | 0.71 |
| Clk4         | 13.42 | 13.67 | 0.62 | 0.71 |
| 0610007P08R  | 3.56  | 3.73  | 0.62 | 0.68 |
| Fam154b      | 0.95  | 0.85  | 0.62 | 0.75 |
| Chia         | 1.28  | 1.28  | 0.62 | 0.78 |
| Ccnd1        | 8.33  | 7.96  | 0.62 | 0.64 |
| Scube1       | 0.36  | 0.48  | 0.62 | 0.61 |
| Cela1        | 1.22  | 1.17  | 0.62 | 0.57 |
| 5430416N02R  | 6.55  | 6.08  | 0.62 | 0.64 |
| Barhl2       | 1.25  | 1.53  | 0.62 | 0.54 |
| 1500017E21Ri | 2.35  | 2.71  | 0.62 | 0.82 |
| D330050G23R  | 0.93  | 1.11  | 0.62 | 0.72 |
| Adam9        | 3.68  | 4.47  | 0.62 | 0.70 |
| Lama2        | 0.45  | 0.44  | 0.62 | 0.57 |
| Chfr         | 5.22  | 5.42  | 0.62 | 0.69 |
| Arhgef2      | 6.68  | 6.31  | 0.62 | 0.59 |
| Ifit2        | 3.02  | 2.88  | 0.62 | 0.59 |
| Acvr2b       | 1.13  | 1.22  | 0.62 | 0.79 |
| P2rx6        | 0.58  | 0.53  | 0.62 | 0.73 |
| C1qtnf1      | 0.34  | 0.55  | 0.62 | 0.83 |
| Celsr1       | 0.12  | 0.12  | 0.62 | 0.65 |
| Ccl19        | 0.65  | 0.97  | 0.62 | 0.51 |
| Rbks         | 1.45  | 1.22  | 0.62 | 0.62 |
| Kcnn2        | 3.95  | 4.34  | 0.62 | 0.66 |
| Prkcdbp      | 14.10 | 13.02 | 0.62 | 0.57 |
| Pik3c2a      | 2.93  | 2.97  | 0.62 | 0.66 |
| Nab1         | 4.97  | 5.36  | 0.62 | 0.69 |
| Tgds         | 2.11  | 2.14  | 0.62 | 0.78 |
| Tmem168      | 1.42  | 1.84  | 0.62 | 0.79 |
| Atp4a        | 0.39  | 0.32  | 0.62 | 0.65 |
| Lrg1         | 0.10  | 0.06  | 0.61 | 0.23 |
| Pros1        | 1.27  | 1.39  | 0.61 | 0.83 |
| Rfx7         | 4.70  | 4.82  | 0.61 | 0.63 |
| P2rx4        | 2.48  | 2.93  | 0.61 | 0.70 |
| Lats2        | 2.74  | 2.72  | 0.61 | 0.58 |

|              |       |       |      |      |
|--------------|-------|-------|------|------|
| Mob1a        | 3.93  | 3.91  | 0.61 | 0.65 |
| Aasdh        | 1.97  | 1.73  | 0.61 | 0.57 |
| Gm4951       | 0.07  | 0.09  | 0.61 | 0.43 |
| Abhd2        | 1.11  | 1.48  | 0.61 | 0.75 |
| Slc6a8       | 11.20 | 11.54 | 0.61 | 0.62 |
| Pi15         | 0.28  | 0.28  | 0.61 | 0.71 |
| Sypl         | 5.81  | 7.01  | 0.61 | 0.71 |
| Wipi1        | 5.79  | 5.55  | 0.61 | 0.60 |
| Nmi          | 1.85  | 1.60  | 0.61 | 0.59 |
| Cacna1a      | 4.72  | 5.10  | 0.61 | 0.63 |
| Rras2        | 2.87  | 2.82  | 0.61 | 0.65 |
| Pard3b       | 0.32  | 0.35  | 0.61 | 0.65 |
| Kctd5        | 8.38  | 7.98  | 0.61 | 0.59 |
| Lrig2        | 2.84  | 3.40  | 0.61 | 0.72 |
| Slc35d1      | 1.34  | 1.33  | 0.61 | 0.55 |
| Capsl        | 2.99  | 2.92  | 0.61 | 0.61 |
| 6720463M24R  | 0.76  | 0.70  | 0.61 | 0.64 |
| Fgf11        | 6.09  | 6.53  | 0.61 | 0.62 |
| Ampd3        | 5.66  | 5.45  | 0.61 | 0.57 |
| Fam117a      | 1.94  | 1.89  | 0.61 | 0.60 |
| Sox2         | 25.92 | 23.33 | 0.61 | 0.60 |
| C630043F03Ri | 2.82  | 2.86  | 0.61 | 0.74 |
| Elovl5       | 12.16 | 14.99 | 0.61 | 0.75 |
| Trdmt1       | 2.19  | 2.30  | 0.61 | 0.70 |
| Hus1         | 2.87  | 2.65  | 0.61 | 0.61 |
| Akap8        | 12.72 | 12.23 | 0.61 | 0.67 |
| Hs1bp3       | 3.18  | 2.98  | 0.61 | 0.62 |
| Psmb9        | 1.01  | 1.10  | 0.61 | 0.56 |
| 4930511M06R  | 1.68  | 1.74  | 0.61 | 0.62 |
| Nfam1        | 0.37  | 0.38  | 0.61 | 0.58 |
| Sym          | 3.92  | 3.67  | 0.61 | 0.61 |
| Alox8        | 1.37  | 1.54  | 0.61 | 0.68 |
| Klf8         | 1.28  | 1.21  | 0.61 | 0.63 |
| Cep250       | 2.88  | 2.74  | 0.61 | 0.61 |
| Wnt11        | 0.19  | 0.13  | 0.61 | 0.48 |
| Rhbdd1       | 1.26  | 1.55  | 0.61 | 0.75 |
| Fbxw10       | 0.22  | 0.18  | 0.61 | 0.60 |
| 1700067K01Ri | 0.25  | 0.13  | 0.61 | 0.32 |
| Anxa11       | 2.14  | 1.83  | 0.61 | 0.49 |
| LOC433374    | 0.24  | 0.18  | 0.61 | 0.47 |
| Sptlc1       | 4.46  | 4.75  | 0.61 | 0.67 |
| Fjx1         | 4.64  | 4.47  | 0.61 | 0.61 |
| AW549877     | 14.70 | 16.20 | 0.61 | 0.73 |
| Abcd1        | 2.06  | 2.02  | 0.61 | 0.58 |
| E330016A19R  | 0.16  | 0.18  | 0.61 | 0.51 |
| LOC626082    | 0.42  | 0.36  | 0.61 | 0.38 |
| Rhobtb1      | 0.54  | 0.59  | 0.61 | 0.67 |
| Taf4a        | 3.43  | 3.78  | 0.61 | 0.65 |
| Slc26a2      | 0.49  | 0.49  | 0.61 | 0.70 |
| Slc48a1      | 23.32 | 25.89 | 0.61 | 0.64 |
| Arrdc2       | 2.41  | 2.35  | 0.61 | 0.52 |
| Phtf2        | 1.89  | 2.02  | 0.61 | 0.64 |
| Sgk1         | 12.12 | 11.99 | 0.60 | 0.49 |
| Zfp959       | 1.65  | 1.92  | 0.60 | 0.72 |
| Trrap        | 5.85  | 5.53  | 0.60 | 0.59 |
| 1600020E01Ri | 7.50  | 8.75  | 0.60 | 0.71 |
| Map3k2       | 3.30  | 3.57  | 0.60 | 0.70 |
| March2       | 33.08 | 29.92 | 0.60 | 0.57 |
| Fam72a       | 0.64  | 0.59  | 0.60 | 0.58 |
| Gm8267       | 0.15  | 0.10  | 0.60 | 0.29 |
| Drd3         | 0.11  | 0.06  | 0.60 | 0.31 |
| Gas5         | 13.15 | 11.61 | 0.60 | 0.60 |
| Pex11c       | 0.37  | 0.28  | 0.60 | 0.51 |
| Stk36        | 0.68  | 0.60  | 0.60 | 0.57 |
| AW495222     | 1.14  | 1.04  | 0.60 | 0.51 |

|              |        |        |      |      |
|--------------|--------|--------|------|------|
| Smug1        | 2.45   | 2.46   | 0.60 | 0.64 |
| Glis1        | 0.28   | 0.20   | 0.60 | 0.37 |
| Zdhhc21      | 4.27   | 4.92   | 0.60 | 0.70 |
| Fndc1        | 0.60   | 0.54   | 0.60 | 0.55 |
| Slc9a9       | 0.90   | 1.14   | 0.60 | 0.68 |
| Slc35b3      | 2.36   | 2.14   | 0.60 | 0.63 |
| Slc30a10     | 3.28   | 3.94   | 0.60 | 0.73 |
| Fgf10        | 1.35   | 1.50   | 0.60 | 0.64 |
| Metap1d      | 7.35   | 7.21   | 0.60 | 0.66 |
| Galm         | 0.39   | 0.43   | 0.60 | 0.48 |
| C130021I20Ri | 1.20   | 1.79   | 0.60 | 0.81 |
| Trpc3        | 2.12   | 1.89   | 0.60 | 0.53 |
| Ltbr         | 0.87   | 0.80   | 0.60 | 0.49 |
| Batf3        | 0.17   | 0.18   | 0.60 | 0.30 |
| 2610021K21Ri | 0.17   | 0.09   | 0.60 | 0.32 |
| Gjc1         | 0.88   | 1.05   | 0.60 | 0.62 |
| Cdca7        | 0.49   | 0.43   | 0.60 | 0.59 |
| Gm5796       | 0.91   | 0.96   | 0.60 | 0.80 |
| Syt7         | 8.72   | 9.48   | 0.60 | 0.58 |
| Pdk4         | 1.15   | 1.60   | 0.60 | 0.78 |
| A230077H06R  | 1.20   | 1.43   | 0.60 | 0.76 |
| Zfp131       | 6.00   | 6.21   | 0.60 | 0.70 |
| Mtap2        | 122.47 | 127.47 | 0.60 | 0.62 |
| Asxl3        | 0.95   | 0.90   | 0.60 | 0.63 |
| Tmc3         | 0.42   | 0.34   | 0.60 | 0.59 |
| Naa16        | 1.49   | 1.67   | 0.60 | 0.72 |
| Ddx11        | 0.12   | 0.11   | 0.60 | 0.51 |
| Adra2c       | 2.43   | 2.36   | 0.60 | 0.60 |
| Gucy2g       | 0.10   | 0.10   | 0.60 | 0.31 |
| Nckap5       | 0.53   | 0.44   | 0.60 | 0.50 |
| Zbtb37       | 0.37   | 0.28   | 0.60 | 0.55 |
| Rbms1        | 3.41   | 3.41   | 0.60 | 0.62 |
| 5031439G07R  | 16.33  | 17.02  | 0.60 | 0.62 |
| Ppp2r5a      | 12.70  | 13.05  | 0.60 | 0.65 |
| Usp18        | 0.34   | 0.26   | 0.60 | 0.43 |
| Cyp7b1       | 0.95   | 1.34   | 0.60 | 0.75 |
| Cnih3        | 6.05   | 6.59   | 0.60 | 0.59 |
| Cdh20        | 1.60   | 1.77   | 0.60 | 0.67 |
| Prokr2       | 0.60   | 0.73   | 0.60 | 0.72 |
| Enpp4        | 2.27   | 3.08   | 0.60 | 0.70 |
| Aoc2         | 0.74   | 0.62   | 0.60 | 0.55 |
| Sntb2        | 0.48   | 0.45   | 0.60 | 0.54 |
| Ttc7         | 1.14   | 1.09   | 0.60 | 0.58 |
| Slc35a3      | 3.19   | 3.78   | 0.60 | 0.72 |
| Lypd6b       | 4.19   | 4.19   | 0.60 | 0.65 |
| Alms1        | 0.93   | 0.90   | 0.60 | 0.59 |
| Gca          | 4.52   | 4.47   | 0.59 | 0.56 |
| Mmp2         | 0.45   | 0.41   | 0.59 | 0.63 |
| Ccdc57       | 1.12   | 1.07   | 0.59 | 0.53 |
| Wnt7b        | 2.35   | 2.80   | 0.59 | 0.72 |
| Slc39a1      | 4.08   | 4.44   | 0.59 | 0.59 |
| Abcd4        | 1.29   | 1.15   | 0.59 | 0.58 |
| Efhc1        | 0.69   | 0.67   | 0.59 | 0.63 |
| Pamr1        | 0.67   | 0.73   | 0.59 | 0.55 |
| Gm14169      | 2.12   | 2.03   | 0.59 | 0.68 |
| Gm765        | 0.27   | 0.18   | 0.59 | 0.40 |
| Gm17066      | 9.24   | 10.03  | 0.59 | 0.73 |
| Glis2        | 2.15   | 2.10   | 0.59 | 0.57 |
| Scrt1        | 10.65  | 10.35  | 0.59 | 0.60 |
| Rin1         | 1.13   | 1.06   | 0.59 | 0.49 |
| Wnk1         | 13.37  | 13.89  | 0.59 | 0.62 |
| 4930534B04R  | 0.43   | 0.55   | 0.59 | 0.73 |
| Smc5         | 5.13   | 5.50   | 0.59 | 0.71 |
| 1700003M02R  | 0.89   | 1.00   | 0.59 | 0.80 |
| Vldlr        | 4.15   | 4.90   | 0.59 | 0.70 |

|              |       |       |      |      |
|--------------|-------|-------|------|------|
| 1700008J07Ri | 1.01  | 1.10  | 0.59 | 0.71 |
| Atxn1        | 3.85  | 4.09  | 0.59 | 0.64 |
| Rasl11a      | 1.94  | 1.58  | 0.59 | 0.47 |
| 4933439F18Ri | 8.57  | 9.04  | 0.59 | 0.59 |
| Lap3         | 15.31 | 14.48 | 0.59 | 0.59 |
| H2-Q4        | 2.00  | 2.32  | 0.59 | 0.73 |
| Kif16b       | 1.51  | 1.66  | 0.59 | 0.69 |
| Nrg2         | 1.10  | 1.03  | 0.59 | 0.52 |
| Unc13d       | 0.14  | 0.10  | 0.59 | 0.45 |
| Gucy2e       | 0.36  | 0.40  | 0.59 | 0.65 |
| Ttll4        | 0.86  | 0.83  | 0.59 | 0.54 |
| Tradd        | 2.21  | 1.92  | 0.59 | 0.51 |
| Spna2        | 35.41 | 34.74 | 0.59 | 0.56 |
| Gsta4        | 43.56 | 40.96 | 0.59 | 0.56 |
| Fmr1         | 8.53  | 9.07  | 0.59 | 0.65 |
| Taf13        | 17.98 | 18.25 | 0.59 | 0.70 |
| Pctp         | 0.64  | 0.63  | 0.59 | 0.71 |
| Lix1         | 5.33  | 6.31  | 0.59 | 0.67 |
| Slc26a6      | 0.86  | 0.90  | 0.59 | 0.62 |
| Fmn12        | 4.16  | 4.31  | 0.59 | 0.64 |
| Lingo4       | 0.37  | 0.43  | 0.59 | 0.84 |
| Akap9        | 6.04  | 6.26  | 0.59 | 0.63 |
| Zfp932       | 25.50 | 26.76 | 0.59 | 0.70 |
| Ctage5       | 5.68  | 6.71  | 0.59 | 0.68 |
| Lrrc10b      | 2.74  | 2.20  | 0.59 | 0.62 |
| Helb         | 0.52  | 0.50  | 0.59 | 0.60 |
| Hbp1         | 9.34  | 9.66  | 0.59 | 0.62 |
| Skap2        | 4.94  | 4.45  | 0.59 | 0.52 |
| Sema6d       | 4.90  | 5.54  | 0.59 | 0.63 |
| Med12        | 1.22  | 1.26  | 0.59 | 0.63 |
| Tmem164      | 2.85  | 2.85  | 0.59 | 0.57 |
| Cntn3        | 1.68  | 1.84  | 0.59 | 0.66 |
| Pdgfb        | 1.26  | 1.45  | 0.59 | 0.62 |
| Map4k4       | 9.30  | 9.14  | 0.59 | 0.60 |
| Itsn2        | 3.75  | 3.84  | 0.59 | 0.61 |
| Kcnd1        | 1.24  | 1.14  | 0.59 | 0.51 |
| BC030307     | 0.53  | 0.49  | 0.59 | 0.61 |
| Srpk3        | 0.41  | 0.38  | 0.59 | 0.50 |
| Maob         | 11.81 | 12.78 | 0.59 | 0.62 |
| Fut10        | 0.47  | 0.78  | 0.59 | 0.67 |
| Cep152       | 0.45  | 0.40  | 0.59 | 0.52 |
| Eya2         | 0.96  | 0.77  | 0.59 | 0.46 |
| Zkscan3      | 5.27  | 5.74  | 0.59 | 0.63 |
| Arhgap11a    | 0.21  | 0.23  | 0.58 | 0.67 |
| Esyt2        | 3.25  | 4.11  | 0.58 | 0.75 |
| Limch1       | 7.40  | 7.54  | 0.58 | 0.62 |
| Dnahc9       | 0.28  | 0.25  | 0.58 | 0.54 |
| 4933426M11Ri | 2.35  | 2.93  | 0.58 | 0.69 |
| Sec24a       | 2.55  | 2.56  | 0.58 | 0.63 |
| Agmat        | 0.18  | 0.14  | 0.58 | 0.41 |
| Trpm7        | 4.28  | 4.91  | 0.58 | 0.69 |
| Thsd4        | 0.30  | 0.32  | 0.58 | 0.64 |
| Gpr157       | 0.56  | 0.61  | 0.58 | 0.67 |
| Zfp52        | 1.52  | 1.96  | 0.58 | 0.82 |
| Ccnj         | 1.67  | 1.82  | 0.58 | 0.64 |
| Renbp        | 1.72  | 2.20  | 0.58 | 0.64 |
| Il17rd       | 0.21  | 0.26  | 0.58 | 0.74 |
| 9430008C03Ri | 2.12  | 2.18  | 0.58 | 0.62 |
| Fzd4         | 0.30  | 0.35  | 0.58 | 0.69 |
| Vps37b       | 3.33  | 3.11  | 0.58 | 0.53 |
| Ctnnd1       | 6.09  | 6.25  | 0.58 | 0.63 |
| Zfp238       | 12.14 | 12.28 | 0.58 | 0.56 |
| Olfir856-ps1 | 8.07  | 8.78  | 0.58 | 0.67 |
| Cntn2        | 5.08  | 6.10  | 0.58 | 0.61 |
| Acan         | 0.10  | 0.12  | 0.58 | 0.60 |

|             |       |       |      |      |
|-------------|-------|-------|------|------|
| Tor3a       | 0.69  | 0.75  | 0.58 | 0.66 |
| Kctd11      | 0.63  | 0.60  | 0.58 | 0.52 |
| Dnmbp       | 0.82  | 0.79  | 0.58 | 0.56 |
| Cttnbp2nl   | 3.78  | 4.12  | 0.58 | 0.61 |
| Tbr1        | 2.30  | 2.06  | 0.58 | 0.45 |
| Arv1        | 2.24  | 2.45  | 0.58 | 0.74 |
| Npc1        | 3.39  | 3.95  | 0.58 | 0.59 |
| Itpkb       | 4.83  | 4.70  | 0.58 | 0.59 |
| Cflar       | 1.75  | 1.88  | 0.58 | 0.65 |
| Ticam2      | 0.06  | 0.02  | 0.58 | 0.12 |
| Asprv1      | 0.49  | 0.54  | 0.58 | 0.67 |
| AU023762    | 0.39  | 0.55  | 0.58 | 0.66 |
| Hsbp111     | 0.83  | 0.85  | 0.58 | 0.78 |
| Usp53       | 1.65  | 1.64  | 0.58 | 0.57 |
| Smc2        | 1.38  | 1.45  | 0.58 | 0.64 |
| Ccdc46      | 1.64  | 1.79  | 0.58 | 0.80 |
| Snx20       | 1.05  | 1.16  | 0.58 | 0.77 |
| Eno4        | 1.51  | 1.52  | 0.58 | 0.72 |
| Tpp1        | 4.61  | 5.23  | 0.58 | 0.63 |
| Epor        | 0.88  | 0.90  | 0.58 | 0.65 |
| Krba1       | 3.23  | 3.31  | 0.58 | 0.61 |
| Hells       | 0.65  | 0.65  | 0.58 | 0.66 |
| Sun1        | 7.08  | 8.21  | 0.58 | 0.68 |
| Mlxip       | 2.42  | 2.83  | 0.58 | 0.66 |
| Aldh1a7     | 0.20  | 0.30  | 0.58 | 0.56 |
| Lrrc51      | 4.49  | 4.69  | 0.58 | 0.67 |
| Pan2        | 1.30  | 1.37  | 0.58 | 0.57 |
| Pdlim3      | 0.67  | 0.81  | 0.58 | 0.89 |
| Pnn         | 12.92 | 15.54 | 0.58 | 0.74 |
| Gtf2a1l     | 0.39  | 0.20  | 0.58 | 0.30 |
| Pecam1      | 0.31  | 0.59  | 0.58 | 1.11 |
| Prdx6       | 50.20 | 51.23 | 0.58 | 0.56 |
| 2810474O19R | 1.16  | 1.31  | 0.58 | 0.67 |
| Erf         | 2.50  | 2.28  | 0.58 | 0.53 |
| Pkdcc       | 1.92  | 1.94  | 0.58 | 0.63 |
| Rimk1a      | 6.55  | 6.76  | 0.58 | 0.62 |
| H2-DMb1     | 0.34  | 0.29  | 0.58 | 0.47 |
| Tgfb1       | 0.50  | 0.49  | 0.58 | 0.51 |
| Pwwp2a      | 4.72  | 4.90  | 0.58 | 0.63 |
| Zfp169      | 1.39  | 1.35  | 0.58 | 0.64 |
| Arhgef37    | 0.17  | 0.12  | 0.58 | 0.36 |
| Rnf38       | 9.61  | 10.02 | 0.58 | 0.64 |
| Syng2       | 1.76  | 1.83  | 0.58 | 0.57 |
| Pla2g3      | 0.19  | 0.22  | 0.58 | 0.52 |
| Zfp276      | 1.72  | 1.76  | 0.58 | 0.57 |
| Kcns3       | 1.01  | 1.08  | 0.58 | 0.62 |
| Vps13b      | 2.71  | 2.92  | 0.57 | 0.62 |
| Dcxr        | 3.79  | 3.88  | 0.57 | 0.60 |
| Sfrs18      | 15.55 | 14.14 | 0.57 | 0.61 |
| Axin2       | 3.50  | 3.36  | 0.57 | 0.57 |
| 2810008D09R | 7.32  | 6.88  | 0.57 | 0.66 |
| Wnt5a       | 1.53  | 2.18  | 0.57 | 0.77 |
| Tyro3       | 4.43  | 4.96  | 0.57 | 0.56 |
| Slc24a2     | 7.43  | 9.49  | 0.57 | 0.65 |
| Tmem51      | 0.56  | 0.55  | 0.57 | 0.49 |
| Nkain1      | 19.76 | 20.98 | 0.57 | 0.57 |
| Pxmp4       | 3.87  | 4.00  | 0.57 | 0.57 |
| 9030025P20R | 0.99  | 1.01  | 0.57 | 0.69 |
| Kcnn3       | 1.47  | 1.74  | 0.57 | 0.70 |
| Tmod1       | 3.17  | 2.89  | 0.57 | 0.58 |
| Lamp2       | 6.11  | 6.77  | 0.57 | 0.63 |
| Slc38a2     | 11.14 | 12.36 | 0.57 | 0.64 |
| Ggcx        | 1.68  | 1.67  | 0.57 | 0.63 |
| Slc31a2     | 3.24  | 3.39  | 0.57 | 0.58 |
| Ptpn12      | 8.76  | 9.19  | 0.57 | 0.63 |

|             |        |        |      |      |
|-------------|--------|--------|------|------|
| Zcchc6      | 3.89   | 4.19   | 0.57 | 0.62 |
| Gltscr1     | 1.65   | 1.55   | 0.57 | 0.49 |
| Serpina1a   | 0.08   | 0.11   | 0.57 | 0.40 |
| 1810055G02R | 2.41   | 2.25   | 0.57 | 0.56 |
| Phka1       | 3.06   | 3.13   | 0.57 | 0.59 |
| Cst3        | 289.14 | 296.18 | 0.57 | 0.58 |
| A730017L22R | 2.85   | 3.01   | 0.57 | 0.65 |
| Spag8       | 1.18   | 1.11   | 0.57 | 0.54 |
| Mmp16       | 1.23   | 1.28   | 0.57 | 0.71 |
| 5830418K08R | 1.37   | 1.48   | 0.57 | 0.64 |
| Pik3r5      | 0.27   | 0.25   | 0.57 | 0.46 |
| Ankrd28     | 5.26   | 5.16   | 0.57 | 0.58 |
| Fam169b     | 0.15   | 0.13   | 0.57 | 0.52 |
| Lims1       | 6.58   | 6.83   | 0.57 | 0.62 |
| Caprin2     | 2.18   | 2.56   | 0.57 | 0.66 |
| Prkab1      | 3.60   | 3.97   | 0.57 | 0.69 |
| Gins1       | 1.00   | 1.41   | 0.57 | 1.29 |
| Gfpt2       | 1.14   | 1.13   | 0.57 | 0.64 |
| Ptpla       | 5.04   | 5.30   | 0.57 | 0.54 |
| Tfrc        | 7.74   | 8.84   | 0.57 | 0.73 |
| Prr11       | 0.34   | 0.33   | 0.57 | 0.56 |
| BC006779    | 0.10   | 0.12   | 0.57 | 0.70 |
| Eif4ebp1    | 0.79   | 0.95   | 0.57 | 0.57 |
| 1700020L24R | 0.51   | 0.52   | 0.57 | 0.49 |
| Tax1bp3     | 4.11   | 3.83   | 0.57 | 0.51 |
| 6030422M02R | 1.12   | 1.13   | 0.57 | 0.60 |
| C130080G10R | 0.36   | 0.33   | 0.57 | 0.53 |
| Gmeb1       | 2.11   | 2.01   | 0.57 | 0.58 |
| Apold1      | 0.40   | 0.58   | 0.57 | 1.17 |
| Dazl        | 0.41   | 0.39   | 0.57 | 0.60 |
| Mtmr11      | 1.55   | 1.57   | 0.57 | 0.63 |
| Xiap        | 20.42  | 21.57  | 0.57 | 0.63 |
| Prdm9       | 0.43   | 0.44   | 0.57 | 0.65 |
| H6pd        | 0.51   | 0.59   | 0.57 | 0.68 |
| Slitrk2     | 1.14   | 1.38   | 0.57 | 0.75 |
| Arap1       | 2.29   | 2.21   | 0.57 | 0.55 |
| Ddit4       | 13.28  | 12.46  | 0.57 | 0.54 |
| Ifi2712a    | 2.78   | 2.81   | 0.57 | 0.45 |
| Chek1       | 0.43   | 0.51   | 0.57 | 0.79 |
| Gm6313      | 0.30   | 0.42   | 0.57 | 0.79 |
| Rarg        | 1.56   | 1.57   | 0.57 | 0.55 |
| Rab38       | 0.30   | 0.34   | 0.57 | 0.60 |
| Usp24       | 6.02   | 6.26   | 0.57 | 0.64 |
| Hpgd        | 1.89   | 1.89   | 0.57 | 0.62 |
| S1pr2       | 0.18   | 0.21   | 0.57 | 0.49 |
| Nrap        | 0.12   | 0.11   | 0.57 | 0.60 |
| Ano6        | 2.16   | 2.42   | 0.57 | 0.64 |
| Olfm4       | 0.42   | 0.34   | 0.57 | 0.51 |
| Mphosph9    | 2.02   | 1.99   | 0.57 | 0.56 |
| Cass4       | 0.14   | 0.13   | 0.57 | 0.54 |
| Tnfrsf10b   | 0.59   | 0.61   | 0.57 | 0.50 |
| D630003M21R | 0.79   | 0.89   | 0.56 | 0.54 |
| Arhgap42    | 1.08   | 1.12   | 0.56 | 0.58 |
| Gpr15       | 0.59   | 0.77   | 0.56 | 0.54 |
| Mansc1      | 0.21   | 0.25   | 0.56 | 0.55 |
| Rnls        | 1.61   | 1.73   | 0.56 | 0.69 |
| Fam78a      | 0.23   | 0.25   | 0.56 | 0.59 |
| Fut9        | 5.29   | 6.22   | 0.56 | 0.69 |
| Tcirg1      | 1.20   | 1.59   | 0.56 | 0.73 |
| Cables1     | 5.96   | 5.75   | 0.56 | 0.51 |
| Nlrp1a      | 0.35   | 0.41   | 0.56 | 0.69 |
| Ccdc88b     | 0.43   | 0.46   | 0.56 | 0.57 |
| Ccdc135     | 1.11   | 0.90   | 0.56 | 0.64 |
| Rtkn        | 9.03   | 8.25   | 0.56 | 0.50 |
| Mpst        | 11.65  | 10.22  | 0.56 | 0.51 |



|              |        |        |      |      |
|--------------|--------|--------|------|------|
| Rnf135       | 1.31   | 1.20   | 0.56 | 0.45 |
| Ddah2        | 4.65   | 4.81   | 0.56 | 0.50 |
| Itga8        | 0.13   | 0.11   | 0.56 | 0.38 |
| Tshz2        | 6.71   | 6.49   | 0.56 | 0.53 |
| Gm8234       | 1.87   | 2.15   | 0.56 | 0.80 |
| Ptplb        | 2.47   | 3.14   | 0.56 | 0.66 |
| Odf2l        | 3.65   | 3.87   | 0.56 | 0.69 |
| Asrgl1       | 32.62  | 32.84  | 0.56 | 0.60 |
| 4933427D14R  | 5.90   | 5.89   | 0.56 | 0.56 |
| Fam101a      | 0.73   | 0.76   | 0.56 | 0.62 |
| Herc1        | 10.28  | 10.20  | 0.56 | 0.57 |
| Ctf1         | 1.09   | 1.31   | 0.56 | 0.65 |
| Krcc1        | 5.92   | 5.70   | 0.56 | 0.57 |
| Huwe1        | 15.84  | 16.21  | 0.56 | 0.59 |
| Dennd1b      | 1.32   | 1.37   | 0.56 | 0.62 |
| Cntnap5c     | 0.48   | 0.52   | 0.56 | 0.81 |
| Opn4         | 0.11   | 0.05   | 0.56 | 0.30 |
| Esrrg        | 5.39   | 5.63   | 0.56 | 0.64 |
| Zdhhc23      | 0.74   | 0.69   | 0.56 | 0.52 |
| Vipr2        | 0.61   | 0.73   | 0.56 | 0.67 |
| A430105I19Ri | 0.85   | 0.78   | 0.56 | 0.49 |
| Trpm3        | 2.21   | 2.38   | 0.56 | 0.54 |
| Celsr3       | 2.41   | 2.77   | 0.56 | 0.63 |
| 4833417C18Ri | 0.36   | 0.51   | 0.56 | 0.61 |
| Cxcr7        | 0.65   | 0.91   | 0.56 | 0.78 |
| Icam1        | 0.17   | 0.13   | 0.56 | 0.45 |
| Glit25d1     | 5.77   | 6.52   | 0.56 | 0.62 |
| Zdhhc9       | 3.86   | 4.63   | 0.56 | 0.60 |
| Adamts1      | 0.50   | 0.47   | 0.56 | 0.53 |
| Sbf2         | 3.97   | 4.18   | 0.56 | 0.62 |
| Myo10        | 2.38   | 2.14   | 0.56 | 0.57 |
| Cttnbp2      | 5.10   | 5.31   | 0.56 | 0.57 |
| Sox1         | 8.47   | 7.52   | 0.56 | 0.56 |
| Ddn          | 12.19  | 12.07  | 0.56 | 0.45 |
| Acaa1b       | 0.23   | 0.25   | 0.56 | 0.56 |
| Fat1         | 1.34   | 1.42   | 0.56 | 0.60 |
| Tmem218      | 5.51   | 5.82   | 0.56 | 0.60 |
| Pde5a        | 0.29   | 0.32   | 0.56 | 0.55 |
| 1700088E04Ri | 9.49   | 9.35   | 0.56 | 0.58 |
| Sestd1       | 3.59   | 3.62   | 0.56 | 0.57 |
| Mtf2         | 9.43   | 9.81   | 0.56 | 0.65 |
| Kctd15       | 2.98   | 2.94   | 0.56 | 0.57 |
| Lekr1        | 1.34   | 1.11   | 0.56 | 0.52 |
| Gria3        | 8.04   | 8.87   | 0.56 | 0.61 |
| Sec14l2      | 5.38   | 5.59   | 0.56 | 0.54 |
| Usp49        | 2.35   | 2.39   | 0.56 | 0.60 |
| Zfp831       | 0.49   | 0.50   | 0.56 | 0.54 |
| Ppargc1b     | 0.80   | 0.81   | 0.56 | 0.53 |
| Nufip2       | 6.16   | 6.62   | 0.56 | 0.66 |
| Hsd3b7       | 2.07   | 2.18   | 0.56 | 0.61 |
| Figl2        | 0.54   | 0.55   | 0.56 | 0.58 |
| Apc          | 7.15   | 7.75   | 0.55 | 0.61 |
| Ect2         | 0.12   | 0.06   | 0.55 | 0.40 |
| Thbs3        | 1.03   | 1.09   | 0.55 | 0.74 |
| Tmem232      | 0.26   | 0.25   | 0.55 | 0.56 |
| 2510049J12Ri | 0.42   | 0.49   | 0.55 | 0.62 |
| Neu2         | 0.48   | 0.45   | 0.55 | 0.55 |
| Trim39       | 7.45   | 7.44   | 0.55 | 0.58 |
| Slc10a4      | 1.24   | 1.10   | 0.55 | 0.55 |
| C1qf2        | 4.01   | 3.99   | 0.55 | 0.54 |
| Kcnj2        | 1.05   | 1.23   | 0.55 | 0.62 |
| Grb14        | 11.68  | 11.01  | 0.55 | 0.51 |
| Abcb1a       | 0.21   | 0.42   | 0.55 | 1.54 |
| Aldoc        | 270.03 | 266.09 | 0.55 | 0.54 |
| C330021F23Ri | 0.37   | 0.52   | 0.55 | 1.06 |

|              |       |       |      |      |
|--------------|-------|-------|------|------|
| A630075F10R  | 0.40  | 0.45  | 0.55 | 0.53 |
| Nbeal2       | 1.00  | 1.00  | 0.55 | 0.58 |
| Abca2        | 7.86  | 8.61  | 0.55 | 0.54 |
| Mogat1       | 0.81  | 0.89  | 0.55 | 0.65 |
| Klf15        | 5.83  | 5.60  | 0.55 | 0.52 |
| Trim68       | 0.80  | 0.85  | 0.55 | 0.56 |
| Atxn3        | 4.38  | 4.84  | 0.55 | 0.65 |
| Gstt1        | 11.77 | 10.69 | 0.55 | 0.56 |
| Myl2         | 0.27  | 0.12  | 0.55 | 0.19 |
| Prss30       | 0.28  | 0.24  | 0.55 | 0.39 |
| Ppard        | 2.89  | 2.88  | 0.55 | 0.54 |
| C2cd2        | 1.20  | 1.40  | 0.55 | 0.62 |
| Dennd3       | 0.53  | 0.52  | 0.55 | 0.61 |
| Pax6         | 2.14  | 2.03  | 0.55 | 0.51 |
| Slc25a23     | 52.65 | 52.35 | 0.55 | 0.56 |
| Mdc1         | 1.18  | 1.19  | 0.55 | 0.54 |
| Tex9         | 2.32  | 2.32  | 0.55 | 0.56 |
| Zfp445       | 18.88 | 19.60 | 0.55 | 0.61 |
| Abcc4        | 0.30  | 0.33  | 0.55 | 0.53 |
| Zfp26        | 1.37  | 1.56  | 0.55 | 0.66 |
| Slc6a6       | 5.65  | 6.70  | 0.55 | 0.66 |
| Gm5577       | 0.84  | 0.75  | 0.55 | 0.52 |
| Nfic         | 6.83  | 6.98  | 0.55 | 0.57 |
| Foxn2        | 1.92  | 2.05  | 0.55 | 0.58 |
| Pigl         | 2.00  | 2.10  | 0.55 | 0.53 |
| Gm5595       | 1.34  | 1.56  | 0.55 | 0.76 |
| 1700026D08R  | 2.96  | 3.10  | 0.55 | 0.65 |
| Tex15        | 0.08  | 0.07  | 0.55 | 0.47 |
| 6330503K22R  | 9.75  | 10.43 | 0.55 | 0.60 |
| Zfp595       | 0.39  | 0.40  | 0.55 | 0.54 |
| Scn1a        | 6.38  | 7.14  | 0.55 | 0.62 |
| Sec63        | 4.90  | 5.43  | 0.55 | 0.60 |
| Pappa        | 0.12  | 0.13  | 0.55 | 0.59 |
| Slitrk6      | 1.03  | 1.06  | 0.55 | 0.54 |
| Gcnt1        | 0.17  | 0.22  | 0.55 | 0.41 |
| Chrm4        | 0.66  | 0.81  | 0.55 | 0.68 |
| Gm5607       | 2.76  | 2.61  | 0.55 | 0.56 |
| 1700029J07Ri | 0.71  | 0.68  | 0.55 | 0.59 |
| Rnf13        | 15.09 | 17.66 | 0.55 | 0.61 |
| Cacna1g      | 4.78  | 5.10  | 0.55 | 0.55 |
| Dhx58        | 0.32  | 0.30  | 0.55 | 0.63 |
| Micall1      | 5.44  | 5.58  | 0.55 | 0.54 |
| Kctd9        | 7.04  | 7.42  | 0.55 | 0.59 |
| A830093I24Ri | 0.76  | 0.97  | 0.54 | 0.62 |
| Zbtb34       | 1.14  | 1.18  | 0.54 | 0.54 |
| Slx1b        | 3.15  | 3.03  | 0.54 | 0.54 |
| Ky           | 0.41  | 0.38  | 0.54 | 0.56 |
| Tyk2         | 1.07  | 0.99  | 0.54 | 0.53 |
| Gdpd2        | 1.81  | 1.78  | 0.54 | 0.58 |
| Lphn2        | 4.89  | 5.25  | 0.54 | 0.64 |
| Agbl2        | 0.25  | 0.29  | 0.54 | 0.58 |
| Slc27a1      | 5.47  | 5.42  | 0.54 | 0.57 |
| Purg         | 5.53  | 6.01  | 0.54 | 0.59 |
| Spg11        | 2.10  | 2.28  | 0.54 | 0.58 |
| Igf1r        | 1.45  | 1.67  | 0.54 | 0.66 |
| Ank3         | 10.31 | 10.41 | 0.54 | 0.60 |
| Prdm12       | 1.55  | 1.50  | 0.54 | 0.55 |
| Golim4       | 1.00  | 1.12  | 0.54 | 0.60 |
| Egf          | 0.26  | 0.24  | 0.54 | 0.62 |
| Hpdl         | 0.35  | 0.28  | 0.54 | 0.45 |
| Trhr2        | 0.62  | 0.64  | 0.54 | 0.53 |
| 4930528D03R  | 0.13  | 0.09  | 0.54 | 0.36 |
| St6gal2      | 0.36  | 0.48  | 0.54 | 0.62 |
| Pppde2       | 27.93 | 28.55 | 0.54 | 0.58 |
| Prkx         | 1.78  | 2.10  | 0.54 | 0.65 |

|             |       |       |      |      |
|-------------|-------|-------|------|------|
| Sema4b      | 1.48  | 1.53  | 0.54 | 0.58 |
| Fam55d      | 1.05  | 1.28  | 0.54 | 0.61 |
| Adam19      | 0.91  | 1.08  | 0.54 | 0.60 |
| Helq        | 1.92  | 1.73  | 0.54 | 0.55 |
| Slc20a1     | 15.04 | 17.17 | 0.54 | 0.65 |
| Gm973       | 0.93  | 0.94  | 0.54 | 0.54 |
| Gm5458      | 0.44  | 0.37  | 0.54 | 0.56 |
| Nr4a2       | 2.52  | 3.33  | 0.54 | 0.74 |
| Gm20362     | 0.43  | 0.56  | 0.54 | 0.77 |
| Galnt7      | 1.75  | 1.98  | 0.54 | 0.63 |
| Hr          | 2.01  | 2.05  | 0.54 | 0.56 |
| Tagln2      | 5.13  | 3.86  | 0.54 | 0.43 |
| Fmn1        | 0.47  | 0.44  | 0.54 | 0.46 |
| Ddit3       | 21.96 | 21.69 | 0.54 | 0.52 |
| Kirrel      | 0.70  | 0.73  | 0.54 | 0.53 |
| Slc25a35    | 0.79  | 0.79  | 0.54 | 0.48 |
| Cdc7        | 3.58  | 3.41  | 0.54 | 0.60 |
| Qtrtd1      | 3.22  | 3.77  | 0.54 | 0.71 |
| Zswim6      | 1.92  | 1.82  | 0.54 | 0.54 |
| Atm         | 1.41  | 1.37  | 0.54 | 0.55 |
| St5         | 2.44  | 2.48  | 0.54 | 0.49 |
| Zfp101      | 2.20  | 2.53  | 0.54 | 0.67 |
| Prex1       | 6.35  | 6.10  | 0.54 | 0.56 |
| Mkx         | 1.71  | 1.63  | 0.54 | 0.56 |
| Trib1       | 1.13  | 1.23  | 0.54 | 0.62 |
| Hjrp        | 0.67  | 0.84  | 0.54 | 0.62 |
| 4931406C07R | 5.41  | 5.69  | 0.54 | 0.55 |
| Hexb        | 8.32  | 10.50 | 0.54 | 0.65 |
| Tmem38b     | 1.56  | 1.86  | 0.54 | 0.72 |
| Gm10516     | 1.66  | 1.63  | 0.54 | 0.52 |
| Chst5       | 0.28  | 0.29  | 0.54 | 0.52 |
| Gm17821     | 2.52  | 2.71  | 0.54 | 0.64 |
| Rnf144a     | 3.31  | 3.38  | 0.54 | 0.57 |
| Mterf       | 1.01  | 0.95  | 0.54 | 0.63 |
| Gdpd5       | 1.26  | 1.49  | 0.54 | 0.61 |
| Zfp473      | 0.18  | 0.23  | 0.54 | 0.72 |
| lqcg        | 5.42  | 5.67  | 0.54 | 0.59 |
| Pdgfc       | 0.91  | 1.16  | 0.54 | 0.64 |
| Ctdspl      | 3.24  | 3.05  | 0.54 | 0.49 |
| Ano4        | 3.01  | 3.27  | 0.54 | 0.61 |
| Ndrp1       | 32.93 | 33.34 | 0.54 | 0.55 |
| Rhbdf1      | 0.66  | 0.65  | 0.54 | 0.47 |
| Fah         | 7.44  | 7.41  | 0.54 | 0.49 |
| Fam83h      | 0.55  | 0.45  | 0.54 | 0.58 |
| Lipg        | 0.09  | 0.10  | 0.53 | 0.50 |
| Nadsyn1     | 1.16  | 1.25  | 0.53 | 0.64 |
| Scd2        | 69.88 | 81.16 | 0.53 | 0.59 |
| Zfp953      | 0.19  | 0.18  | 0.53 | 0.47 |
| Tatdn3      | 7.09  | 7.35  | 0.53 | 0.62 |
| Abcc10      | 0.81  | 0.97  | 0.53 | 0.64 |
| Tmod3       | 4.23  | 4.78  | 0.53 | 0.60 |
| A330021E22R | 2.47  | 2.51  | 0.53 | 0.61 |
| Lrdd        | 0.24  | 0.28  | 0.53 | 0.67 |
| Sytl4       | 6.64  | 7.14  | 0.53 | 0.66 |
| Cep350      | 3.42  | 3.55  | 0.53 | 0.55 |
| Cat         | 13.17 | 12.03 | 0.53 | 0.51 |
| Fndc5       | 12.76 | 13.59 | 0.53 | 0.58 |
| Ccdc45      | 1.52  | 1.53  | 0.53 | 0.55 |
| C1galt1     | 1.48  | 1.80  | 0.53 | 0.74 |
| Ap1m2       | 0.08  | 0.07  | 0.53 | 0.29 |
| Col8a1      | 0.26  | 0.31  | 0.53 | 0.60 |
| Anks6       | 1.27  | 1.20  | 0.53 | 0.54 |
| Mfn1        | 12.29 | 13.27 | 0.53 | 0.59 |
| Col18a1     | 0.21  | 0.32  | 0.53 | 0.66 |
| 2310010M20R | 0.69  | 0.46  | 0.53 | 0.42 |

|               |       |       |      |      |
|---------------|-------|-------|------|------|
| Snhg5         | 5.64  | 5.62  | 0.53 | 0.51 |
| Bace2         | 0.32  | 0.38  | 0.53 | 0.63 |
| Zbed4         | 1.15  | 1.18  | 0.53 | 0.55 |
| Fam111a       | 0.36  | 0.41  | 0.53 | 0.62 |
| Antxr2        | 0.12  | 0.10  | 0.53 | 0.37 |
| Vps13d        | 4.34  | 4.40  | 0.53 | 0.55 |
| Igfbp6        | 0.70  | 0.56  | 0.53 | 0.27 |
| Ccdc39        | 3.36  | 3.30  | 0.53 | 0.61 |
| Tln1          | 2.01  | 2.13  | 0.53 | 0.58 |
| Man2a1        | 0.85  | 0.97  | 0.53 | 0.65 |
| Sft2d3        | 1.88  | 1.64  | 0.53 | 0.50 |
| Golga7        | 39.54 | 39.70 | 0.53 | 0.54 |
| Phip          | 4.28  | 4.87  | 0.53 | 0.63 |
| Xdh           | 0.11  | 0.14  | 0.53 | 0.55 |
| Esyt1         | 0.58  | 0.65  | 0.53 | 0.58 |
| Figl1         | 0.22  | 0.26  | 0.53 | 0.84 |
| Rdh9          | 0.14  | 0.14  | 0.53 | 0.55 |
| Tspan12       | 3.24  | 3.80  | 0.53 | 0.57 |
| Sp6           | 0.08  | 0.07  | 0.53 | 0.41 |
| Atp10a        | 0.64  | 0.74  | 0.53 | 0.59 |
| Sncaip        | 1.18  | 1.23  | 0.53 | 0.60 |
| Clmn          | 3.53  | 3.56  | 0.53 | 0.52 |
| Slc44a2       | 2.53  | 2.88  | 0.53 | 0.60 |
| Chd9          | 4.26  | 4.37  | 0.53 | 0.55 |
| Cd109         | 0.08  | 0.07  | 0.53 | 0.42 |
| Dock10        | 3.72  | 3.99  | 0.53 | 0.60 |
| Unc13b        | 1.68  | 1.69  | 0.53 | 0.53 |
| Map4k5        | 5.70  | 6.26  | 0.53 | 0.58 |
| Ncrna00085    | 1.88  | 1.74  | 0.53 | 0.46 |
| Ramp3         | 4.32  | 3.79  | 0.53 | 0.47 |
| Wfdc1         | 0.49  | 0.68  | 0.53 | 0.58 |
| Zmym6         | 7.54  | 7.64  | 0.53 | 0.62 |
| Egfem1        | 1.54  | 1.87  | 0.53 | 0.63 |
| Ctns          | 1.81  | 2.12  | 0.53 | 0.64 |
| Fcer2a        | 0.41  | 0.30  | 0.53 | 0.38 |
| Marveld1      | 1.33  | 1.27  | 0.53 | 0.50 |
| Zfp804b       | 0.36  | 0.34  | 0.53 | 0.52 |
| Mical1        | 0.99  | 0.82  | 0.53 | 0.46 |
| Plekha5       | 3.67  | 3.99  | 0.53 | 0.60 |
| Gpr155        | 2.89  | 3.45  | 0.53 | 0.60 |
| Bmp2k         | 1.67  | 1.75  | 0.53 | 0.58 |
| Psme4         | 4.48  | 4.66  | 0.53 | 0.58 |
| Trim36        | 2.03  | 1.96  | 0.53 | 0.52 |
| 1190005I06Ril | 5.79  | 5.79  | 0.53 | 0.53 |
| Miip          | 1.21  | 1.22  | 0.53 | 0.56 |
| Lactb2        | 4.24  | 4.37  | 0.53 | 0.59 |
| Rufy2         | 4.17  | 4.45  | 0.53 | 0.59 |
| Fam189a2      | 2.09  | 2.09  | 0.52 | 0.51 |
| Synpo2        | 0.72  | 0.80  | 0.52 | 0.58 |
| Lrch3         | 4.26  | 4.28  | 0.52 | 0.55 |
| Wdr62         | 0.13  | 0.15  | 0.52 | 0.65 |
| Lgr4          | 1.81  | 2.09  | 0.52 | 0.66 |
| Gm4952        | 0.17  | 0.13  | 0.52 | 0.43 |
| Spin4         | 0.18  | 0.25  | 0.52 | 0.90 |
| Grk1          | 0.11  | 0.11  | 0.52 | 0.58 |
| Dmrta2        | 0.73  | 0.52  | 0.52 | 0.44 |
| Gpr126        | 0.10  | 0.09  | 0.52 | 0.41 |
| AY512931      | 0.28  | 0.29  | 0.52 | 0.51 |
| Pou3f3        | 7.86  | 7.68  | 0.52 | 0.50 |
| Qser1         | 1.46  | 1.48  | 0.52 | 0.55 |
| Mia1          | 1.42  | 1.27  | 0.52 | 0.61 |
| Mysm1         | 2.61  | 2.65  | 0.52 | 0.61 |
| Dram1         | 0.34  | 0.28  | 0.52 | 0.49 |
| A630055G03R   | 0.44  | 0.46  | 0.52 | 0.59 |
| 4930402H24R   | 8.13  | 8.44  | 0.52 | 0.57 |

|              |        |        |      |      |
|--------------|--------|--------|------|------|
| Scn9a        | 2.44   | 2.93   | 0.52 | 0.71 |
| Gm15645      | 3.18   | 3.48   | 0.52 | 0.59 |
| Mfsd8        | 1.30   | 1.52   | 0.52 | 0.63 |
| Tacr3        | 2.09   | 2.19   | 0.52 | 0.52 |
| Colec12      | 1.58   | 1.73   | 0.52 | 0.63 |
| Szt2         | 1.63   | 1.58   | 0.52 | 0.48 |
| Mfsd7b       | 2.99   | 3.62   | 0.52 | 0.63 |
| Slc17a8      | 0.33   | 0.39   | 0.52 | 0.61 |
| D930020B18R  | 0.23   | 0.19   | 0.52 | 0.43 |
| Kif7         | 0.41   | 0.50   | 0.52 | 0.71 |
| Ak3          | 17.50  | 18.28  | 0.52 | 0.54 |
| Abcd2        | 2.16   | 2.34   | 0.52 | 0.65 |
| Hic1         | 0.36   | 0.40   | 0.52 | 0.61 |
| Crabp1       | 11.61  | 14.67  | 0.52 | 0.65 |
| Dbndd2       | 25.24  | 25.73  | 0.52 | 0.53 |
| Ano5         | 0.52   | 0.56   | 0.52 | 0.57 |
| Itga4        | 0.29   | 0.37   | 0.52 | 0.57 |
| Frrmpd1      | 1.41   | 1.40   | 0.52 | 0.50 |
| Plekhh2      | 0.67   | 0.73   | 0.52 | 0.53 |
| Npas3        | 2.29   | 2.33   | 0.52 | 0.55 |
| Htr3a        | 0.49   | 0.47   | 0.52 | 0.60 |
| 4831426I19Ri | 0.14   | 0.11   | 0.52 | 0.41 |
| Thbs2        | 0.27   | 0.40   | 0.52 | 0.63 |
| Snai2        | 0.31   | 0.31   | 0.52 | 0.59 |
| 4930578M01R  | 0.61   | 0.65   | 0.52 | 0.76 |
| Plekhn1      | 1.19   | 1.25   | 0.52 | 0.55 |
| Ii2ra        | 0.09   | 0.06   | 0.52 | 0.32 |
| Mustn1       | 0.70   | 1.05   | 0.52 | 1.08 |
| Dazap2       | 41.61  | 42.79  | 0.52 | 0.54 |
| Phlpp1       | 9.34   | 9.40   | 0.52 | 0.53 |
| Mbtd1        | 3.95   | 4.14   | 0.52 | 0.57 |
| Slc38a9      | 0.91   | 1.02   | 0.52 | 0.58 |
| Pex5l        | 20.82  | 21.82  | 0.52 | 0.57 |
| Gm13157      | 0.60   | 0.57   | 0.52 | 0.61 |
| Rela         | 3.94   | 3.53   | 0.52 | 0.48 |
| Ccnd2        | 2.09   | 2.25   | 0.52 | 0.57 |
| Fign         | 0.87   | 0.88   | 0.52 | 0.57 |
| Kdm6a        | 2.80   | 2.97   | 0.52 | 0.59 |
| Atf7         | 0.78   | 0.65   | 0.52 | 0.52 |
| Nostrin      | 0.38   | 0.34   | 0.52 | 0.45 |
| Zfp167       | 0.86   | 0.68   | 0.52 | 0.42 |
| 1700101E01Ri | 0.68   | 0.41   | 0.52 | 0.42 |
| Krt18        | 1.25   | 1.48   | 0.52 | 0.67 |
| 4930519F09Ri | 0.64   | 0.73   | 0.52 | 0.64 |
| Syk          | 0.35   | 0.35   | 0.51 | 0.54 |
| St18         | 1.95   | 2.23   | 0.51 | 0.60 |
| Gm4925       | 0.53   | 0.55   | 0.51 | 0.65 |
| 2310008H04R  | 0.43   | 0.42   | 0.51 | 0.50 |
| Traf6        | 2.11   | 2.27   | 0.51 | 0.61 |
| Lrp6         | 2.00   | 2.02   | 0.51 | 0.53 |
| AI317395     | 0.25   | 0.20   | 0.51 | 0.47 |
| Abi3         | 2.25   | 2.31   | 0.51 | 0.55 |
| Rnd2         | 156.27 | 152.84 | 0.51 | 0.49 |
| Lpcat3       | 1.36   | 1.32   | 0.51 | 0.49 |
| Zzef1        | 2.30   | 2.60   | 0.51 | 0.59 |
| Fancd2       | 0.19   | 0.27   | 0.51 | 0.72 |
| A130077B15R  | 7.45   | 7.91   | 0.51 | 0.56 |
| Gm19434      | 0.09   | 0.07   | 0.51 | 0.42 |
| Cacna1s      | 0.15   | 0.13   | 0.51 | 0.46 |
| Recq14       | 0.17   | 0.18   | 0.51 | 0.52 |
| 3110057O12R  | 2.90   | 2.89   | 0.51 | 0.56 |
| BC039771     | 0.18   | 0.15   | 0.51 | 0.49 |
| Ppil6        | 1.81   | 1.87   | 0.51 | 0.61 |
| Tcf19        | 0.54   | 0.57   | 0.51 | 0.56 |
| Ryk          | 3.31   | 3.26   | 0.51 | 0.51 |

|              |       |        |      |      |
|--------------|-------|--------|------|------|
| Crot         | 4.06  | 4.51   | 0.51 | 0.60 |
| Inhba        | 0.13  | 0.14   | 0.51 | 0.45 |
| Atp6v0e      | 9.43  | 9.71   | 0.51 | 0.56 |
| Lgals3       | 0.77  | 0.70   | 0.51 | 0.59 |
| Il11         | 0.39  | 0.43   | 0.51 | 0.60 |
| Rgs6         | 2.51  | 2.49   | 0.51 | 0.48 |
| Scarb1       | 3.51  | 3.75   | 0.51 | 0.57 |
| Paqr8        | 3.71  | 4.20   | 0.51 | 0.54 |
| Pofut1       | 2.17  | 2.36   | 0.51 | 0.57 |
| Eci1         | 9.70  | 9.17   | 0.51 | 0.50 |
| Psg23        | 0.40  | 0.41   | 0.51 | 0.55 |
| Serping1     | 0.68  | 0.76   | 0.51 | 0.49 |
| A830082K12R  | 2.03  | 2.25   | 0.51 | 0.55 |
| Grm3         | 1.22  | 1.24   | 0.51 | 0.50 |
| Kif13a       | 3.34  | 3.19   | 0.51 | 0.49 |
| Ccdc134      | 1.21  | 1.47   | 0.51 | 0.58 |
| Zfp568       | 0.40  | 0.43   | 0.51 | 0.55 |
| Dennd4c      | 1.96  | 1.98   | 0.51 | 0.51 |
| Chrb3        | 0.10  | 0.12   | 0.51 | 0.56 |
| Pomc         | 19.21 | 22.04  | 0.51 | 0.56 |
| Ids          | 89.44 | 106.44 | 0.51 | 0.61 |
| Gm7102       | 1.54  | 1.32   | 0.51 | 0.46 |
| Herc6        | 0.52  | 0.44   | 0.51 | 0.46 |
| Pkp2         | 1.51  | 1.50   | 0.51 | 0.54 |
| Catsper2     | 0.57  | 0.48   | 0.51 | 0.52 |
| Flt3         | 0.74  | 0.97   | 0.51 | 0.67 |
| Sox6         | 1.38  | 1.47   | 0.51 | 0.58 |
| Pvr          | 0.73  | 0.71   | 0.51 | 0.42 |
| Gpr179       | 0.17  | 0.20   | 0.51 | 0.64 |
| Gpr88        | 4.10  | 4.05   | 0.51 | 0.66 |
| Pttg1ip      | 7.15  | 7.82   | 0.51 | 0.55 |
| Inha         | 8.25  | 7.04   | 0.51 | 0.46 |
| Ick          | 2.56  | 2.66   | 0.51 | 0.54 |
| 2310015A10R  | 2.42  | 2.75   | 0.51 | 0.60 |
| Clgn         | 1.52  | 1.78   | 0.51 | 0.56 |
| Sirt7        | 2.63  | 2.56   | 0.51 | 0.55 |
| Rab32        | 0.52  | 0.55   | 0.51 | 0.47 |
| Invs         | 1.81  | 1.72   | 0.51 | 0.52 |
| Slc1a5       | 0.26  | 0.21   | 0.51 | 0.31 |
| Rin2         | 2.91  | 2.88   | 0.51 | 0.50 |
| Dhrs4        | 3.18  | 3.19   | 0.51 | 0.49 |
| 4933421O10R  | 2.76  | 2.82   | 0.51 | 0.55 |
| Gpr182       | 0.48  | 0.68   | 0.51 | 0.58 |
| Lass3        | 0.07  | 0.07   | 0.51 | 0.40 |
| Gdf10        | 0.37  | 0.48   | 0.51 | 0.51 |
| Ddhd1        | 9.65  | 10.20  | 0.50 | 0.53 |
| Cdh23        | 0.16  | 0.18   | 0.50 | 0.42 |
| Mycbp2       | 16.17 | 16.52  | 0.50 | 0.53 |
| Nacc2        | 11.25 | 11.28  | 0.50 | 0.52 |
| Tmem170      | 0.93  | 0.97   | 0.50 | 0.54 |
| Dpp4         | 0.13  | 0.12   | 0.50 | 0.43 |
| Rtkn2        | 0.50  | 0.66   | 0.50 | 0.53 |
| Tgfb3        | 0.89  | 0.85   | 0.50 | 0.49 |
| Cntnap3      | 0.41  | 0.49   | 0.50 | 0.65 |
| Spry2        | 5.43  | 6.39   | 0.50 | 0.60 |
| Tmem39a      | 1.61  | 1.82   | 0.50 | 0.56 |
| Trank1       | 8.21  | 8.75   | 0.50 | 0.52 |
| Prkrir       | 11.87 | 12.35  | 0.50 | 0.53 |
| Golgb1       | 6.12  | 6.24   | 0.50 | 0.53 |
| Dnmt3a       | 5.23  | 5.07   | 0.50 | 0.52 |
| Spon1        | 3.69  | 4.55   | 0.50 | 0.60 |
| Fam53b       | 2.31  | 2.28   | 0.50 | 0.48 |
| Pkn2         | 2.18  | 2.46   | 0.50 | 0.57 |
| 2610028E06Ri | 0.30  | 0.18   | 0.50 | 0.40 |
| Plxnd1       | 0.52  | 0.63   | 0.50 | 0.43 |

|              |       |       |      |      |
|--------------|-------|-------|------|------|
| 3110056003R  | 1.32  | 1.39  | 0.50 | 0.50 |
| Fads1        | 11.58 | 12.73 | 0.50 | 0.55 |
| Pcsk6        | 1.01  | 1.23  | 0.50 | 0.58 |
| Lama5        | 0.20  | 0.21  | 0.50 | 0.47 |
| Gimap8       | 0.10  | 0.13  | 0.50 | 0.55 |
| Nup210       | 1.34  | 1.43  | 0.50 | 0.54 |
| Lmo7         | 0.80  | 0.82  | 0.50 | 0.50 |
| Tmem149      | 0.55  | 0.39  | 0.50 | 0.34 |
| Ctla2a       | 1.10  | 1.32  | 0.50 | 0.63 |
| Thap2        | 2.69  | 3.05  | 0.50 | 0.62 |
| Gm16515      | 1.55  | 1.65  | 0.50 | 0.52 |
| Inhbb        | 0.41  | 0.57  | 0.50 | 0.62 |
| Col4a2       | 0.92  | 1.21  | 0.50 | 0.71 |
| Gm14322      | 3.28  | 3.38  | 0.50 | 0.60 |
| Kalrn        | 4.21  | 4.13  | 0.50 | 0.50 |
| A430107P09R  | 0.37  | 0.45  | 0.50 | 0.60 |
| Acaa2        | 5.59  | 5.57  | 0.50 | 0.50 |
| Chuk         | 6.84  | 7.09  | 0.50 | 0.57 |
| 2700081L22Ri | 1.24  | 1.12  | 0.50 | 0.56 |
| Ndst3        | 1.56  | 1.75  | 0.50 | 0.51 |
| Bach2        | 0.53  | 0.52  | 0.50 | 0.53 |
| Fam123b      | 0.74  | 0.86  | 0.50 | 0.61 |
| C030044B11R  | 13.47 | 14.02 | 0.50 | 0.56 |
| Heg1         | 0.28  | 0.31  | 0.50 | 0.52 |
| Ribc1        | 0.27  | 0.36  | 0.50 | 0.81 |
| Lpxn         | 0.31  | 0.32  | 0.50 | 0.45 |
| Parp4        | 0.52  | 0.63  | 0.50 | 0.55 |
| Lass2        | 8.71  | 10.22 | 0.50 | 0.51 |
| Gabbr2       | 0.24  | 0.17  | 0.50 | 0.31 |
| Ankhd1       | 3.01  | 3.20  | 0.50 | 0.53 |
| Jhdm1d       | 2.10  | 2.44  | 0.50 | 0.61 |
| Acot11       | 3.45  | 3.40  | 0.50 | 0.49 |
| Scn8a        | 4.16  | 4.63  | 0.50 | 0.54 |
| Bsn          | 2.92  | 3.33  | 0.50 | 0.51 |
| Vmn1r65      | 0.13  | 0.16  | 0.50 | 0.53 |
| Sema7a       | 3.23  | 3.58  | 0.50 | 0.55 |
| Zfp641       | 2.35  | 2.52  | 0.50 | 0.62 |
| AA543186     | 0.14  | 0.08  | 0.50 | 0.40 |
| Oprd1        | 0.53  | 0.63  | 0.50 | 0.69 |
| Fam54a       | 0.11  | 0.09  | 0.50 | 0.42 |
| Nek2         | 0.26  | 0.26  | 0.50 | 0.62 |
| 4921508A21R  | 0.63  | 0.60  | 0.50 | 0.52 |
| Dnajc25      | 0.74  | 0.75  | 0.50 | 0.62 |
| Cmklr1       | 0.11  | 0.14  | 0.50 | 0.43 |
| A630089N07R  | 2.77  | 2.59  | 0.50 | 0.46 |
| Crtc3        | 2.33  | 2.55  | 0.50 | 0.57 |
| Zfp429       | 0.25  | 0.34  | 0.50 | 0.82 |
| 9430091E24Ri | 0.75  | 0.82  | 0.50 | 0.63 |
| Usp48        | 8.00  | 7.86  | 0.50 | 0.52 |
| Dll4         | 0.09  | 0.11  | 0.49 | 0.47 |
| Sh3bp4       | 2.26  | 2.30  | 0.49 | 0.52 |
| Wrn          | 1.29  | 1.46  | 0.49 | 0.57 |
| Tbx19        | 0.24  | 0.24  | 0.49 | 0.45 |
| Plcg2        | 0.60  | 0.64  | 0.49 | 0.59 |
| Cabp4        | 0.22  | 0.27  | 0.49 | 0.54 |
| Parp12       | 1.45  | 1.39  | 0.49 | 0.47 |
| Il12rb1      | 0.16  | 0.14  | 0.49 | 0.30 |
| Csgalnact2   | 2.40  | 2.55  | 0.49 | 0.61 |
| Mtbp         | 0.44  | 0.39  | 0.49 | 0.43 |
| Arsj         | 0.13  | 0.19  | 0.49 | 0.78 |
| Itga10       | 0.15  | 0.15  | 0.49 | 0.55 |
| Clk1         | 12.26 | 13.49 | 0.49 | 0.60 |
| Tbkbp1       | 7.17  | 7.58  | 0.49 | 0.51 |
| Vav3         | 1.95  | 1.97  | 0.49 | 0.51 |
| Ccnl2        | 6.48  | 6.81  | 0.49 | 0.54 |

|             |        |        |      |      |
|-------------|--------|--------|------|------|
| Pik3c2g     | 0.11   | 0.10   | 0.49 | 0.47 |
| Adcy1       | 2.72   | 3.19   | 0.49 | 0.50 |
| Adam21      | 0.34   | 0.34   | 0.49 | 0.65 |
| Cbln3       | 0.18   | 0.17   | 0.49 | 0.50 |
| Stard5      | 1.49   | 1.56   | 0.49 | 0.53 |
| Rgs1        | 0.08   | 0.06   | 0.49 | 0.33 |
| Onecut2     | 0.60   | 0.59   | 0.49 | 0.56 |
| Chst7       | 0.23   | 0.20   | 0.49 | 0.67 |
| Tek         | 0.12   | 0.23   | 0.49 | 1.13 |
| Mdm4        | 6.41   | 6.85   | 0.49 | 0.56 |
| Ncan        | 1.59   | 1.84   | 0.49 | 0.53 |
| Cdkn1c      | 1.95   | 2.13   | 0.49 | 0.53 |
| Kif19a      | 0.95   | 0.98   | 0.49 | 0.54 |
| Il1r1       | 0.17   | 0.22   | 0.49 | 0.72 |
| Nt5e        | 0.44   | 0.49   | 0.49 | 0.64 |
| Adora1      | 6.97   | 7.43   | 0.49 | 0.51 |
| Ftl1        | 186.77 | 177.31 | 0.49 | 0.47 |
| Rbak        | 1.67   | 1.71   | 0.49 | 0.56 |
| Speer7-ps1  | 0.22   | 0.27   | 0.49 | 0.35 |
| 1700003M07R | 3.90   | 4.66   | 0.49 | 0.53 |
| Rbm12b      | 1.45   | 1.62   | 0.49 | 0.61 |
| A730056A06R | 1.05   | 1.04   | 0.49 | 0.48 |
| Pigh        | 5.41   | 5.84   | 0.49 | 0.53 |
| Plagl2      | 0.95   | 1.04   | 0.49 | 0.62 |
| 2610203C20R | 17.71  | 15.94  | 0.49 | 0.53 |
| Gm2115      | 1.50   | 1.68   | 0.49 | 0.59 |
| Gpt2        | 7.12   | 7.36   | 0.49 | 0.47 |
| Cebpa       | 1.30   | 1.24   | 0.49 | 0.39 |
| Cebpd       | 0.41   | 0.30   | 0.49 | 0.35 |
| Acad10      | 0.33   | 0.34   | 0.49 | 0.48 |
| Ints2       | 1.66   | 1.77   | 0.49 | 0.57 |
| 1700096K18R | 1.62   | 1.91   | 0.49 | 0.61 |
| Rbm20       | 0.33   | 0.39   | 0.49 | 0.68 |
| 1600012H06R | 2.60   | 2.88   | 0.49 | 0.57 |
| Lhx6        | 4.97   | 3.69   | 0.49 | 0.49 |
| 9330159M07R | 0.57   | 0.67   | 0.49 | 0.58 |
| Tal1        | 0.25   | 0.25   | 0.49 | 0.75 |
| Mospd2      | 1.75   | 1.90   | 0.49 | 0.57 |
| Gm13629     | 2.95   | 3.52   | 0.49 | 0.57 |
| Fads2       | 10.71  | 12.29  | 0.49 | 0.51 |
| Pstpip2     | 2.49   | 3.33   | 0.49 | 0.53 |
| 4921531C22R | 0.57   | 0.47   | 0.49 | 0.40 |
| E2f5        | 3.66   | 4.30   | 0.49 | 0.61 |
| Greb1l      | 0.59   | 0.67   | 0.49 | 0.57 |
| Cd44        | 0.37   | 0.48   | 0.49 | 0.54 |
| Ddr1        | 5.41   | 6.15   | 0.49 | 0.52 |
| Llg1        | 6.19   | 6.47   | 0.49 | 0.52 |
| Yod1        | 1.33   | 1.50   | 0.49 | 0.62 |
| Ogt         | 25.51  | 27.40  | 0.49 | 0.57 |
| Rhou        | 8.79   | 8.20   | 0.49 | 0.40 |
| Nfat5       | 4.79   | 5.35   | 0.49 | 0.55 |
| Kcnt1       | 4.78   | 4.84   | 0.49 | 0.49 |
| Tbc1d2      | 0.22   | 0.24   | 0.49 | 0.41 |
| Aldh3a1     | 0.11   | 0.09   | 0.49 | 0.29 |
| Pip4k2a     | 17.23  | 17.01  | 0.49 | 0.49 |
| Plxnb1      | 1.81   | 2.09   | 0.49 | 0.54 |
| Mfap3       | 1.94   | 2.12   | 0.49 | 0.55 |
| Ston1       | 0.52   | 0.52   | 0.49 | 0.50 |
| Cybrd1      | 0.21   | 0.23   | 0.49 | 0.43 |
| Snhg6       | 13.47  | 11.80  | 0.49 | 0.40 |
| 1110035M17R | 2.02   | 2.57   | 0.49 | 0.57 |
| Cck         | 17.91  | 20.61  | 0.48 | 0.40 |
| Zfp488      | 6.05   | 6.23   | 0.48 | 0.50 |
| Popdc3      | 0.28   | 0.28   | 0.48 | 0.63 |
| Kcnc3       | 4.15   | 4.59   | 0.48 | 0.52 |



|              |       |       |      |      |
|--------------|-------|-------|------|------|
| Kdelc1       | 1.29  | 1.41  | 0.48 | 0.60 |
| Gm6300       | 1.42  | 1.45  | 0.48 | 0.54 |
| Shmt1        | 0.37  | 0.47  | 0.48 | 0.69 |
| 4930555I21Ri | 0.37  | 0.48  | 0.48 | 0.49 |
| Tmem181a     | 6.96  | 7.34  | 0.48 | 0.56 |
| Dync1h1      | 16.62 | 16.85 | 0.48 | 0.50 |
| Cyth1        | 12.11 | 11.84 | 0.48 | 0.48 |
| Plod2        | 0.57  | 0.67  | 0.48 | 0.60 |
| 1700001K19Ri | 0.76  | 0.83  | 0.48 | 0.48 |
| Mme          | 0.90  | 0.94  | 0.48 | 0.58 |
| 1110019D14R  | 0.73  | 0.76  | 0.48 | 0.70 |
| Zkscan2      | 2.42  | 2.44  | 0.48 | 0.56 |
| Ppp1r16b     | 7.07  | 7.42  | 0.48 | 0.47 |
| Moxd1        | 0.38  | 0.39  | 0.48 | 0.44 |
| 2210039B01Ri | 0.94  | 1.05  | 0.48 | 0.50 |
| Kcnab3       | 6.03  | 5.78  | 0.48 | 0.46 |
| Trim56       | 0.23  | 0.14  | 0.48 | 0.32 |
| Vit          | 0.51  | 0.64  | 0.48 | 0.56 |
| Cpsf4        | 5.53  | 5.29  | 0.48 | 0.50 |
| Sft2d2       | 2.23  | 2.41  | 0.48 | 0.53 |
| Tfpi         | 0.56  | 0.67  | 0.48 | 0.59 |
| Sh3d19       | 1.77  | 1.70  | 0.48 | 0.47 |
| Dennd1c      | 0.33  | 0.28  | 0.48 | 0.43 |
| Gm17296      | 0.62  | 0.62  | 0.48 | 0.45 |
| Tdrd6        | 0.15  | 0.16  | 0.48 | 0.65 |
| Marveld2     | 0.29  | 0.29  | 0.48 | 0.55 |
| Mns1         | 1.17  | 1.10  | 0.48 | 0.55 |
| Anxa4        | 1.08  | 1.07  | 0.48 | 0.48 |
| Slc25a37     | 4.15  | 4.22  | 0.48 | 0.53 |
| Rttm         | 0.41  | 0.43  | 0.48 | 0.54 |
| 1700016K19Ri | 2.29  | 2.34  | 0.48 | 0.53 |
| Lrrc2        | 0.53  | 0.51  | 0.48 | 0.51 |
| Slc24a4      | 0.63  | 0.85  | 0.48 | 0.66 |
| Mif4gd       | 4.29  | 3.92  | 0.48 | 0.44 |
| B3galti      | 1.23  | 1.29  | 0.48 | 0.50 |
| 2810459M11Ri | 1.88  | 1.77  | 0.48 | 0.43 |
| Arl13b       | 1.74  | 2.23  | 0.48 | 0.64 |
| Brwd3        | 0.51  | 0.54  | 0.48 | 0.49 |
| Vmn1r58      | 2.53  | 2.86  | 0.48 | 0.59 |
| Atp8b5       | 0.09  | 0.07  | 0.48 | 0.36 |
| Stat6        | 0.64  | 0.83  | 0.48 | 0.54 |
| Zfp518a      | 1.21  | 1.33  | 0.48 | 0.65 |
| Gm10406      | 2.72  | 3.64  | 0.48 | 0.80 |
| Gbp3         | 0.31  | 0.33  | 0.48 | 0.42 |
| Traf4        | 2.01  | 1.76  | 0.48 | 0.42 |
| Odf3b        | 1.27  | 0.97  | 0.48 | 0.40 |
| Acot1        | 2.75  | 2.43  | 0.48 | 0.44 |
| Oplah        | 1.88  | 2.05  | 0.48 | 0.51 |
| Zfp862       | 1.07  | 1.15  | 0.48 | 0.51 |
| Rrbp1        | 1.87  | 2.46  | 0.48 | 0.60 |
| Mpp6         | 8.82  | 9.40  | 0.48 | 0.52 |
| Sema5b       | 0.50  | 0.48  | 0.48 | 0.48 |
| 2610005L07Ri | 9.97  | 11.22 | 0.48 | 0.53 |
| BC021785     | 0.14  | 0.14  | 0.48 | 0.51 |
| Lef1         | 0.79  | 0.79  | 0.48 | 0.45 |
| Dcdc2b       | 0.46  | 0.49  | 0.48 | 0.49 |
| Gk5          | 0.32  | 0.27  | 0.48 | 0.50 |
| 6820431F20Ri | 69.00 | 79.68 | 0.48 | 0.57 |
| lfrd1        | 11.32 | 11.45 | 0.48 | 0.51 |
| Elf5         | 0.11  | 0.09  | 0.47 | 0.44 |
| Ppm1j        | 0.30  | 0.31  | 0.47 | 0.52 |
| Gm527        | 1.84  | 1.96  | 0.47 | 0.56 |
| Efemp2       | 3.09  | 2.92  | 0.47 | 0.49 |
| Mapkapk3     | 0.40  | 0.37  | 0.47 | 0.46 |
| Tekt4        | 0.85  | 0.70  | 0.47 | 0.40 |

|              |       |       |      |      |
|--------------|-------|-------|------|------|
| Epha3        | 0.21  | 0.19  | 0.47 | 0.46 |
| Mcc          | 0.57  | 0.61  | 0.47 | 0.54 |
| Hvcn1        | 1.18  | 1.29  | 0.47 | 0.53 |
| 9230112J17Ri | 0.15  | 0.11  | 0.47 | 0.62 |
| Mcm10        | 0.11  | 0.08  | 0.47 | 0.29 |
| Plscr4       | 1.38  | 1.41  | 0.47 | 0.46 |
| Herc2        | 8.78  | 9.06  | 0.47 | 0.49 |
| Emr1         | 0.16  | 0.18  | 0.47 | 0.53 |
| Rbm38        | 0.94  | 0.95  | 0.47 | 0.42 |
| Rdh1         | 0.11  | 0.11  | 0.47 | 0.51 |
| Gpr137b-ps   | 0.26  | 0.24  | 0.47 | 0.45 |
| Pthlh        | 0.91  | 1.20  | 0.47 | 0.70 |
| Cpxm2        | 0.25  | 0.29  | 0.47 | 0.45 |
| Gpr137b      | 1.77  | 1.86  | 0.47 | 0.49 |
| Dera         | 1.10  | 1.33  | 0.47 | 0.67 |
| Wdr95        | 0.14  | 0.16  | 0.47 | 0.51 |
| Lmbr1l       | 1.30  | 1.50  | 0.47 | 0.63 |
| Cbx2         | 0.42  | 0.35  | 0.47 | 0.50 |
| Fzd7         | 0.36  | 0.40  | 0.47 | 0.41 |
| Plcd1        | 1.35  | 1.17  | 0.47 | 0.42 |
| Jam3         | 5.11  | 5.27  | 0.47 | 0.48 |
| Zcchc7       | 7.59  | 7.66  | 0.47 | 0.48 |
| Cdca8        | 0.27  | 0.29  | 0.47 | 0.51 |
| Ptpn3        | 2.12  | 2.18  | 0.47 | 0.45 |
| Fbln5        | 0.21  | 0.31  | 0.47 | 0.50 |
| Tsc22d4      | 11.18 | 10.75 | 0.47 | 0.43 |
| 9930005F22Ri | 0.29  | 0.37  | 0.47 | 0.85 |
| Gm16287      | 0.24  | 0.31  | 0.47 | 0.64 |
| 1700029G01R  | 0.31  | 0.43  | 0.47 | 0.72 |
| Insr         | 2.11  | 2.40  | 0.47 | 0.54 |
| C130071C03Ri | 0.34  | 0.39  | 0.47 | 0.68 |
| Arhgap4      | 0.26  | 0.24  | 0.47 | 0.51 |
| Krt80        | 0.05  | 0.02  | 0.47 | 0.13 |
| Tfcp2l1      | 0.11  | 0.17  | 0.47 | 0.76 |
| Rsu1         | 7.01  | 7.06  | 0.47 | 0.49 |
| 6030429G01R  | 0.37  | 0.45  | 0.47 | 0.57 |
| Cd160        | 0.29  | 0.32  | 0.47 | 0.94 |
| Golm1        | 0.49  | 0.54  | 0.47 | 0.51 |
| Tjp1         | 4.06  | 4.38  | 0.47 | 0.51 |
| A430078G23Ri | 1.04  | 1.04  | 0.47 | 0.50 |
| Suv420h2     | 1.89  | 1.90  | 0.47 | 0.55 |
| Nxph2        | 0.26  | 0.38  | 0.47 | 0.75 |
| Avil         | 0.13  | 0.09  | 0.47 | 0.28 |
| Sox13        | 1.42  | 1.43  | 0.47 | 0.49 |
| C030046E11Ri | 2.88  | 3.01  | 0.47 | 0.54 |
| Hic2         | 0.64  | 0.66  | 0.47 | 0.56 |
| Ttc18        | 0.27  | 0.26  | 0.47 | 0.43 |
| Olf1033      | 0.12  | 0.11  | 0.47 | 0.68 |
| Epn3         | 0.73  | 0.66  | 0.47 | 0.41 |
| Pld2         | 2.31  | 2.38  | 0.46 | 0.45 |
| Gulp1        | 1.84  | 2.15  | 0.46 | 0.66 |
| Prrt4        | 0.86  | 0.87  | 0.46 | 0.51 |
| Arhgap18     | 2.95  | 2.89  | 0.46 | 0.51 |
| 2900092D14Ri | 2.07  | 2.52  | 0.46 | 0.60 |
| Eya1         | 0.43  | 0.42  | 0.46 | 0.37 |
| Usp40        | 2.11  | 1.97  | 0.46 | 0.48 |
| Tpmt         | 2.43  | 2.50  | 0.46 | 0.48 |
| Rps6kb2      | 1.98  | 2.24  | 0.46 | 0.54 |
| Dnahc5       | 0.23  | 0.26  | 0.46 | 0.51 |
| Gm606        | 0.09  | 0.09  | 0.46 | 0.41 |
| Cenpf        | 0.11  | 0.13  | 0.46 | 0.69 |
| Atp11a       | 3.67  | 4.26  | 0.46 | 0.53 |
| Mylk         | 0.47  | 0.56  | 0.46 | 0.47 |
| Aqp11        | 3.01  | 3.29  | 0.46 | 0.51 |
| Soat1        | 0.91  | 1.14  | 0.46 | 0.55 |

|              |       |       |      |      |
|--------------|-------|-------|------|------|
| Gm15417      | 1.68  | 1.78  | 0.46 | 0.52 |
| Myh9         | 1.69  | 1.92  | 0.46 | 0.54 |
| Hsd17b7      | 1.72  | 1.92  | 0.46 | 0.53 |
| Apcdd1       | 0.77  | 0.89  | 0.46 | 0.48 |
| Ano2         | 0.10  | 0.13  | 0.46 | 0.80 |
| Edem1        | 1.39  | 1.53  | 0.46 | 0.47 |
| Emx1         | 0.12  | 0.06  | 0.46 | 0.09 |
| 1200009106R1 | 0.35  | 0.36  | 0.46 | 0.46 |
| Gm9766       | 1.13  | 0.94  | 0.46 | 0.41 |
| Abca4        | 0.05  | 0.06  | 0.46 | 0.32 |
| Slc26a4      | 0.07  | 0.07  | 0.46 | 0.25 |
| Naa40        | 2.80  | 2.89  | 0.46 | 0.47 |
| Ccdc68       | 0.15  | 0.08  | 0.46 | 0.32 |
| Steap3       | 0.46  | 0.57  | 0.46 | 0.53 |
| Dock8        | 0.20  | 0.22  | 0.46 | 0.53 |
| Krt12        | 0.32  | 0.27  | 0.46 | 0.25 |
| Nrtn         | 1.07  | 0.62  | 0.46 | 0.24 |
| Asb14        | 0.14  | 0.08  | 0.46 | 0.24 |
| Ctdsp2       | 9.05  | 9.35  | 0.46 | 0.47 |
| Arrdc3       | 9.11  | 10.52 | 0.46 | 0.54 |
| Scml2        | 0.30  | 0.25  | 0.46 | 0.41 |
| Scd3         | 0.73  | 0.75  | 0.46 | 0.52 |
| Coro6        | 2.43  | 2.83  | 0.46 | 0.67 |
| Tie1         | 0.08  | 0.23  | 0.46 | 1.42 |
| Ctrl         | 0.53  | 0.46  | 0.46 | 0.58 |
| Rnf43        | 0.21  | 0.20  | 0.46 | 0.37 |
| Rspo3        | 0.78  | 1.10  | 0.46 | 0.57 |
| Tmem144      | 0.81  | 0.97  | 0.46 | 0.49 |
| Spop         | 47.56 | 44.62 | 0.46 | 0.45 |
| Wnt9a        | 0.36  | 0.39  | 0.46 | 0.44 |
| Foxq1        | 0.21  | 0.29  | 0.46 | 0.78 |
| Sema3d       | 0.49  | 0.75  | 0.46 | 0.66 |
| Tmprss7      | 0.23  | 0.19  | 0.46 | 0.46 |
| Scube2       | 0.22  | 0.21  | 0.46 | 0.46 |
| Sertad3      | 1.02  | 1.23  | 0.46 | 0.56 |
| Zkscan17     | 1.47  | 1.29  | 0.46 | 0.41 |
| Cox6a2       | 3.49  | 4.81  | 0.46 | 0.62 |
| Casp6        | 0.69  | 0.83  | 0.46 | 0.51 |
| Panx2        | 11.66 | 11.64 | 0.46 | 0.49 |
| Mms22l       | 0.12  | 0.16  | 0.46 | 0.66 |
| Zfp329       | 3.60  | 3.95  | 0.46 | 0.58 |
| Stxbp6       | 11.20 | 12.18 | 0.46 | 0.52 |
| Arid3b       | 0.43  | 0.43  | 0.45 | 0.51 |
| Ccnt2        | 4.90  | 5.15  | 0.45 | 0.48 |
| Dnahc2       | 0.16  | 0.15  | 0.45 | 0.47 |
| 1700019G17R  | 1.62  | 1.54  | 0.45 | 0.45 |
| 6430550D23R  | 0.11  | 0.08  | 0.45 | 0.35 |
| Mfap5        | 0.09  | 0.06  | 0.45 | 0.25 |
| Sel1l3       | 1.16  | 1.33  | 0.45 | 0.54 |
| Lama3        | 0.14  | 0.13  | 0.45 | 0.45 |
| Tead3        | 0.44  | 0.50  | 0.45 | 0.54 |
| Cacng7       | 40.80 | 43.53 | 0.45 | 0.50 |
| Slc4a2       | 3.26  | 3.35  | 0.45 | 0.49 |
| Kynu         | 0.08  | 0.09  | 0.45 | 0.40 |
| Plaur        | 0.05  | 0.06  | 0.45 | 0.31 |
| Otud7b       | 3.48  | 3.65  | 0.45 | 0.47 |
| Stx2         | 3.02  | 3.15  | 0.45 | 0.48 |
| Lifr         | 0.87  | 0.98  | 0.45 | 0.50 |
| D930048N14R  | 0.42  | 0.43  | 0.45 | 0.56 |
| Snx22        | 5.91  | 6.29  | 0.45 | 0.49 |
| Sspn         | 0.82  | 0.95  | 0.45 | 0.49 |
| Alms1-ps2    | 0.13  | 0.21  | 0.45 | 0.47 |
| Vipr1        | 0.07  | 0.08  | 0.45 | 0.33 |
| Ctso         | 2.11  | 2.40  | 0.45 | 0.47 |
| Elmod2       | 2.73  | 3.16  | 0.45 | 0.60 |

|              |       |       |      |      |
|--------------|-------|-------|------|------|
| Adamts18     | 0.20  | 0.26  | 0.45 | 0.57 |
| 2810454H06R  | 0.25  | 0.17  | 0.45 | 0.44 |
| Arsg         | 3.02  | 3.76  | 0.45 | 0.49 |
| Smad3        | 2.10  | 2.20  | 0.45 | 0.46 |
| Pdzrn3       | 0.57  | 0.59  | 0.45 | 0.35 |
| Tmem136      | 2.47  | 2.95  | 0.45 | 0.52 |
| Stard13      | 1.05  | 1.07  | 0.45 | 0.49 |
| Dclre1c      | 1.56  | 1.80  | 0.45 | 0.54 |
| Rnft1        | 1.05  | 1.28  | 0.45 | 0.61 |
| 3830431G21R  | 0.75  | 0.80  | 0.45 | 0.43 |
| Chi3l1       | 1.85  | 2.20  | 0.45 | 0.48 |
| Rnpepl1      | 3.48  | 3.31  | 0.45 | 0.47 |
| Pi4k2b       | 0.52  | 0.69  | 0.45 | 0.68 |
| Elt1d1       | 0.12  | 0.26  | 0.45 | 1.02 |
| Kcnp3        | 5.98  | 5.69  | 0.45 | 0.46 |
| Met          | 0.12  | 0.19  | 0.45 | 0.67 |
| 4930422G04R  | 0.25  | 0.27  | 0.45 | 0.54 |
| Kcnq4        | 0.43  | 0.23  | 0.45 | 0.33 |
| Gm4961       | 0.10  | 0.12  | 0.45 | 0.51 |
| Bst2         | 0.73  | 0.66  | 0.45 | 0.37 |
| Nsun7        | 1.65  | 1.50  | 0.45 | 0.53 |
| Smad6        | 0.19  | 0.16  | 0.45 | 0.41 |
| Lrrc23       | 3.39  | 3.43  | 0.45 | 0.55 |
| Vamp3        | 10.01 | 9.74  | 0.45 | 0.46 |
| Vcl          | 2.49  | 2.72  | 0.45 | 0.50 |
| Lrp8         | 3.77  | 3.76  | 0.45 | 0.48 |
| Pof1b        | 0.13  | 0.13  | 0.45 | 0.63 |
| Grk4         | 1.44  | 1.83  | 0.45 | 0.57 |
| Phf21b       | 0.67  | 0.70  | 0.45 | 0.47 |
| Epha8        | 0.30  | 0.31  | 0.45 | 0.52 |
| 0610007N19R  | 1.17  | 1.23  | 0.45 | 0.57 |
| Gm9159       | 0.83  | 0.92  | 0.45 | 0.48 |
| Arid5a       | 0.49  | 0.51  | 0.45 | 0.41 |
| Aspdh        | 0.29  | 0.43  | 0.45 | 0.91 |
| Pde3b        | 1.56  | 1.84  | 0.45 | 0.57 |
| Myo5b        | 0.64  | 0.71  | 0.44 | 0.41 |
| Atad2b       | 1.64  | 1.87  | 0.44 | 0.51 |
| Afap1l1      | 1.29  | 1.55  | 0.44 | 0.49 |
| Slc22a4      | 1.78  | 1.95  | 0.44 | 0.50 |
| Rest         | 0.45  | 0.56  | 0.44 | 0.64 |
| Slain1       | 13.85 | 14.07 | 0.44 | 0.44 |
| Rhoj         | 0.87  | 0.83  | 0.44 | 0.44 |
| Ankrd16      | 3.15  | 3.18  | 0.44 | 0.46 |
| Tgfa         | 2.90  | 3.17  | 0.44 | 0.48 |
| Prkch        | 1.66  | 1.45  | 0.44 | 0.42 |
| Dcdc2c       | 1.84  | 1.71  | 0.44 | 0.48 |
| A330093E20R  | 0.60  | 0.72  | 0.44 | 0.48 |
| Lyst         | 1.66  | 1.65  | 0.44 | 0.46 |
| Mlf1         | 1.69  | 1.68  | 0.44 | 0.51 |
| Zc3hav1      | 0.35  | 0.31  | 0.44 | 0.39 |
| Igf1         | 0.34  | 0.43  | 0.44 | 0.42 |
| Dtl          | 0.05  | 0.07  | 0.44 | 0.22 |
| Fanca        | 0.26  | 0.34  | 0.44 | 0.64 |
| Prr18        | 5.38  | 5.11  | 0.44 | 0.41 |
| Ccdc81       | 0.78  | 0.66  | 0.44 | 0.48 |
| 1700026J04Ri | 0.14  | 0.17  | 0.44 | 0.56 |
| Peli2        | 2.25  | 2.16  | 0.44 | 0.42 |
| Cd248        | 0.09  | 0.06  | 0.44 | 0.27 |
| Ank2         | 24.42 | 25.36 | 0.44 | 0.46 |
| Ptplad2      | 0.21  | 0.25  | 0.44 | 0.49 |
| Mvp          | 1.11  | 0.99  | 0.44 | 0.39 |
| Lmx1a        | 0.56  | 0.92  | 0.44 | 0.53 |
| Dnajc1       | 1.42  | 1.31  | 0.44 | 0.42 |
| Serpinh1     | 0.84  | 0.94  | 0.44 | 0.53 |
| Cyfip1       | 3.34  | 3.28  | 0.44 | 0.43 |

|              |       |       |      |      |
|--------------|-------|-------|------|------|
| Prx          | 0.07  | 0.07  | 0.44 | 0.47 |
| St3gal6      | 1.39  | 1.91  | 0.44 | 0.56 |
| Pqlc3        | 0.30  | 0.31  | 0.44 | 0.53 |
| AA474331     | 1.25  | 1.64  | 0.44 | 0.58 |
| Susd5        | 0.35  | 0.48  | 0.44 | 0.52 |
| Ccdc88a      | 3.62  | 3.88  | 0.44 | 0.50 |
| Mctp2        | 0.16  | 0.19  | 0.44 | 0.45 |
| Tmem198b     | 0.88  | 1.29  | 0.44 | 0.59 |
| Crabp2       | 1.29  | 1.51  | 0.44 | 0.36 |
| Ss18         | 4.37  | 4.45  | 0.44 | 0.44 |
| Acvrl1       | 0.14  | 0.32  | 0.44 | 0.85 |
| Tmco4        | 0.27  | 0.34  | 0.44 | 0.43 |
| Lrp1         | 7.17  | 7.41  | 0.44 | 0.46 |
| Efhb         | 0.19  | 0.20  | 0.44 | 0.71 |
| Arnt         | 2.97  | 3.24  | 0.44 | 0.47 |
| Ccnyl1       | 3.15  | 3.29  | 0.44 | 0.48 |
| 1700112E06Ri | 0.44  | 0.31  | 0.44 | 0.32 |
| Plekhb1      | 72.29 | 77.86 | 0.44 | 0.47 |
| Dqx1         | 0.07  | 0.06  | 0.44 | 0.51 |
| Cdc14a       | 0.82  | 0.71  | 0.44 | 0.41 |
| Arhgap17     | 1.43  | 1.37  | 0.43 | 0.45 |
| 2700023E23Ri | 1.27  | 1.36  | 0.43 | 0.55 |
| E030030I06Ri | 0.63  | 0.72  | 0.43 | 0.56 |
| Fn1          | 0.20  | 0.36  | 0.43 | 0.66 |
| 2310039L15Ri | 1.98  | 2.33  | 0.43 | 0.54 |
| Ttll13       | 0.19  | 0.22  | 0.43 | 0.62 |
| Casc1        | 0.23  | 0.22  | 0.43 | 0.42 |
| Hist4h4      | 0.18  | 0.19  | 0.43 | 0.53 |
| Crff1        | 0.18  | 0.13  | 0.43 | 0.35 |
| Nfix         | 3.94  | 3.63  | 0.43 | 0.39 |
| Nccrp1       | 0.11  | 0.09  | 0.43 | 0.38 |
| Spnb2        | 14.51 | 15.81 | 0.43 | 0.49 |
| Nkain4       | 7.43  | 7.89  | 0.43 | 0.44 |
| Btaf1        | 1.56  | 1.76  | 0.43 | 0.51 |
| Atr          | 0.98  | 1.04  | 0.43 | 0.45 |
| LOC622552    | 0.22  | 0.26  | 0.43 | 0.42 |
| Vim          | 8.94  | 8.72  | 0.43 | 0.42 |
| Ankrd53      | 0.10  | 0.08  | 0.43 | 0.24 |
| 2610002D18R  | 0.18  | 0.10  | 0.43 | 0.68 |
| Vsig10       | 0.18  | 0.24  | 0.43 | 0.57 |
| Ptch1        | 3.18  | 3.54  | 0.43 | 0.50 |
| Car3         | 0.21  | 0.16  | 0.43 | 0.29 |
| Adam28       | 0.07  | 0.05  | 0.43 | 0.28 |
| A330069E16R  | 2.44  | 2.31  | 0.43 | 0.47 |
| 2610100L16Ri | 3.39  | 3.81  | 0.43 | 0.46 |
| Ripk1        | 0.74  | 0.66  | 0.43 | 0.39 |
| Tspan14      | 2.09  | 2.33  | 0.43 | 0.46 |
| Aim2         | 0.56  | 0.55  | 0.43 | 0.50 |
| Cxcl16       | 0.20  | 0.20  | 0.43 | 0.39 |
| Usp2         | 2.46  | 2.66  | 0.43 | 0.44 |
| Map3k8       | 0.11  | 0.07  | 0.43 | 0.27 |
| Pik3ap1      | 0.21  | 0.17  | 0.43 | 0.38 |
| Stom         | 0.65  | 0.79  | 0.43 | 0.56 |
| Ctgf         | 0.47  | 0.56  | 0.43 | 0.33 |
| Sox21        | 1.22  | 1.21  | 0.43 | 0.40 |
| 1110028C15Ri | 1.62  | 1.86  | 0.43 | 0.50 |
| Adamts1      | 0.18  | 0.23  | 0.43 | 0.46 |
| Zfp182       | 1.27  | 1.44  | 0.43 | 0.49 |
| Cacna1e      | 2.76  | 3.30  | 0.43 | 0.51 |
| Cth          | 0.96  | 0.84  | 0.43 | 0.41 |
| Cep192       | 0.66  | 0.76  | 0.42 | 0.50 |
| Neurog2      | 0.29  | 0.48  | 0.42 | 0.83 |
| Spsb1        | 2.10  | 2.61  | 0.42 | 0.54 |
| Tshr         | 0.09  | 0.12  | 0.42 | 0.52 |
| Car4         | 0.62  | 0.83  | 0.42 | 0.44 |

|               |       |       |      |      |
|---------------|-------|-------|------|------|
| Lysmd3        | 1.58  | 1.80  | 0.42 | 0.54 |
| Sh3glb1       | 6.68  | 7.31  | 0.42 | 0.48 |
| Gm2a          | 2.25  | 2.50  | 0.42 | 0.45 |
| Klhl5         | 6.47  | 6.13  | 0.42 | 0.43 |
| Ado           | 6.81  | 6.89  | 0.42 | 0.42 |
| Ifitm2        | 2.67  | 2.72  | 0.42 | 0.39 |
| Tnc           | 0.10  | 0.14  | 0.42 | 0.48 |
| Hspa2         | 3.57  | 3.66  | 0.42 | 0.40 |
| C030034I22Rif | 0.84  | 1.00  | 0.42 | 0.68 |
| Tmtc3         | 1.03  | 1.31  | 0.42 | 0.55 |
| Rho           | 0.07  | 0.06  | 0.42 | 0.46 |
| Doc2g         | 0.58  | 0.45  | 0.42 | 0.43 |
| Kcnq1ot1      | 0.14  | 0.14  | 0.42 | 0.44 |
| Dsg2          | 0.11  | 0.09  | 0.42 | 0.37 |
| Pyroxd2       | 0.57  | 0.63  | 0.42 | 0.46 |
| Lamc1         | 0.72  | 0.83  | 0.42 | 0.47 |
| Mll1          | 5.03  | 5.44  | 0.42 | 0.45 |
| Klf3          | 1.62  | 1.60  | 0.42 | 0.42 |
| Gbp7          | 0.31  | 0.34  | 0.42 | 0.53 |
| Itgb8         | 0.79  | 0.91  | 0.42 | 0.56 |
| Fgf23         | 0.20  | 0.13  | 0.42 | 0.44 |
| Lcor          | 0.25  | 0.24  | 0.42 | 0.41 |
| Prkcq         | 2.12  | 1.96  | 0.42 | 0.40 |
| Cbr3          | 1.57  | 1.11  | 0.42 | 0.30 |
| Nsl1          | 0.24  | 0.39  | 0.42 | 0.65 |
| Aqp7          | 0.07  | 0.06  | 0.42 | 0.32 |
| Spink10       | 0.96  | 0.80  | 0.42 | 0.45 |
| Mll3          | 3.23  | 3.34  | 0.42 | 0.45 |
| Btbd16        | 0.19  | 0.29  | 0.42 | 0.57 |
| Tcp11         | 0.26  | 0.26  | 0.42 | 0.57 |
| Ccbl2         | 0.72  | 0.72  | 0.42 | 0.38 |
| Atxn7         | 1.49  | 1.58  | 0.42 | 0.46 |
| 6430548G04    | 0.30  | 0.33  | 0.42 | 0.38 |
| Zfyve16       | 1.92  | 2.10  | 0.42 | 0.51 |
| Slc16a3       | 0.27  | 0.46  | 0.42 | 0.69 |
| Vps13c        | 2.04  | 2.20  | 0.42 | 0.46 |
| Map3k1        | 0.60  | 0.59  | 0.42 | 0.42 |
| C7            | 0.08  | 0.14  | 0.42 | 0.70 |
| SmoX          | 8.09  | 8.10  | 0.42 | 0.42 |
| Glis3         | 0.19  | 0.20  | 0.42 | 0.50 |
| Stard6        | 0.81  | 0.98  | 0.42 | 0.48 |
| 9530091C08Rif | 0.12  | 0.11  | 0.42 | 0.52 |
| Clec3b        | 0.93  | 0.98  | 0.41 | 0.38 |
| Fam83d        | 0.21  | 0.23  | 0.41 | 0.34 |
| Ptprz1        | 3.13  | 3.66  | 0.41 | 0.47 |
| Cspp1         | 2.19  | 2.09  | 0.41 | 0.43 |
| Gpsm3         | 1.18  | 1.37  | 0.41 | 0.51 |
| Nras          | 3.51  | 4.05  | 0.41 | 0.49 |
| Bmp6          | 0.40  | 0.45  | 0.41 | 0.30 |
| 2810468N07Rif | 10.46 | 10.99 | 0.41 | 0.44 |
| Gng8          | 0.90  | 0.87  | 0.41 | 0.44 |
| Emx2          | 0.49  | 0.40  | 0.41 | 0.35 |
| Leng8         | 4.38  | 5.02  | 0.41 | 0.44 |
| E330034G19Rif | 0.08  | 0.12  | 0.41 | 0.46 |
| Limd1         | 1.13  | 1.01  | 0.41 | 0.40 |
| 2610017I09Rif | 10.09 | 10.84 | 0.41 | 0.44 |
| Clec14a       | 0.12  | 0.11  | 0.41 | 0.56 |
| Pou2f1        | 1.12  | 1.25  | 0.41 | 0.49 |
| D930016D06Rif | 3.97  | 4.29  | 0.41 | 0.46 |
| Apbb1ip       | 0.80  | 0.86  | 0.41 | 0.41 |
| Nfkbid        | 0.31  | 0.25  | 0.41 | 0.40 |
| Ybx2          | 0.17  | 0.20  | 0.41 | 0.56 |
| BC024479      | 3.81  | 3.45  | 0.41 | 0.39 |
| Pygm          | 3.45  | 3.65  | 0.41 | 0.42 |
| Parvg         | 0.60  | 0.54  | 0.41 | 0.40 |

|              |        |        |      |      |
|--------------|--------|--------|------|------|
| 4933407H18R  | 0.82   | 0.97   | 0.41 | 0.49 |
| N4bp2        | 1.39   | 1.54   | 0.41 | 0.48 |
| Erbp2ip      | 6.92   | 7.63   | 0.41 | 0.46 |
| Prex2        | 2.22   | 2.82   | 0.41 | 0.56 |
| Exd2         | 3.56   | 3.99   | 0.41 | 0.48 |
| E030019B06R  | 1.29   | 1.81   | 0.41 | 0.61 |
| Emilin1      | 0.12   | 0.20   | 0.41 | 0.69 |
| Fgfbp3       | 1.65   | 1.64   | 0.41 | 0.43 |
| Tmem45b      | 0.21   | 0.27   | 0.41 | 0.54 |
| Gm872        | 0.21   | 0.26   | 0.41 | 0.58 |
| Vangl1       | 0.61   | 0.73   | 0.41 | 0.49 |
| Tom1l1       | 4.00   | 3.97   | 0.41 | 0.43 |
| Abtb2        | 1.54   | 1.59   | 0.41 | 0.46 |
| Ptprb        | 0.14   | 0.22   | 0.41 | 0.74 |
| 2410089E03Ri | 3.51   | 3.70   | 0.41 | 0.45 |
| Bmp5         | 0.08   | 0.12   | 0.41 | 0.47 |
| Tgfb1        | 1.27   | 1.61   | 0.41 | 0.50 |
| En1          | 0.16   | 0.17   | 0.41 | 0.53 |
| Gldc         | 0.62   | 0.60   | 0.41 | 0.42 |
| Gramd1c      | 0.42   | 0.54   | 0.41 | 0.59 |
| Arpp21       | 12.12  | 13.13  | 0.41 | 0.43 |
| Ntn1         | 0.56   | 0.73   | 0.41 | 0.53 |
| Tll2         | 0.08   | 0.14   | 0.41 | 0.81 |
| Fes          | 0.23   | 0.23   | 0.41 | 0.34 |
| Atp7b        | 0.16   | 0.14   | 0.41 | 0.33 |
| Lrrc16a      | 1.79   | 1.80   | 0.41 | 0.43 |
| Prdm5        | 0.64   | 0.60   | 0.41 | 0.40 |
| E230029C05Ri | 0.06   | 0.09   | 0.41 | 0.42 |
| Xkrx         | 0.27   | 0.35   | 0.41 | 0.60 |
| Scel         | 0.17   | 0.25   | 0.41 | 0.50 |
| Ttc12        | 0.60   | 0.68   | 0.41 | 0.46 |
| Lpp          | 0.29   | 0.29   | 0.41 | 0.40 |
| Zfp217       | 0.27   | 0.34   | 0.41 | 0.53 |
| 1700102P08Ri | 0.35   | 0.46   | 0.41 | 0.68 |
| Atp10d       | 0.23   | 0.23   | 0.41 | 0.44 |
| Pkd1         | 3.27   | 3.42   | 0.41 | 0.42 |
| Galc         | 1.86   | 2.17   | 0.41 | 0.50 |
| Znrf3        | 0.40   | 0.47   | 0.41 | 0.53 |
| Rhoc         | 4.84   | 4.13   | 0.41 | 0.31 |
| Gpsm2        | 1.34   | 1.40   | 0.41 | 0.40 |
| 9930013L23Ri | 0.26   | 0.30   | 0.40 | 0.46 |
| Abca8b       | 1.10   | 1.58   | 0.40 | 0.57 |
| Rock1        | 2.51   | 2.94   | 0.40 | 0.51 |
| Btn2a2       | 0.07   | 0.09   | 0.40 | 0.63 |
| F2rl3        | 0.13   | 0.21   | 0.40 | 0.63 |
| Ppp4r1       | 3.21   | 3.53   | 0.40 | 0.45 |
| Mgl1         | 5.63   | 5.62   | 0.40 | 0.38 |
| Itfg3        | 1.48   | 1.65   | 0.40 | 0.43 |
| Selenbp1     | 1.35   | 1.33   | 0.40 | 0.40 |
| Bicc1        | 0.52   | 0.50   | 0.40 | 0.38 |
| Pik3c2b      | 1.30   | 1.38   | 0.40 | 0.44 |
| Ptcra        | 0.14   | 0.09   | 0.40 | 0.27 |
| Myom3        | 0.08   | 0.06   | 0.40 | 0.30 |
| C1qtnf6      | 0.19   | 0.21   | 0.40 | 0.37 |
| Avp          | 248.11 | 230.02 | 0.40 | 0.35 |
| Tnfrsf22     | 0.13   | 0.23   | 0.40 | 0.75 |
| Frrs1        | 0.06   | 0.05   | 0.40 | 0.27 |
| Gm1337       | 0.55   | 0.46   | 0.40 | 0.40 |
| 2310042D19R  | 0.51   | 0.54   | 0.40 | 0.49 |
| Lrrc18       | 0.32   | 0.28   | 0.40 | 0.46 |
| Nt5dc1       | 0.57   | 0.54   | 0.40 | 0.62 |
| Ino80d       | 1.36   | 1.43   | 0.40 | 0.45 |
| Fli1         | 0.21   | 0.29   | 0.40 | 0.47 |
| Arsk         | 0.66   | 0.86   | 0.40 | 0.49 |
| Fam25c       | 0.13   | 0.00   | 0.40 | 0.00 |

|             |        |        |      |      |
|-------------|--------|--------|------|------|
| 2610305D13R | 0.29   | 0.24   | 0.40 | 0.42 |
| Dnahc10     | 0.14   | 0.12   | 0.40 | 0.35 |
| C130030K03R | 3.43   | 4.58   | 0.40 | 0.56 |
| Slc22a13b   | 0.08   | 0.07   | 0.40 | 0.32 |
| Kitl        | 1.55   | 1.94   | 0.40 | 0.48 |
| Atg4a       | 1.30   | 1.40   | 0.40 | 0.47 |
| H2-M5       | 0.23   | 0.25   | 0.40 | 0.35 |
| Ptk2b       | 4.66   | 4.94   | 0.40 | 0.34 |
| Tmem229a    | 5.74   | 6.40   | 0.40 | 0.46 |
| Tprn        | 3.03   | 3.15   | 0.40 | 0.39 |
| Ptpn14      | 0.17   | 0.22   | 0.40 | 0.41 |
| Rfx2        | 0.62   | 0.57   | 0.40 | 0.38 |
| Adamts10    | 0.65   | 0.76   | 0.40 | 0.48 |
| Wdr27       | 0.06   | 0.05   | 0.40 | 0.33 |
| Gna12       | 12.60  | 12.16  | 0.40 | 0.40 |
| 5730408K05R | 2.26   | 1.42   | 0.40 | 0.34 |
| 6430411K18R | 3.76   | 4.37   | 0.40 | 0.50 |
| Irgm2       | 0.34   | 0.26   | 0.40 | 0.27 |
| Ptgdr       | 0.11   | 0.12   | 0.40 | 0.38 |
| Nr2e1       | 0.89   | 0.88   | 0.40 | 0.38 |
| Hist1h2be   | 0.51   | 0.42   | 0.40 | 0.37 |
| Ralgapa2    | 1.18   | 1.24   | 0.40 | 0.43 |
| Lhx8        | 2.26   | 1.60   | 0.40 | 0.53 |
| Pdgfrb      | 0.41   | 0.50   | 0.40 | 0.51 |
| Nktr        | 8.34   | 8.57   | 0.40 | 0.42 |
| Gstm1       | 48.61  | 49.33  | 0.40 | 0.40 |
| Fam76b      | 2.93   | 3.23   | 0.40 | 0.48 |
| Cxcl14      | 5.56   | 6.56   | 0.40 | 0.43 |
| 2410004P03R | 2.20   | 2.05   | 0.40 | 0.39 |
| Nr5a1       | 2.40   | 2.37   | 0.39 | 0.38 |
| Cyp4f16     | 0.44   | 0.51   | 0.39 | 0.52 |
| LOC624759   | 0.06   | 0.08   | 0.39 | 0.48 |
| Notch2      | 0.38   | 0.48   | 0.39 | 0.54 |
| Pag1        | 1.23   | 1.41   | 0.39 | 0.44 |
| Has3        | 0.17   | 0.22   | 0.39 | 0.40 |
| Fam193b     | 6.30   | 6.41   | 0.39 | 0.41 |
| Ahnak       | 0.37   | 0.35   | 0.39 | 0.30 |
| Tpm2        | 0.70   | 0.75   | 0.39 | 0.36 |
| Ppp1r3b     | 0.23   | 0.23   | 0.39 | 0.41 |
| Tmc6        | 0.17   | 0.13   | 0.39 | 0.23 |
| Sparcl1     | 41.37  | 50.27  | 0.39 | 0.43 |
| Gpc1        | 6.47   | 6.90   | 0.39 | 0.43 |
| Mocos       | 0.13   | 0.12   | 0.39 | 0.40 |
| Arl5c       | 0.20   | 0.14   | 0.39 | 0.32 |
| Gm10845     | 4.44   | 4.55   | 0.39 | 0.41 |
| Ezh2        | 0.57   | 0.52   | 0.39 | 0.43 |
| Sox12       | 2.44   | 2.44   | 0.39 | 0.39 |
| Cald1       | 3.54   | 3.80   | 0.39 | 0.44 |
| Veph1       | 0.32   | 0.30   | 0.39 | 0.43 |
| Ckap2l      | 0.06   | 0.06   | 0.39 | 0.39 |
| Lif         | 0.06   | 0.04   | 0.39 | 0.26 |
| Fgf2        | 0.47   | 0.38   | 0.39 | 0.28 |
| Eng         | 0.32   | 0.48   | 0.39 | 0.65 |
| Sept1       | 0.45   | 0.50   | 0.39 | 0.48 |
| Gm9895      | 0.28   | 0.48   | 0.39 | 0.45 |
| H2-K2       | 0.21   | 0.24   | 0.39 | 0.55 |
| Pla2g7      | 6.80   | 8.94   | 0.39 | 0.48 |
| Aff1        | 0.69   | 0.79   | 0.39 | 0.53 |
| G2e3        | 0.96   | 1.11   | 0.39 | 0.51 |
| 2900097C17R | 246.31 | 263.30 | 0.39 | 0.45 |
| Cd82        | 2.84   | 3.50   | 0.39 | 0.40 |
| Nr6a1       | 0.60   | 0.61   | 0.39 | 0.41 |
| Tnnt3       | 0.07   | 0.03   | 0.39 | 0.12 |
| Gm13476     | 0.77   | 0.52   | 0.39 | 0.21 |
| Nfatc2ip    | 0.58   | 0.69   | 0.39 | 0.45 |



|              |       |       |      |      |
|--------------|-------|-------|------|------|
| Kif24        | 0.09  | 0.10  | 0.39 | 0.48 |
| Psat1        | 23.41 | 23.15 | 0.39 | 0.38 |
| Runx2        | 0.10  | 0.09  | 0.39 | 0.25 |
| Cklf         | 0.68  | 1.11  | 0.39 | 0.60 |
| Suclg2       | 2.99  | 2.92  | 0.39 | 0.37 |
| Drd1a        | 0.84  | 0.90  | 0.39 | 0.56 |
| Tyr          | 0.45  | 0.46  | 0.39 | 0.49 |
| Myo1d        | 1.39  | 1.44  | 0.39 | 0.38 |
| Tgfb1        | 0.38  | 0.28  | 0.39 | 0.27 |
| Jph1         | 0.72  | 0.68  | 0.39 | 0.35 |
| B4galnt2     | 0.12  | 0.12  | 0.39 | 0.46 |
| Vps13a       | 1.60  | 1.85  | 0.39 | 0.45 |
| Six2         | 0.10  | 0.09  | 0.39 | 0.24 |
| Hps5         | 1.43  | 1.50  | 0.38 | 0.46 |
| Tes          | 0.26  | 0.33  | 0.38 | 0.40 |
| Ccdc108      | 0.34  | 0.33  | 0.38 | 0.39 |
| Usp28        | 1.53  | 1.77  | 0.38 | 0.48 |
| Slc6a13      | 0.38  | 0.30  | 0.38 | 0.25 |
| Kcnk6        | 0.28  | 0.42  | 0.38 | 0.57 |
| Wasf2        | 1.12  | 1.18  | 0.38 | 0.39 |
| Ccdc62       | 0.31  | 0.34  | 0.38 | 0.40 |
| Pou3f1       | 1.85  | 1.50  | 0.38 | 0.36 |
| Ushbp1       | 0.07  | 0.13  | 0.38 | 0.76 |
| E130012A19R  | 0.80  | 0.85  | 0.38 | 0.28 |
| Tnfrsf11a    | 0.22  | 0.24  | 0.38 | 0.46 |
| Glipr2       | 1.07  | 1.01  | 0.38 | 0.34 |
| Smg1         | 5.99  | 5.84  | 0.38 | 0.40 |
| Abhd3        | 4.01  | 5.25  | 0.38 | 0.52 |
| Slc2a9       | 0.08  | 0.11  | 0.38 | 0.52 |
| Scamp2       | 2.09  | 2.19  | 0.38 | 0.40 |
| St6gal1      | 1.07  | 1.13  | 0.38 | 0.39 |
| Tulp3        | 2.21  | 2.41  | 0.38 | 0.45 |
| 1700009P17R  | 2.35  | 1.97  | 0.38 | 0.35 |
| Gbx2         | 1.33  | 1.05  | 0.38 | 0.30 |
| 1700019L03Ri | 0.46  | 0.52  | 0.38 | 0.53 |
| Gas2l3       | 0.11  | 0.10  | 0.38 | 0.38 |
| Arl4d        | 1.96  | 2.19  | 0.38 | 0.35 |
| Sfxn5        | 10.22 | 9.79  | 0.38 | 0.37 |
| Trps1        | 0.87  | 0.88  | 0.38 | 0.41 |
| Lbr          | 1.42  | 1.91  | 0.38 | 0.52 |
| Smpd13a      | 2.16  | 2.50  | 0.38 | 0.46 |
| Vgl14        | 1.90  | 1.86  | 0.38 | 0.42 |
| Hck          | 0.30  | 0.26  | 0.38 | 0.35 |
| Plce1        | 0.68  | 0.69  | 0.38 | 0.36 |
| Shroom4      | 0.07  | 0.09  | 0.38 | 0.68 |
| Psd4         | 0.07  | 0.08  | 0.38 | 0.48 |
| Pear1        | 0.08  | 0.08  | 0.38 | 0.39 |
| Tesk2        | 1.01  | 1.13  | 0.38 | 0.44 |
| Lrmp         | 0.12  | 0.09  | 0.38 | 0.41 |
| Rab37        | 1.29  | 1.53  | 0.38 | 0.37 |
| Birc6        | 4.25  | 4.22  | 0.38 | 0.41 |
| Wdr93        | 0.10  | 0.08  | 0.38 | 0.34 |
| Lepre1       | 0.61  | 0.68  | 0.38 | 0.49 |
| Myzap        | 0.23  | 0.20  | 0.38 | 0.36 |
| Bub1b        | 0.31  | 0.34  | 0.38 | 0.72 |
| Bcl2l11      | 0.45  | 0.47  | 0.38 | 0.40 |
| Dffb         | 1.44  | 1.43  | 0.38 | 0.50 |
| Tagap        | 0.14  | 0.16  | 0.38 | 0.48 |
| Pbld1        | 0.15  | 0.17  | 0.38 | 0.43 |
| BC016579     | 0.10  | 0.07  | 0.38 | 0.30 |
| Ucn3         | 0.70  | 0.92  | 0.38 | 0.43 |
| Dok3         | 0.31  | 0.30  | 0.38 | 0.36 |
| 0610030E20Ri | 1.98  | 2.10  | 0.38 | 0.40 |
| Efemp1       | 0.56  | 0.64  | 0.38 | 0.34 |
| AW011738     | 0.52  | 0.52  | 0.38 | 0.40 |

|               |       |       |      |      |
|---------------|-------|-------|------|------|
| Piga          | 1.13  | 1.14  | 0.38 | 0.38 |
| Tnfaip2       | 0.08  | 0.07  | 0.38 | 0.40 |
| Cdc42ep2      | 5.10  | 6.04  | 0.38 | 0.47 |
| S1pr5         | 2.23  | 2.34  | 0.38 | 0.41 |
| Pla2g4b       | 0.49  | 0.35  | 0.38 | 0.38 |
| Wnt6          | 0.09  | 0.07  | 0.38 | 0.17 |
| Serpnb6b      | 0.24  | 0.15  | 0.38 | 0.23 |
| Ccl9          | 0.15  | 0.08  | 0.38 | 0.22 |
| Murc          | 0.15  | 0.17  | 0.38 | 0.55 |
| Hdx           | 0.39  | 0.41  | 0.37 | 0.46 |
| Dcx           | 2.21  | 2.50  | 0.37 | 0.45 |
| Dot1l         | 1.41  | 1.39  | 0.37 | 0.38 |
| Piwil2        | 0.09  | 0.08  | 0.37 | 0.26 |
| Tanc1         | 1.07  | 1.06  | 0.37 | 0.36 |
| Ptpn18        | 0.26  | 0.20  | 0.37 | 0.28 |
| Gabpb2        | 0.97  | 1.03  | 0.37 | 0.44 |
| Zfp607        | 0.32  | 0.38  | 0.37 | 0.49 |
| Pnpla7        | 0.47  | 0.59  | 0.37 | 0.47 |
| Klf2          | 0.47  | 0.46  | 0.37 | 0.40 |
| Pkd2          | 2.38  | 2.80  | 0.37 | 0.46 |
| Fryl          | 1.91  | 2.06  | 0.37 | 0.43 |
| Skp2          | 0.69  | 0.71  | 0.37 | 0.41 |
| Pon3          | 0.21  | 0.39  | 0.37 | 0.99 |
| Eya4          | 0.17  | 0.16  | 0.37 | 0.32 |
| Hps1          | 0.75  | 0.80  | 0.37 | 0.44 |
| Pigc          | 1.54  | 1.86  | 0.37 | 0.50 |
| Cd209c        | 1.90  | 1.75  | 0.37 | 0.39 |
| Shisa7        | 4.98  | 5.29  | 0.37 | 0.39 |
| Gm1661        | 0.13  | 0.17  | 0.37 | 0.51 |
| Abcc1         | 1.08  | 1.33  | 0.37 | 0.50 |
| Pcolce2       | 0.97  | 0.97  | 0.37 | 0.36 |
| Rbl1          | 0.33  | 0.37  | 0.37 | 0.45 |
| Cmtm6         | 1.70  | 1.83  | 0.37 | 0.41 |
| Ap4e1         | 1.51  | 1.77  | 0.37 | 0.46 |
| Ppp1r3g       | 0.21  | 0.20  | 0.37 | 0.23 |
| Calcr1        | 0.39  | 0.53  | 0.37 | 0.60 |
| Fat4          | 0.25  | 0.26  | 0.37 | 0.38 |
| Epb4.1l2      | 4.76  | 5.05  | 0.37 | 0.38 |
| Dnaic1        | 0.67  | 0.57  | 0.37 | 0.40 |
| Fmnl3         | 0.54  | 0.68  | 0.37 | 0.46 |
| Trim16        | 0.10  | 0.13  | 0.37 | 0.43 |
| Cep164        | 1.04  | 1.10  | 0.37 | 0.41 |
| Gbp5          | 0.11  | 0.17  | 0.37 | 0.63 |
| Apobec1       | 0.36  | 0.27  | 0.37 | 0.31 |
| 6530411M01R   | 0.29  | 0.21  | 0.37 | 0.30 |
| Leprel1       | 0.32  | 0.40  | 0.37 | 0.47 |
| Tcea3         | 0.38  | 0.30  | 0.37 | 0.34 |
| Tmem200b      | 0.16  | 0.17  | 0.37 | 0.59 |
| Gm9897        | 0.34  | 0.33  | 0.37 | 0.38 |
| Unc5b         | 1.13  | 1.51  | 0.37 | 0.47 |
| Phf19         | 0.12  | 0.12  | 0.37 | 0.37 |
| Mx2           | 0.14  | 0.14  | 0.37 | 0.32 |
| Slc37a2       | 0.08  | 0.07  | 0.37 | 0.26 |
| Ano1          | 0.13  | 0.15  | 0.37 | 0.38 |
| Fermt2        | 8.13  | 7.88  | 0.37 | 0.38 |
| Nav2          | 1.36  | 1.37  | 0.37 | 0.37 |
| Emp3          | 0.50  | 0.63  | 0.37 | 0.31 |
| Gpr84         | 0.13  | 0.12  | 0.37 | 0.45 |
| I830077J02Rik | 0.09  | 0.05  | 0.37 | 0.20 |
| Kcnh3         | 0.33  | 0.56  | 0.37 | 0.35 |
| Orc1          | 0.07  | 0.06  | 0.36 | 0.37 |
| Kcna1         | 2.59  | 3.04  | 0.36 | 0.41 |
| Sept2         | 9.69  | 11.01 | 0.36 | 0.43 |
| Tspan2        | 16.25 | 19.55 | 0.36 | 0.44 |
| Dnase2a       | 0.36  | 0.48  | 0.36 | 0.61 |

|              |      |      |      |
|--------------|------|------|------|
| Lat2         | 0.30 | 0.36 | 0.48 |
| Cyp26b1      | 0.31 | 0.40 | 0.30 |
| Chrna1       | 0.16 | 0.17 | 0.38 |
| Csda         | 5.17 | 4.99 | 0.36 |
| D630045J12Ri | 0.99 | 1.17 | 0.40 |
| Tirap        | 0.42 | 0.39 | 0.34 |
| Ndp          | 1.33 | 1.27 | 0.34 |
| Galnt12      | 0.23 | 0.25 | 0.38 |
| Slc14a2      | 0.15 | 0.15 | 0.45 |
| Grb7         | 0.11 | 0.14 | 0.36 |
| Klf4         | 0.35 | 0.37 | 0.42 |
| Cacna1d      | 1.54 | 1.66 | 0.39 |
| Cyp4f13      | 0.81 | 0.78 | 0.37 |
| Gm608        | 1.20 | 1.22 | 0.36 |
| Bmf          | 0.31 | 0.26 | 0.39 |
| Stk10        | 0.45 | 0.44 | 0.36 |
| Cdkn2b       | 0.15 | 0.07 | 0.11 |
| Tiam2        | 0.40 | 0.48 | 0.44 |
| Plekhg1      | 1.44 | 1.51 | 0.35 |
| Hydin        | 0.11 | 0.12 | 0.48 |
| Ip6k3        | 0.12 | 0.12 | 0.31 |
| Atp2a3       | 0.10 | 0.16 | 0.62 |
| Meis1        | 0.85 | 0.93 | 0.37 |
| Cpm          | 0.54 | 0.63 | 0.36 |
| Ptpn13       | 0.68 | 0.77 | 0.37 |
| Als2cl       | 0.59 | 0.81 | 0.48 |
| Atp11c       | 1.22 | 1.42 | 0.49 |
| Pnpla3       | 0.77 | 0.90 | 0.44 |
| Rhobtb3      | 3.32 | 3.57 | 0.41 |
| H2-T24       | 0.56 | 0.71 | 0.41 |
| Ccdc18       | 0.05 | 0.07 | 0.44 |
| Lrrc34       | 0.18 | 0.15 | 0.34 |
| Sash3        | 0.20 | 0.24 | 0.39 |
| Cox4i2       | 0.43 | 0.26 | 0.16 |
| Ltbp1        | 0.09 | 0.14 | 0.56 |
| Rbp1         | 0.82 | 0.80 | 0.34 |
| Dapl1        | 0.49 | 0.75 | 0.56 |
| Gm15408      | 0.15 | 0.13 | 0.28 |
| Tlr7         | 0.06 | 0.06 | 0.28 |
| Morn5        | 0.88 | 0.86 | 0.41 |
| Fyco1        | 2.79 | 2.92 | 0.40 |
| Wdr96        | 0.37 | 0.36 | 0.40 |
| Plod1        | 0.81 | 0.85 | 0.38 |
| 4933432B09Ri | 0.76 | 0.83 | 0.42 |
| Mkrn3        | 0.21 | 0.16 | 0.29 |
| Ggt1         | 0.12 | 0.19 | 0.51 |
| Slc30a2      | 0.12 | 0.15 | 0.52 |
| Prph         | 3.05 | 3.14 | 0.35 |
| Zfp280c      | 2.73 | 3.08 | 0.42 |
| Zc3h12a      | 0.12 | 0.11 | 0.31 |
| Hhip12       | 0.09 | 0.10 | 0.35 |
| Neurod4      | 0.04 | 0.07 | 0.45 |
| Sfn          | 0.23 | 0.22 | 0.53 |
| Frzb         | 0.52 | 0.64 | 0.40 |
| Slc4a7       | 1.32 | 1.41 | 0.40 |
| Isg15        | 0.57 | 0.79 | 0.43 |
| Dnase1l1     | 0.23 | 0.26 | 0.38 |
| Fkbp9        | 0.84 | 0.99 | 0.40 |
| Iqgap1       | 0.91 | 1.02 | 0.43 |
| Rgma         | 3.96 | 4.23 | 0.37 |
| Slc12a9      | 1.43 | 1.68 | 0.39 |
| Sdsl         | 1.72 | 1.76 | 0.41 |
| Cyp39a1      | 0.24 | 0.31 | 0.44 |
| Ikzf2        | 0.23 | 0.24 | 0.42 |
| Depdc7       | 0.48 | 0.47 | 0.32 |

|              |      |      |      |      |
|--------------|------|------|------|------|
| Il16         | 0.14 | 0.18 | 0.35 | 0.62 |
| Stk17b       | 0.46 | 0.50 | 0.35 | 0.37 |
| Kif22        | 0.53 | 0.61 | 0.35 | 0.45 |
| Slc6a9       | 4.13 | 4.88 | 0.35 | 0.38 |
| Ccdc13       | 0.83 | 0.76 | 0.35 | 0.33 |
| Cftr         | 0.09 | 0.10 | 0.35 | 0.62 |
| Fam59b       | 1.75 | 2.06 | 0.35 | 0.38 |
| Lama4        | 0.08 | 0.11 | 0.35 | 0.55 |
| Foxr1        | 0.13 | 0.20 | 0.35 | 0.45 |
| 4932411L15   | 0.81 | 0.84 | 0.35 | 0.35 |
| Nfib         | 1.43 | 1.55 | 0.35 | 0.37 |
| C030037D09R  | 1.17 | 1.27 | 0.35 | 0.48 |
| Ccnb2        | 0.19 | 0.14 | 0.35 | 0.25 |
| Soat2        | 0.07 | 0.08 | 0.35 | 0.51 |
| Pik3r6       | 0.08 | 0.12 | 0.35 | 0.85 |
| Lsr          | 0.18 | 0.29 | 0.35 | 0.63 |
| Srebf1       | 2.29 | 2.89 | 0.34 | 0.42 |
| Npepl1       | 1.78 | 2.06 | 0.34 | 0.39 |
| Smpd4        | 2.43 | 2.38 | 0.34 | 0.36 |
| Ppfbp2       | 1.16 | 1.14 | 0.34 | 0.35 |
| 4930470H14R  | 2.45 | 2.83 | 0.34 | 0.39 |
| Grid2ip      | 0.32 | 0.30 | 0.34 | 0.28 |
| 4933413G19R  | 0.25 | 0.16 | 0.34 | 0.19 |
| Cecr5        | 4.14 | 4.06 | 0.34 | 0.36 |
| Nedd1        | 0.46 | 0.54 | 0.34 | 0.51 |
| Trp73        | 0.31 | 0.24 | 0.34 | 0.31 |
| Lama1        | 0.18 | 0.18 | 0.34 | 0.30 |
| Guf1         | 2.36 | 2.89 | 0.34 | 0.48 |
| Amac1        | 0.05 | 0.03 | 0.34 | 0.21 |
| Hist1h1e     | 0.22 | 0.14 | 0.34 | 0.22 |
| Gm14378      | 0.22 | 0.33 | 0.34 | 0.70 |
| Slc19a3      | 0.10 | 0.16 | 0.34 | 0.72 |
| Ptar1        | 0.44 | 0.75 | 0.34 | 0.64 |
| Adam12       | 0.16 | 0.12 | 0.34 | 0.27 |
| Tdo2         | 0.11 | 0.13 | 0.34 | 0.53 |
| Fcho2        | 2.90 | 3.64 | 0.34 | 0.42 |
| Car1         | 0.05 | 0.03 | 0.34 | 0.14 |
| Antxr1       | 0.81 | 0.95 | 0.34 | 0.39 |
| Fam198b      | 0.09 | 0.11 | 0.34 | 0.50 |
| I830012O16Ri | 0.90 | 0.78 | 0.34 | 0.30 |
| LOC100642166 | 1.13 | 1.41 | 0.34 | 0.46 |
| Nkx2-2       | 2.86 | 2.82 | 0.34 | 0.39 |
| Gm9958       | 0.63 | 0.69 | 0.34 | 0.44 |
| E330020D12R  | 0.27 | 0.27 | 0.34 | 0.40 |
| 2010002N04R  | 1.19 | 1.48 | 0.34 | 0.40 |
| Nkx2-2as     | 0.24 | 0.23 | 0.34 | 0.36 |
| Gimap1       | 0.43 | 0.29 | 0.34 | 0.21 |
| 9430020K01Ri | 0.68 | 0.86 | 0.34 | 0.46 |
| Gm16907      | 0.16 | 0.17 | 0.34 | 0.45 |
| Mosc1        | 0.12 | 0.12 | 0.34 | 0.50 |
| Tifa         | 1.58 | 1.42 | 0.34 | 0.30 |
| Tsnaxip1     | 0.13 | 0.09 | 0.34 | 0.22 |
| Stil         | 0.04 | 0.08 | 0.34 | 0.42 |
| Rd3          | 0.17 | 0.16 | 0.34 | 0.36 |
| Pcgf6        | 3.31 | 3.60 | 0.34 | 0.41 |
| Dna2         | 0.13 | 0.19 | 0.34 | 0.62 |
| Ttll3        | 1.73 | 1.92 | 0.34 | 0.38 |
| Zfp456       | 0.11 | 0.14 | 0.34 | 0.48 |
| Pde4c        | 0.14 | 0.20 | 0.34 | 0.67 |
| Hsd17b14     | 0.09 | 0.10 | 0.34 | 0.40 |
| Vegfa        | 6.04 | 6.72 | 0.34 | 0.39 |
| Abhd5        | 2.46 | 2.79 | 0.34 | 0.39 |
| Rab25        | 0.06 | 0.04 | 0.34 | 0.12 |
| Chpt1        | 4.23 | 5.28 | 0.34 | 0.40 |
| Slc40a1      | 0.38 | 0.45 | 0.33 | 0.41 |

|             |       |       |      |      |
|-------------|-------|-------|------|------|
| Ifi47       | 0.07  | 0.08  | 0.33 | 0.35 |
| Gimap9      | 0.06  | 0.06  | 0.33 | 0.25 |
| Spef2       | 0.16  | 0.12  | 0.33 | 0.41 |
| Ptgs1       | 0.56  | 0.67  | 0.33 | 0.46 |
| Apln        | 1.26  | 1.26  | 0.33 | 0.33 |
| Rab71l      | 0.96  | 0.88  | 0.33 | 0.31 |
| Gm2011      | 0.42  | 0.59  | 0.33 | 0.49 |
| Ccdc11      | 0.21  | 0.23  | 0.33 | 0.46 |
| St6galnac3  | 0.44  | 0.54  | 0.33 | 0.37 |
| Sgpl1       | 1.45  | 1.85  | 0.33 | 0.43 |
| Krt9        | 0.21  | 0.29  | 0.33 | 0.27 |
| Lrp5        | 0.12  | 0.11  | 0.33 | 0.28 |
| St14        | 0.06  | 0.05  | 0.33 | 0.47 |
| Rbm33       | 4.25  | 4.05  | 0.33 | 0.34 |
| Ccdc37      | 0.53  | 0.65  | 0.33 | 0.37 |
| Dsc2        | 0.22  | 0.24  | 0.33 | 0.46 |
| Chd7        | 0.52  | 0.56  | 0.33 | 0.38 |
| Ifi203      | 0.08  | 0.05  | 0.33 | 0.30 |
| Aspg        | 0.22  | 0.36  | 0.33 | 0.44 |
| Dhtkd1      | 0.87  | 0.70  | 0.33 | 0.31 |
| Hadh        | 4.54  | 4.50  | 0.33 | 0.34 |
| Cpne3       | 1.38  | 1.57  | 0.33 | 0.40 |
| Kat2b       | 2.73  | 2.97  | 0.33 | 0.36 |
| C1qtnf5     | 0.96  | 1.18  | 0.33 | 0.37 |
| Tet1        | 0.52  | 0.56  | 0.33 | 0.39 |
| Sept4       | 43.84 | 44.23 | 0.33 | 0.33 |
| Pdpr        | 0.64  | 0.72  | 0.33 | 0.37 |
| Clic4       | 8.20  | 8.12  | 0.33 | 0.34 |
| Kif13b      | 0.97  | 1.09  | 0.33 | 0.38 |
| Tmem82      | 0.12  | 0.11  | 0.33 | 0.35 |
| Cdc42bpg    | 0.20  | 0.18  | 0.33 | 0.31 |
| Ntng2       | 0.84  | 1.19  | 0.33 | 0.41 |
| Slc6a11     | 10.38 | 13.14 | 0.33 | 0.39 |
| Bmp1        | 0.61  | 0.78  | 0.33 | 0.38 |
| Lhx9        | 0.94  | 0.93  | 0.33 | 0.31 |
| Exph5       | 0.07  | 0.11  | 0.33 | 0.47 |
| Rorc        | 0.48  | 0.47  | 0.33 | 0.38 |
| Myh14       | 1.64  | 1.72  | 0.33 | 0.36 |
| 4833427G06R | 0.37  | 0.55  | 0.33 | 0.48 |
| Iqca        | 0.13  | 0.08  | 0.33 | 0.25 |
| Ryr1        | 0.15  | 0.19  | 0.33 | 0.45 |
| Gprc5b      | 5.42  | 6.51  | 0.33 | 0.37 |
| Stra6       | 0.10  | 0.09  | 0.33 | 0.40 |
| Timp3       | 3.99  | 5.36  | 0.33 | 0.41 |
| Abca1       | 0.55  | 0.69  | 0.33 | 0.39 |
| Six4        | 0.07  | 0.07  | 0.33 | 0.42 |
| Cldn5       | 0.67  | 1.62  | 0.33 | 0.98 |
| Slc12a2     | 3.46  | 4.44  | 0.33 | 0.42 |
| Vip         | 2.89  | 2.72  | 0.33 | 0.28 |
| Styx        | 1.60  | 1.89  | 0.33 | 0.40 |
| Parp9       | 0.23  | 0.21  | 0.33 | 0.32 |
| Cwh43       | 0.11  | 0.11  | 0.33 | 0.35 |
| Nfkbiz      | 0.28  | 0.34  | 0.33 | 0.41 |
| Clec4a2     | 0.11  | 0.13  | 0.33 | 0.36 |
| Grin2c      | 0.60  | 0.62  | 0.33 | 0.31 |
| Il6ra       | 0.09  | 0.09  | 0.33 | 0.24 |
| Fmo2        | 0.07  | 0.09  | 0.33 | 0.39 |
| Qprt        | 0.11  | 0.07  | 0.33 | 0.23 |
| Gng12       | 5.14  | 5.64  | 0.32 | 0.38 |
| Lima1       | 0.64  | 0.81  | 0.32 | 0.38 |
| Klk8        | 0.09  | 0.08  | 0.32 | 0.29 |
| Pla2g5      | 0.16  | 0.15  | 0.32 | 0.25 |
| Meis2       | 5.18  | 4.56  | 0.32 | 0.33 |
| Ocln        | 0.14  | 0.18  | 0.32 | 0.44 |
| Ccdc114     | 0.30  | 0.30  | 0.32 | 0.27 |

|              |        |        |      |      |
|--------------|--------|--------|------|------|
| Gxylt1       | 1.04   | 1.26   | 0.32 | 0.41 |
| Cplx3        | 0.24   | 0.34   | 0.32 | 0.35 |
| Wif1         | 0.40   | 0.51   | 0.32 | 0.41 |
| Rac2         | 0.24   | 0.25   | 0.32 | 0.32 |
| Acy3         | 0.38   | 0.44   | 0.32 | 0.30 |
| Tnfsf10      | 0.10   | 0.13   | 0.32 | 0.45 |
| Scn7a        | 0.42   | 0.65   | 0.32 | 0.50 |
| Mpeg1        | 0.34   | 0.51   | 0.32 | 0.57 |
| Fam70b       | 0.13   | 0.09   | 0.32 | 0.15 |
| 4932412H11R  | 0.05   | 0.10   | 0.32 | 0.64 |
| Fndc8        | 0.27   | 0.31   | 0.32 | 0.50 |
| Sept10       | 0.79   | 0.90   | 0.32 | 0.40 |
| Cnn3         | 13.78  | 13.59  | 0.32 | 0.33 |
| Rassf2       | 3.76   | 3.91   | 0.32 | 0.32 |
| Ubr4         | 7.39   | 7.29   | 0.32 | 0.32 |
| Lrat         | 0.10   | 0.09   | 0.32 | 0.35 |
| Tssk4        | 0.12   | 0.13   | 0.32 | 0.53 |
| Rffl         | 2.43   | 2.56   | 0.32 | 0.38 |
| Pram1        | 0.14   | 0.11   | 0.32 | 0.29 |
| Prkdc        | 0.68   | 0.75   | 0.32 | 0.36 |
| Gas1         | 0.60   | 0.58   | 0.32 | 0.30 |
| Fam71f2      | 0.18   | 0.21   | 0.32 | 0.60 |
| Hspb3        | 0.38   | 0.37   | 0.32 | 0.39 |
| Ntrk1        | 0.27   | 0.28   | 0.32 | 0.39 |
| Fam20a       | 0.75   | 0.94   | 0.32 | 0.39 |
| Plekhf2      | 1.11   | 0.99   | 0.32 | 0.35 |
| Pycard       | 0.36   | 0.30   | 0.32 | 0.24 |
| Trip6        | 0.63   | 0.62   | 0.32 | 0.35 |
| Crispld2     | 0.11   | 0.19   | 0.32 | 0.62 |
| Rasl12       | 0.40   | 0.31   | 0.32 | 0.25 |
| D7Ertd443e   | 0.64   | 0.67   | 0.32 | 0.33 |
| Lrrc39       | 0.32   | 0.39   | 0.32 | 0.41 |
| Kcnj8        | 0.12   | 0.18   | 0.32 | 0.54 |
| Cpsf4l       | 0.09   | 0.07   | 0.32 | 0.23 |
| Col4a5       | 0.05   | 0.08   | 0.32 | 0.44 |
| Enpp1        | 0.19   | 0.29   | 0.32 | 0.48 |
| Map6d1       | 4.56   | 5.10   | 0.32 | 0.36 |
| Abcb4        | 0.24   | 0.38   | 0.32 | 0.51 |
| Gsn          | 4.16   | 4.03   | 0.32 | 0.29 |
| Lgals1       | 1.56   | 1.35   | 0.32 | 0.24 |
| Sox2ot       | 7.93   | 8.21   | 0.32 | 0.34 |
| Slc29a3      | 0.49   | 0.58   | 0.32 | 0.36 |
| Ttyh1        | 10.79  | 12.43  | 0.32 | 0.34 |
| Fbxw15       | 0.25   | 0.16   | 0.31 | 0.21 |
| Scn4b        | 1.31   | 1.51   | 0.31 | 0.42 |
| Anxa2        | 3.46   | 2.81   | 0.31 | 0.26 |
| 2310014L17Ri | 0.56   | 0.59   | 0.31 | 0.34 |
| Lgals9       | 0.60   | 0.58   | 0.31 | 0.34 |
| Nrm          | 0.17   | 0.21   | 0.31 | 0.38 |
| Ovol1        | 0.10   | 0.09   | 0.31 | 0.31 |
| Bcl2l15      | 0.11   | 0.13   | 0.31 | 0.23 |
| Enpp2        | 8.24   | 10.05  | 0.31 | 0.34 |
| Mef2b        | 0.15   | 0.27   | 0.31 | 0.62 |
| Slc2a10      | 0.07   | 0.07   | 0.31 | 0.32 |
| D16Ertd472e  | 0.91   | 1.09   | 0.31 | 0.36 |
| Adora2b      | 0.29   | 0.38   | 0.31 | 0.38 |
| Abcb1b       | 0.13   | 0.13   | 0.31 | 0.31 |
| Uhrf1        | 0.10   | 0.10   | 0.31 | 0.33 |
| Rai14        | 0.31   | 0.39   | 0.31 | 0.39 |
| Dst          | 7.79   | 8.06   | 0.31 | 0.33 |
| Hip1         | 1.47   | 1.61   | 0.31 | 0.35 |
| Sh3rf2       | 0.07   | 0.05   | 0.31 | 0.59 |
| Fth1         | 819.90 | 783.43 | 0.31 | 0.31 |
| Myb          | 0.21   | 0.20   | 0.31 | 0.36 |
| Frem1        | 0.12   | 0.11   | 0.31 | 0.29 |

|              |       |       |      |      |
|--------------|-------|-------|------|------|
| Adamtsl3     | 0.05  | 0.06  | 0.31 | 0.34 |
| Naprt1       | 0.66  | 0.72  | 0.31 | 0.31 |
| Galnt3       | 0.07  | 0.10  | 0.31 | 0.41 |
| Entpd1       | 0.40  | 0.50  | 0.31 | 0.41 |
| Frmd4b       | 0.82  | 1.01  | 0.31 | 0.37 |
| Tmem86b      | 0.79  | 0.48  | 0.31 | 0.22 |
| Itga7        | 0.35  | 0.37  | 0.31 | 0.36 |
| Ttc21a       | 0.23  | 0.23  | 0.31 | 0.39 |
| Smyd1        | 0.42  | 0.39  | 0.31 | 0.33 |
| Igfn1        | 0.01  | 0.05  | 0.31 | 0.24 |
| Slc22a5      | 1.64  | 1.90  | 0.31 | 0.38 |
| Col4a1       | 0.38  | 0.50  | 0.31 | 0.41 |
| Zfp185       | 0.05  | 0.07  | 0.31 | 0.35 |
| Tet3         | 1.30  | 1.35  | 0.31 | 0.33 |
| Gm5860       | 0.22  | 0.25  | 0.31 | 0.44 |
| Gpr146       | 0.59  | 0.65  | 0.31 | 0.38 |
| Pm20d1       | 0.07  | 0.11  | 0.31 | 0.48 |
| Anxa9        | 0.39  | 0.35  | 0.31 | 0.24 |
| B930059L03Ri | 0.35  | 0.39  | 0.31 | 0.36 |
| Mmd2         | 10.78 | 12.68 | 0.31 | 0.38 |
| Jag1         | 0.18  | 0.28  | 0.31 | 0.56 |
| Ssfa2        | 1.76  | 1.99  | 0.31 | 0.34 |
| Tpcn1        | 1.00  | 1.05  | 0.31 | 0.31 |
| Trim72       | 0.07  | 0.08  | 0.31 | 0.30 |
| Bmx          | 0.05  | 0.04  | 0.31 | 0.32 |
| Omd          | 0.37  | 0.39  | 0.31 | 0.38 |
| Gm16576      | 0.05  | 0.07  | 0.31 | 0.45 |
| Cxcl12       | 0.91  | 1.53  | 0.31 | 0.48 |
| Msx1         | 0.11  | 0.09  | 0.31 | 0.23 |
| Lrrc32       | 0.07  | 0.13  | 0.30 | 0.59 |
| Tlr2         | 0.13  | 0.22  | 0.30 | 0.47 |
| Slc25a21     | 0.10  | 0.07  | 0.30 | 0.18 |
| Wnt2         | 0.15  | 0.13  | 0.30 | 0.45 |
| Nkx6-1       | 0.13  | 0.07  | 0.30 | 0.44 |
| Lcp1         | 0.72  | 0.86  | 0.30 | 0.37 |
| Stab1        | 0.07  | 0.09  | 0.30 | 0.42 |
| Prox2        | 0.29  | 0.33  | 0.30 | 0.37 |
| Acad12       | 0.23  | 0.24  | 0.30 | 0.37 |
| AW112010     | 0.13  | 0.08  | 0.30 | 0.19 |
| Myo9b        | 2.15  | 2.15  | 0.30 | 0.30 |
| Gpam         | 2.13  | 2.17  | 0.30 | 0.30 |
| Wls          | 1.33  | 1.86  | 0.30 | 0.39 |
| Rgs22        | 0.20  | 0.21  | 0.30 | 0.41 |
| Slco5a1      | 0.13  | 0.21  | 0.30 | 0.59 |
| 1700023L04Ri | 0.43  | 0.18  | 0.30 | 0.11 |
| Lrrc33       | 0.14  | 0.18  | 0.30 | 0.33 |
| Kcne4        | 0.08  | 0.05  | 0.30 | 0.24 |
| Gm1574       | 0.21  | 0.17  | 0.30 | 0.46 |
| B4galt1      | 0.30  | 0.38  | 0.30 | 0.37 |
| 1810020O05R  | 0.33  | 0.31  | 0.30 | 0.35 |
| Lrig1        | 1.92  | 2.20  | 0.30 | 0.34 |
| Slc25a45     | 0.35  | 0.47  | 0.30 | 0.40 |
| Slc16a9      | 0.18  | 0.36  | 0.30 | 0.56 |
| BC030867     | 0.09  | 0.07  | 0.30 | 0.38 |
| Ccdc88c      | 0.48  | 0.54  | 0.30 | 0.32 |
| Sfxn2        | 0.33  | 0.39  | 0.30 | 0.34 |
| Svil         | 0.25  | 0.33  | 0.30 | 0.39 |
| Bank1        | 0.12  | 0.13  | 0.30 | 0.39 |
| Tgif2        | 0.34  | 0.30  | 0.30 | 0.31 |
| Adamts19     | 0.06  | 0.07  | 0.30 | 0.32 |
| Dapp1        | 0.33  | 0.32  | 0.30 | 0.31 |
| Lsp1         | 0.65  | 0.98  | 0.30 | 0.41 |
| Lpin3        | 0.05  | 0.06  | 0.30 | 0.46 |
| Maf          | 0.87  | 1.03  | 0.30 | 0.33 |
| Atp11b       | 3.70  | 5.00  | 0.30 | 0.41 |

|              |       |       |      |      |
|--------------|-------|-------|------|------|
| Xist         | 0.32  | 0.99  | 0.30 | 1.33 |
| Itga6        | 0.44  | 0.52  | 0.30 | 0.41 |
| Ephb4        | 0.11  | 0.12  | 0.30 | 0.39 |
| Ubn2         | 1.88  | 1.91  | 0.30 | 0.31 |
| Csmd3        | 1.33  | 1.49  | 0.30 | 0.35 |
| A330048O09R  | 0.69  | 0.61  | 0.30 | 0.29 |
| Col6a2       | 0.10  | 0.15  | 0.30 | 0.39 |
| Ggta1        | 0.22  | 0.33  | 0.30 | 0.43 |
| Gm10560      | 1.64  | 1.24  | 0.30 | 0.26 |
| 6030407O03R  | 0.05  | 0.04  | 0.30 | 0.24 |
| Slc16a6      | 0.87  | 0.91  | 0.30 | 0.37 |
| Adam8        | 0.06  | 0.07  | 0.30 | 0.33 |
| Mll2         | 1.52  | 1.64  | 0.30 | 0.34 |
| Tjap1        | 1.75  | 1.90  | 0.30 | 0.36 |
| Hist2h3c1    | 0.72  | 0.49  | 0.30 | 0.23 |
| Igf2bp2      | 0.05  | 0.04  | 0.30 | 0.29 |
| Pparg        | 0.10  | 0.17  | 0.30 | 0.40 |
| Lhfp         | 1.70  | 2.18  | 0.30 | 0.35 |
| Txinb        | 0.08  | 0.08  | 0.30 | 0.29 |
| 1300014I06Ri | 1.38  | 1.23  | 0.30 | 0.26 |
| Smo          | 0.79  | 1.04  | 0.30 | 0.37 |
| Clic1        | 1.71  | 1.34  | 0.30 | 0.25 |
| Gpr156       | 0.13  | 0.16  | 0.30 | 0.46 |
| Cdk3-ps      | 0.11  | 0.13  | 0.30 | 0.24 |
| Tcn2         | 0.70  | 1.12  | 0.30 | 0.48 |
| Vgll2        | 0.20  | 0.25  | 0.30 | 0.32 |
| Gdnf         | 0.06  | 0.04  | 0.30 | 0.21 |
| Gm101        | 0.08  | 0.05  | 0.30 | 0.24 |
| Gsta3        | 0.28  | 0.26  | 0.29 | 0.27 |
| 2810433D01R  | 0.03  | 0.02  | 0.29 | 0.10 |
| Gbx1         | 0.31  | 0.12  | 0.29 | 0.16 |
| Pltp         | 1.40  | 2.82  | 0.29 | 0.60 |
| Fam69c       | 0.43  | 0.58  | 0.29 | 0.45 |
| Prom1        | 0.10  | 0.21  | 0.29 | 0.60 |
| 4930590J08Ri | 0.05  | 0.05  | 0.29 | 0.32 |
| Hist1h4i     | 1.35  | 1.40  | 0.29 | 0.34 |
| Catsperg1    | 0.06  | 0.09  | 0.29 | 0.72 |
| Fam181b      | 3.82  | 3.62  | 0.29 | 0.28 |
| Lims2        | 2.28  | 1.92  | 0.29 | 0.25 |
| 4932438A13R  | 2.78  | 3.16  | 0.29 | 0.34 |
| Swap70       | 0.42  | 0.56  | 0.29 | 0.42 |
| Ptprd        | 4.32  | 5.55  | 0.29 | 0.37 |
| Hspb1        | 1.72  | 1.71  | 0.29 | 0.28 |
| Slc16a10     | 0.12  | 0.20  | 0.29 | 0.45 |
| Atp10b       | 0.08  | 0.12  | 0.29 | 0.35 |
| Pvalb        | 10.73 | 11.96 | 0.29 | 0.34 |
| Ctnnal1      | 1.98  | 2.15  | 0.29 | 0.34 |
| Cmah         | 0.33  | 0.35  | 0.29 | 0.32 |
| Bcan         | 4.26  | 5.40  | 0.29 | 0.37 |
| Frmf8        | 3.06  | 3.04  | 0.29 | 0.29 |
| Zfp648       | 0.09  | 0.14  | 0.29 | 0.76 |
| Adh1         | 0.11  | 0.09  | 0.29 | 0.28 |
| Nrsn1        | 84.69 | 91.58 | 0.29 | 0.33 |
| Col11a1      | 0.08  | 0.12  | 0.29 | 0.45 |
| Itgav        | 0.69  | 0.91  | 0.29 | 0.38 |
| Slc12a1      | 0.03  | 0.04  | 0.29 | 0.26 |
| Mcam         | 0.91  | 1.15  | 0.29 | 0.35 |
| Thbd         | 0.15  | 0.23  | 0.29 | 0.34 |
| Sp1          | 1.53  | 1.57  | 0.29 | 0.33 |
| Gbp1         | 0.03  | 0.06  | 0.29 | 0.20 |
| Chst3        | 0.19  | 0.25  | 0.29 | 0.45 |
| Pion         | 0.36  | 0.46  | 0.29 | 0.47 |
| Ctxn3        | 2.32  | 2.55  | 0.29 | 0.31 |
| Ptrf         | 1.27  | 1.31  | 0.29 | 0.31 |
| Dhrs3        | 1.32  | 1.49  | 0.29 | 0.35 |



|              |      |      |      |      |
|--------------|------|------|------|------|
| Ppp1r3c      | 2.82 | 2.88 | 0.29 | 0.33 |
| Phldb1       | 5.58 | 5.76 | 0.29 | 0.30 |
| Il21r        | 0.05 | 0.03 | 0.29 | 0.15 |
| Slc30a3      | 0.57 | 0.91 | 0.29 | 0.25 |
| Ngfr         | 0.71 | 0.80 | 0.29 | 0.35 |
| Ttc14        | 2.54 | 2.67 | 0.29 | 0.34 |
| Cdon         | 0.44 | 0.53 | 0.29 | 0.33 |
| Mfsd2b       | 0.10 | 0.09 | 0.29 | 0.32 |
| Edaradd      | 0.05 | 0.04 | 0.29 | 0.28 |
| Galnt4       | 0.08 | 0.08 | 0.29 | 0.22 |
| Htra1        | 2.81 | 3.73 | 0.29 | 0.36 |
| H2-K1        | 0.97 | 1.54 | 0.29 | 0.38 |
| Slc24a6      | 0.29 | 0.25 | 0.29 | 0.26 |
| Cyp4v3       | 0.26 | 0.36 | 0.29 | 0.48 |
| Fbln7        | 0.12 | 0.10 | 0.29 | 0.30 |
| Inpp1        | 1.15 | 1.11 | 0.29 | 0.27 |
| Ryr2         | 2.35 | 2.48 | 0.29 | 0.31 |
| Gna15        | 0.21 | 0.17 | 0.29 | 0.26 |
| Myo5c        | 0.05 | 0.06 | 0.28 | 0.40 |
| Stap2        | 0.08 | 0.19 | 0.28 | 1.19 |
| Ppp1r18      | 0.58 | 0.52 | 0.28 | 0.27 |
| Sifn5        | 0.17 | 0.21 | 0.28 | 0.40 |
| Rxfp1        | 0.16 | 0.24 | 0.28 | 0.35 |
| Fbxo32       | 0.61 | 0.62 | 0.28 | 0.31 |
| Hist2h3c2    | 0.28 | 0.22 | 0.28 | 0.24 |
| Dnase1l2     | 0.19 | 0.11 | 0.28 | 0.18 |
| Kcng4        | 0.18 | 0.21 | 0.28 | 0.30 |
| Rell1        | 0.42 | 0.52 | 0.28 | 0.38 |
| Col16a1      | 0.18 | 0.31 | 0.28 | 0.56 |
| Cmtm3        | 0.99 | 1.19 | 0.28 | 0.32 |
| Elovl2       | 0.47 | 0.44 | 0.28 | 0.29 |
| Ccdc162      | 0.17 | 0.15 | 0.28 | 0.26 |
| Kif1c        | 2.37 | 2.53 | 0.28 | 0.31 |
| Flna         | 0.81 | 0.89 | 0.28 | 0.33 |
| Nhs1         | 0.66 | 0.75 | 0.28 | 0.29 |
| Lad1         | 0.22 | 0.16 | 0.28 | 0.21 |
| Odf4         | 0.16 | 0.12 | 0.28 | 0.24 |
| Enpp3        | 0.07 | 0.08 | 0.28 | 0.43 |
| Chat         | 1.14 | 0.85 | 0.28 | 0.33 |
| Col6a3       | 0.12 | 0.13 | 0.28 | 0.29 |
| Uba7         | 0.08 | 0.07 | 0.28 | 0.29 |
| Nkd1         | 1.28 | 1.46 | 0.28 | 0.33 |
| Gm14327      | 2.18 | 2.76 | 0.28 | 0.42 |
| Gad1         | 0.06 | 0.06 | 0.28 | 0.38 |
| Kdr          | 0.10 | 0.17 | 0.28 | 0.49 |
| E330013P04Ri | 0.06 | 0.03 | 0.28 | 0.17 |
| Nfe2l3       | 0.50 | 0.50 | 0.28 | 0.30 |
| Ccdc69       | 0.07 | 0.12 | 0.28 | 0.38 |
| Slc44a1      | 4.06 | 5.16 | 0.28 | 0.30 |
| Acadl        | 4.71 | 6.43 | 0.28 | 0.37 |
| 1700063D05R  | 1.21 | 1.43 | 0.28 | 0.37 |
| Slco1c1      | 0.41 | 0.99 | 0.28 | 0.70 |
| Trim59       | 3.52 | 3.69 | 0.28 | 0.28 |
| Hist1h1c     | 3.46 | 2.74 | 0.28 | 0.23 |
| Usp43        | 0.07 | 0.08 | 0.28 | 0.30 |
| Stxbp2       | 0.76 | 0.87 | 0.28 | 0.33 |
| Slc7a6       | 1.54 | 2.20 | 0.28 | 0.42 |
| 0610040J01Ri | 0.33 | 0.26 | 0.28 | 0.23 |
| Ifit3        | 1.04 | 1.01 | 0.28 | 0.23 |
| Necap2       | 3.18 | 3.52 | 0.28 | 0.30 |
| Ephb3        | 0.28 | 0.34 | 0.28 | 0.37 |
| Krt15        | 0.16 | 0.10 | 0.28 | 0.22 |
| Cryaa        | 0.06 | 0.05 | 0.28 | 0.23 |
| Prdm6        | 0.05 | 0.05 | 0.28 | 0.16 |
| Alas2        | 0.16 | 0.26 | 0.28 | 0.59 |

|             |       |       |      |      |
|-------------|-------|-------|------|------|
| Glul        | 81.50 | 87.41 | 0.28 | 0.29 |
| Trim30d     | 0.15  | 0.14  | 0.28 | 0.27 |
| Boc         | 0.19  | 0.19  | 0.28 | 0.30 |
| Rhbdl2      | 0.14  | 0.09  | 0.28 | 0.23 |
| Klk1b22     | 0.14  | 0.08  | 0.28 | 0.38 |
| Spata17     | 0.14  | 0.06  | 0.28 | 0.13 |
| Arap2       | 1.69  | 1.95  | 0.28 | 0.32 |
| Fblim1      | 0.13  | 0.19  | 0.28 | 0.42 |
| Pole2       | 0.07  | 0.09  | 0.28 | 0.51 |
| Hs3st3b1    | 0.05  | 0.08  | 0.28 | 0.34 |
| Fam163a     | 0.40  | 0.53  | 0.28 | 0.36 |
| Bmp4        | 0.19  | 0.16  | 0.28 | 0.16 |
| Cdkn2c      | 0.18  | 0.23  | 0.28 | 0.35 |
| B930003M22F | 0.89  | 0.41  | 0.28 | 0.14 |
| Fbn2        | 0.16  | 0.15  | 0.28 | 0.29 |
| Mpz1        | 1.60  | 1.89  | 0.27 | 0.33 |
| Foxc2       | 0.11  | 0.10  | 0.27 | 0.14 |
| Bcl2l12     | 0.26  | 0.27  | 0.27 | 0.31 |
| Abhd4       | 6.59  | 6.88  | 0.27 | 0.29 |
| Islr        | 0.37  | 0.44  | 0.27 | 0.33 |
| Depdc1b     | 0.07  | 0.09  | 0.27 | 0.62 |
| Clic6       | 0.94  | 1.09  | 0.27 | 0.33 |
| Smtn        | 0.26  | 0.21  | 0.27 | 0.27 |
| 5730559C18R | 0.34  | 0.33  | 0.27 | 0.32 |
| Snx33       | 0.67  | 0.77  | 0.27 | 0.34 |
| Egr2        | 0.06  | 0.08  | 0.27 | 0.44 |
| Caskin2     | 1.02  | 1.10  | 0.27 | 0.30 |
| A730037C10R | 0.10  | 0.09  | 0.27 | 0.35 |
| Mro         | 2.06  | 2.21  | 0.27 | 0.30 |
| Pxn         | 1.17  | 1.28  | 0.27 | 0.31 |
| Myoc        | 0.28  | 0.51  | 0.27 | 0.41 |
| Evc         | 0.24  | 0.30  | 0.27 | 0.35 |
| Arhgap31    | 0.46  | 0.59  | 0.27 | 0.38 |
| Nek5        | 0.13  | 0.12  | 0.27 | 0.26 |
| Fxyd5       | 0.35  | 0.70  | 0.27 | 0.47 |
| Nbeal1      | 0.68  | 0.79  | 0.27 | 0.37 |
| Clic3       | 0.11  | 0.15  | 0.27 | 0.37 |
| Ovgp1       | 0.46  | 0.39  | 0.27 | 0.28 |
| Nkx6-2      | 7.65  | 7.21  | 0.27 | 0.26 |
| 1700028P14R | 0.51  | 0.64  | 0.27 | 0.35 |
| Ddx26b      | 2.30  | 2.55  | 0.27 | 0.31 |
| Vtn         | 1.18  | 1.84  | 0.27 | 0.38 |
| Gas2l2      | 0.09  | 0.09  | 0.27 | 0.27 |
| Lamb2       | 0.18  | 0.30  | 0.27 | 0.42 |
| Lrrk1       | 0.09  | 0.07  | 0.27 | 0.20 |
| Podn        | 0.03  | 0.05  | 0.27 | 0.27 |
| Gal3st1     | 2.67  | 2.82  | 0.27 | 0.28 |
| Tfeb        | 1.23  | 1.28  | 0.27 | 0.29 |
| Wipf1       | 1.01  | 0.96  | 0.27 | 0.27 |
| Csmd1       | 0.78  | 0.95  | 0.27 | 0.34 |
| Gm10714     | 0.34  | 0.23  | 0.27 | 0.22 |
| Fat3        | 1.01  | 1.01  | 0.27 | 0.30 |
| Zfyve21     | 3.59  | 3.84  | 0.27 | 0.28 |
| Car14       | 1.29  | 1.54  | 0.27 | 0.28 |
| Mgl2        | 0.04  | 0.04  | 0.27 | 0.21 |
| Fxyd1       | 6.60  | 8.03  | 0.27 | 0.33 |
| Gpd1        | 1.77  | 2.17  | 0.27 | 0.30 |
| Adamts3     | 0.24  | 0.25  | 0.27 | 0.36 |
| She         | 0.06  | 0.13  | 0.27 | 0.54 |
| Tmem123     | 0.88  | 1.12  | 0.27 | 0.33 |
| Igj         | 0.12  | 0.17  | 0.27 | 0.38 |
| Chrna2      | 0.06  | 0.04  | 0.27 | 0.30 |
| E130203B14R | 0.20  | 0.15  | 0.27 | 0.22 |
| Runx1       | 0.06  | 0.08  | 0.27 | 0.31 |
| Olfml3      | 0.48  | 0.39  | 0.27 | 0.25 |

|             |       |       |      |      |
|-------------|-------|-------|------|------|
| Ppap2b      | 5.71  | 7.65  | 0.27 | 0.34 |
| Tns3        | 1.86  | 2.02  | 0.27 | 0.28 |
| Foxb2       | 0.39  | 0.62  | 0.27 | 0.37 |
| Col11a2     | 0.10  | 0.16  | 0.27 | 0.43 |
| Cnksr3      | 0.44  | 0.46  | 0.27 | 0.29 |
| AI464131    | 0.48  | 0.66  | 0.27 | 0.33 |
| Prrg1       | 0.79  | 0.89  | 0.27 | 0.31 |
| AI848285    | 0.19  | 0.25  | 0.27 | 0.36 |
| Eln         | 0.16  | 0.26  | 0.27 | 0.49 |
| Adam17      | 0.63  | 0.82  | 0.27 | 0.35 |
| C330024D21R | 0.15  | 0.25  | 0.27 | 0.47 |
| Gpr37       | 3.39  | 4.69  | 0.27 | 0.30 |
| Ccdc141     | 0.42  | 0.47  | 0.27 | 0.34 |
| Arhgef26    | 1.57  | 1.80  | 0.27 | 0.30 |
| Gpm6b       | 14.95 | 19.14 | 0.26 | 0.33 |
| Gbp2        | 0.16  | 0.23  | 0.26 | 0.41 |
| Msx1as      | 0.24  | 0.18  | 0.26 | 0.22 |
| Ces1d       | 0.12  | 0.11  | 0.26 | 0.32 |
| Fgfr2       | 1.74  | 2.08  | 0.26 | 0.34 |
| Slc11a1     | 0.14  | 0.23  | 0.26 | 0.39 |
| Serinc5     | 1.94  | 2.30  | 0.26 | 0.31 |
| Serpina9    | 0.11  | 0.17  | 0.26 | 0.61 |
| Nfatc4      | 0.10  | 0.05  | 0.26 | 0.17 |
| Slc5a11     | 0.12  | 0.15  | 0.26 | 0.27 |
| Gm14005     | 0.18  | 0.19  | 0.26 | 0.75 |
| Nphs2       | 0.03  | 0.03  | 0.26 | 0.11 |
| Emp1        | 0.17  | 0.11  | 0.26 | 0.24 |
| Cd84        | 0.26  | 0.37  | 0.26 | 0.40 |
| Foxl2       | 0.06  | 0.03  | 0.26 | 0.13 |
| Tmem181c-ps | 2.97  | 3.45  | 0.26 | 0.34 |
| Pon2        | 1.76  | 2.31  | 0.26 | 0.33 |
| Tril        | 1.12  | 1.32  | 0.26 | 0.31 |
| Hapln1      | 0.20  | 0.32  | 0.26 | 0.38 |
| Gab1        | 2.50  | 2.95  | 0.26 | 0.32 |
| Proca1      | 0.71  | 0.71  | 0.26 | 0.26 |
| Col1a2      | 0.18  | 0.23  | 0.26 | 0.29 |
| Pirt        | 0.08  | 0.13  | 0.26 | 0.41 |
| Tlcd1       | 1.46  | 1.63  | 0.26 | 0.26 |
| Hlx         | 0.03  | 0.01  | 0.26 | 0.10 |
| Phactr4     | 0.62  | 0.65  | 0.26 | 0.28 |
| Reck        | 0.41  | 0.48  | 0.26 | 0.33 |
| Ccdc80      | 0.17  | 0.19  | 0.26 | 0.25 |
| Tspo        | 1.07  | 1.44  | 0.26 | 0.36 |
| Tmem37      | 0.08  | 0.06  | 0.26 | 0.21 |
| Mitf        | 0.43  | 0.57  | 0.26 | 0.38 |
| Cd300a      | 0.22  | 0.27  | 0.26 | 0.35 |
| Ppp1r36     | 0.29  | 0.15  | 0.26 | 0.16 |
| Hist2h2be   | 0.92  | 0.85  | 0.26 | 0.27 |
| Angptl4     | 0.25  | 0.38  | 0.26 | 0.40 |
| Pclo        | 2.47  | 2.97  | 0.26 | 0.32 |
| Akna        | 0.19  | 0.19  | 0.26 | 0.28 |
| Pdzk1ip1    | 0.09  | 0.18  | 0.26 | 0.55 |
| Zbtb7b      | 0.97  | 0.95  | 0.26 | 0.24 |
| Nbl1        | 2.98  | 3.29  | 0.26 | 0.23 |
| Itpr2       | 0.23  | 0.29  | 0.26 | 0.33 |
| Tjp2        | 1.80  | 1.77  | 0.26 | 0.27 |
| Fermt3      | 0.24  | 0.27  | 0.26 | 0.31 |
| Lyn         | 0.24  | 0.33  | 0.26 | 0.34 |
| Cxadr       | 1.86  | 2.38  | 0.26 | 0.37 |
| Gpr4        | 0.34  | 0.50  | 0.26 | 0.37 |
| Sptlc3      | 0.05  | 0.04  | 0.26 | 0.51 |
| Col3a1      | 0.04  | 0.03  | 0.26 | 0.19 |
| Nkx2-9      | 0.28  | 0.32  | 0.26 | 0.34 |
| Rad51l1     | 0.06  | 0.08  | 0.26 | 0.37 |
| Arhgap29    | 0.45  | 0.53  | 0.26 | 0.30 |

|              |      |      |      |      |
|--------------|------|------|------|------|
| Slc28a3      | 0.07 | 0.07 | 0.25 | 0.30 |
| Bbox1        | 0.91 | 0.95 | 0.25 | 0.26 |
| Mtmt10       | 1.21 | 1.56 | 0.25 | 0.32 |
| Ly6c1        | 0.81 | 2.34 | 0.25 | 0.84 |
| Capg         | 0.43 | 0.43 | 0.25 | 0.23 |
| Sh3pxd2b     | 0.79 | 0.78 | 0.25 | 0.24 |
| Mrv1         | 0.12 | 0.15 | 0.25 | 0.27 |
| 1700020114Ri | 4.80 | 5.49 | 0.25 | 0.29 |
| Tnfrsf23     | 0.06 | 0.10 | 0.25 | 0.47 |
| Gm11992      | 0.46 | 0.42 | 0.25 | 0.26 |
| Pxdn         | 0.94 | 1.21 | 0.25 | 0.36 |
| Malt1        | 0.65 | 0.71 | 0.25 | 0.30 |
| Polq         | 0.08 | 0.11 | 0.25 | 0.36 |
| Crip1        | 2.10 | 2.33 | 0.25 | 0.24 |
| Cpn1         | 0.11 | 0.14 | 0.25 | 0.29 |
| Gpr98        | 0.13 | 0.12 | 0.25 | 0.23 |
| Egfr         | 0.10 | 0.10 | 0.25 | 0.26 |
| B230209K01R  | 0.11 | 0.12 | 0.25 | 0.23 |
| Bche         | 0.24 | 0.30 | 0.25 | 0.32 |
| E230008N13R  | 0.10 | 0.08 | 0.25 | 0.26 |
| 4933407K13R  | 0.22 | 0.30 | 0.25 | 0.31 |
| F3           | 2.04 | 2.51 | 0.25 | 0.30 |
| Slc6a18      | 0.04 | 0.05 | 0.25 | 0.42 |
| Lrp1b        | 0.97 | 1.02 | 0.25 | 0.29 |
| Slc16a12     | 0.09 | 0.11 | 0.25 | 0.27 |
| Acap2        | 2.85 | 3.29 | 0.25 | 0.29 |
| Adam1a       | 0.57 | 0.66 | 0.25 | 0.33 |
| Megf10       | 0.50 | 0.64 | 0.25 | 0.32 |
| Igfbp2       | 0.65 | 0.86 | 0.25 | 0.22 |
| Tnfrsf1a     | 0.46 | 0.48 | 0.25 | 0.29 |
| Cep110       | 0.47 | 0.51 | 0.25 | 0.28 |
| Entpd2       | 0.56 | 0.79 | 0.25 | 0.27 |
| Carhsp1      | 5.82 | 6.06 | 0.25 | 0.25 |
| Bmpr1b       | 0.32 | 0.41 | 0.25 | 0.31 |
| Pls1         | 1.28 | 1.43 | 0.25 | 0.27 |
| Rassf9       | 0.12 | 0.07 | 0.25 | 0.17 |
| Pcdh15       | 1.07 | 1.22 | 0.25 | 0.30 |
| Tcf7l2       | 5.43 | 5.13 | 0.25 | 0.25 |
| Chrn1        | 0.12 | 0.20 | 0.25 | 0.46 |
| Akap13       | 0.64 | 0.68 | 0.25 | 0.27 |
| Dnajb13      | 0.39 | 0.44 | 0.25 | 0.27 |
| E130102H24R  | 1.92 | 2.05 | 0.25 | 0.27 |
| Slc38a11     | 0.10 | 0.30 | 0.25 | 1.02 |
| Etv1         | 3.36 | 3.27 | 0.25 | 0.26 |
| Ddit4l       | 0.31 | 0.29 | 0.25 | 0.28 |
| Nrarp        | 4.57 | 4.49 | 0.25 | 0.27 |
| Impg2        | 0.09 | 0.12 | 0.25 | 0.33 |
| Prkcd        | 2.92 | 2.99 | 0.25 | 0.27 |
| 4933408B17R  | 0.07 | 0.03 | 0.25 | 0.14 |
| Jub          | 0.16 | 0.16 | 0.25 | 0.32 |
| Rcn3         | 0.21 | 0.39 | 0.25 | 0.44 |
| 5033411D12R  | 0.05 | 0.12 | 0.25 | 0.54 |
| Parp14       | 0.05 | 0.04 | 0.25 | 0.20 |
| Itga9        | 0.19 | 0.23 | 0.25 | 0.33 |
| Ipw          | 8.83 | 8.71 | 0.25 | 0.33 |
| Pigm         | 0.64 | 0.75 | 0.25 | 0.33 |
| Zbed6        | 1.49 | 1.78 | 0.25 | 0.31 |
| Fcgrt        | 0.38 | 0.65 | 0.25 | 0.41 |
| Nat1         | 0.25 | 0.25 | 0.25 | 0.24 |
| Slco1a4      | 0.34 | 1.19 | 0.25 | 0.86 |
| Mcm3         | 0.21 | 0.19 | 0.25 | 0.22 |
| Hes1         | 1.35 | 1.42 | 0.24 | 0.26 |
| Tsku         | 0.10 | 0.12 | 0.24 | 0.31 |
| Vmn2r-ps129  | 0.18 | 0.34 | 0.24 | 0.42 |
| Mybl2        | 0.07 | 0.08 | 0.24 | 0.31 |

|              |       |        |      |      |
|--------------|-------|--------|------|------|
| Dsg1c        | 0.04  | 0.02   | 0.24 | 0.15 |
| Nox4         | 0.18  | 0.21   | 0.24 | 0.29 |
| 1190002H23R  | 3.23  | 3.61   | 0.24 | 0.23 |
| Myo1e        | 0.39  | 0.50   | 0.24 | 0.29 |
| Aebp1        | 0.27  | 0.38   | 0.24 | 0.24 |
| Ccdc122      | 0.25  | 0.36   | 0.24 | 0.28 |
| Rax          | 0.40  | 0.30   | 0.24 | 0.16 |
| 1700094D03R  | 1.22  | 1.18   | 0.24 | 0.27 |
| Igsf11       | 0.63  | 0.76   | 0.24 | 0.24 |
| Sifn2        | 0.07  | 0.05   | 0.24 | 0.15 |
| Tmem194b     | 0.54  | 0.58   | 0.24 | 0.30 |
| Il10ra       | 0.18  | 0.24   | 0.24 | 0.29 |
| Gabrd        | 0.36  | 0.41   | 0.24 | 0.28 |
| 4930473A06R  | 0.18  | 0.21   | 0.24 | 0.36 |
| Igsf9b       | 0.20  | 0.20   | 0.24 | 0.23 |
| Tgm4         | 0.12  | 0.16   | 0.24 | 0.35 |
| Mag          | 7.76  | 10.83  | 0.24 | 0.31 |
| Sox7         | 0.07  | 0.07   | 0.24 | 0.29 |
| Finc         | 0.04  | 0.05   | 0.24 | 0.30 |
| Lmod1        | 0.04  | 0.03   | 0.24 | 0.18 |
| Fbn1         | 0.36  | 0.42   | 0.24 | 0.30 |
| C230035I16Ri | 0.24  | 0.26   | 0.24 | 0.31 |
| Ccdc33       | 0.17  | 0.20   | 0.24 | 0.40 |
| Lin28b       | 0.62  | 0.57   | 0.24 | 0.23 |
| Il1a         | 0.13  | 0.13   | 0.24 | 0.22 |
| Nes          | 0.11  | 0.21   | 0.24 | 0.51 |
| 9030625A04R  | 0.27  | 0.31   | 0.24 | 0.24 |
| Mob3b        | 0.29  | 0.35   | 0.24 | 0.27 |
| Crygn        | 0.46  | 0.46   | 0.24 | 0.30 |
| Jam2         | 1.09  | 1.22   | 0.24 | 0.27 |
| Acot5        | 0.11  | 0.11   | 0.24 | 0.21 |
| Fmo5         | 0.17  | 0.19   | 0.24 | 0.29 |
| Dbi          | 97.48 | 100.95 | 0.24 | 0.24 |
| 2700070H01R  | 0.13  | 0.13   | 0.24 | 0.27 |
| Des          | 0.06  | 0.11   | 0.24 | 0.41 |
| Tcf7l1       | 0.35  | 0.29   | 0.24 | 0.19 |
| Ncf1         | 0.60  | 0.65   | 0.24 | 0.27 |
| Slc7a11      | 0.72  | 1.15   | 0.24 | 0.32 |
| Syde1        | 0.61  | 0.64   | 0.24 | 0.27 |
| Gata2        | 0.13  | 0.12   | 0.24 | 0.26 |
| Insc         | 0.77  | 0.80   | 0.24 | 0.25 |
| Rhoh         | 0.04  | 0.06   | 0.24 | 0.36 |
| Scara3       | 0.23  | 0.46   | 0.24 | 0.43 |
| Fpr1         | 0.10  | 0.07   | 0.24 | 0.12 |
| Peg12        | 0.05  | 0.04   | 0.24 | 0.36 |
| Rhog         | 7.13  | 6.99   | 0.24 | 0.23 |
| Tnfrsf18     | 0.68  | 0.60   | 0.24 | 0.25 |
| Itgb5        | 0.76  | 1.00   | 0.24 | 0.28 |
| Rgl3         | 0.21  | 0.22   | 0.24 | 0.27 |
| Tmem52       | 0.13  | 0.07   | 0.24 | 0.15 |
| Ly6g6f       | 0.24  | 0.39   | 0.24 | 0.35 |
| 4930523C07Ri | 0.06  | 0.09   | 0.24 | 0.35 |
| MyI9         | 1.98  | 2.34   | 0.23 | 0.34 |
| Wdr16        | 0.38  | 0.49   | 0.23 | 0.36 |
| Rhcg         | 0.14  | 0.16   | 0.23 | 0.28 |
| Hdc          | 2.97  | 3.41   | 0.23 | 0.24 |
| Dmkn         | 0.97  | 1.19   | 0.23 | 0.43 |
| Magt1        | 0.79  | 1.13   | 0.23 | 0.35 |
| 6530402F18Ri | 0.20  | 0.27   | 0.23 | 0.33 |
| Nexn         | 0.50  | 0.53   | 0.23 | 0.27 |
| Hpn          | 0.02  | 0.05   | 0.23 | 0.29 |
| Ccdc8        | 0.22  | 0.21   | 0.23 | 0.19 |
| 2010110P09Ri | 0.10  | 0.13   | 0.23 | 0.37 |
| Dynlrb2      | 3.00  | 2.59   | 0.23 | 0.20 |
| Cnp          | 51.19 | 57.56  | 0.23 | 0.25 |

|              |      |      |      |      |
|--------------|------|------|------|------|
| Caps2        | 0.09 | 0.10 | 0.23 | 0.39 |
| Bmp7         | 0.42 | 0.48 | 0.23 | 0.25 |
| Col23a1      | 0.23 | 0.31 | 0.23 | 0.31 |
| Nphp3        | 0.61 | 0.57 | 0.23 | 0.22 |
| Sardh        | 0.36 | 0.41 | 0.23 | 0.26 |
| Plekhh1      | 1.11 | 1.33 | 0.23 | 0.28 |
| Cyp2j6       | 0.87 | 1.14 | 0.23 | 0.31 |
| Cubn         | 0.04 | 0.06 | 0.23 | 0.40 |
| Ii18bp       | 0.27 | 0.29 | 0.23 | 0.24 |
| Cysltr1      | 0.02 | 0.03 | 0.23 | 0.19 |
| Gm4532       | 0.44 | 0.43 | 0.23 | 0.22 |
| Myh15        | 0.04 | 0.03 | 0.23 | 0.20 |
| Rcsd1        | 0.40 | 0.29 | 0.23 | 0.14 |
| Notch3       | 0.23 | 0.34 | 0.23 | 0.34 |
| Foxd1        | 0.30 | 0.35 | 0.23 | 0.24 |
| Gpt          | 1.05 | 1.03 | 0.23 | 0.22 |
| Myo6         | 2.47 | 2.77 | 0.23 | 0.26 |
| Rlbp1        | 0.96 | 1.09 | 0.23 | 0.28 |
| Sned1        | 0.13 | 0.15 | 0.23 | 0.22 |
| Ak7          | 0.62 | 0.61 | 0.23 | 0.29 |
| Cyp1b1       | 0.07 | 0.09 | 0.23 | 0.32 |
| Plag1        | 0.11 | 0.17 | 0.23 | 0.40 |
| Crip3        | 0.28 | 0.23 | 0.23 | 0.26 |
| 9330117O12   | 0.48 | 0.50 | 0.23 | 0.26 |
| Sgk3         | 0.40 | 0.39 | 0.23 | 0.26 |
| Psg28        | 0.02 | 0.04 | 0.23 | 0.25 |
| Hc           | 0.03 | 0.05 | 0.23 | 0.29 |
| Pde8a        | 1.38 | 1.56 | 0.23 | 0.31 |
| Tia1         | 3.71 | 4.50 | 0.23 | 0.31 |
| Icosl        | 0.17 | 0.20 | 0.23 | 0.21 |
| Asgr1        | 0.17 | 0.10 | 0.23 | 0.10 |
| Ramp1        | 1.69 | 1.94 | 0.23 | 0.24 |
| Ptgr1        | 0.17 | 0.16 | 0.23 | 0.26 |
| C1ql1        | 1.45 | 1.53 | 0.23 | 0.24 |
| Itpripl1     | 0.07 | 0.07 | 0.23 | 0.34 |
| Gm10863      | 0.15 | 0.09 | 0.23 | 0.19 |
| Ngf          | 0.10 | 0.21 | 0.23 | 0.40 |
| Cdk19        | 1.88 | 2.03 | 0.23 | 0.23 |
| Gsdmd        | 0.18 | 0.18 | 0.23 | 0.26 |
| Ii20rb       | 0.04 | 0.04 | 0.23 | 0.29 |
| Parp3        | 0.33 | 0.26 | 0.23 | 0.18 |
| Alx3         | 0.05 | 0.04 | 0.23 | 0.12 |
| 2810405F15Ri | 0.07 | 0.05 | 0.23 | 0.19 |
| A430107O13R  | 0.11 | 0.12 | 0.23 | 0.29 |
| Isg20        | 0.12 | 0.16 | 0.23 | 0.42 |
| Gpx8         | 0.34 | 0.45 | 0.23 | 0.24 |
| 4930519G04R  | 0.12 | 0.18 | 0.22 | 0.41 |
| Uaca         | 0.33 | 0.32 | 0.22 | 0.21 |
| Lrrc36       | 0.31 | 0.30 | 0.22 | 0.30 |
| Txnip        | 1.26 | 1.55 | 0.22 | 0.25 |
| A230001M10R  | 0.46 | 0.44 | 0.22 | 0.24 |
| Lbp          | 0.06 | 0.09 | 0.22 | 0.33 |
| Fasl         | 0.05 | 0.08 | 0.22 | 0.36 |
| Stard8       | 0.19 | 0.19 | 0.22 | 0.24 |
| Irak3        | 0.06 | 0.12 | 0.22 | 0.42 |
| Ankrd23      | 0.39 | 0.38 | 0.22 | 0.22 |
| Abca6        | 0.06 | 0.07 | 0.22 | 0.24 |
| Ldirad3      | 0.46 | 0.67 | 0.22 | 0.30 |
| Sla          | 0.24 | 0.33 | 0.22 | 0.28 |
| F11r         | 0.25 | 0.43 | 0.22 | 0.44 |
| Cbs          | 1.71 | 1.77 | 0.22 | 0.23 |
| Cldn14       | 0.15 | 0.18 | 0.22 | 0.26 |
| Hsd11b1      | 0.40 | 0.56 | 0.22 | 0.22 |
| Stxbp3a      | 2.44 | 3.05 | 0.22 | 0.29 |
| Fras1        | 0.33 | 0.34 | 0.22 | 0.22 |

|              |       |       |      |      |
|--------------|-------|-------|------|------|
| Prima1       | 0.90  | 0.96  | 0.22 | 0.30 |
| Ms4a6b       | 0.02  | 0.02  | 0.22 | 0.13 |
| Il1rap       | 0.72  | 1.02  | 0.22 | 0.27 |
| 9130014G24R  | 0.08  | 0.05  | 0.22 | 0.16 |
| Chdh         | 0.29  | 0.27  | 0.22 | 0.20 |
| Plekha2      | 0.60  | 0.57  | 0.22 | 0.21 |
| Gata3        | 0.03  | 0.05  | 0.22 | 0.43 |
| Mdn1         | 2.16  | 2.12  | 0.22 | 0.23 |
| Cdk5rap2     | 0.52  | 0.52  | 0.22 | 0.24 |
| Cmtm5        | 8.01  | 8.58  | 0.22 | 0.21 |
| Tspan15      | 0.72  | 0.89  | 0.22 | 0.27 |
| Pld1         | 0.55  | 0.63  | 0.22 | 0.26 |
| Casq2        | 0.14  | 0.28  | 0.22 | 0.43 |
| Ndrp2        | 48.73 | 52.65 | 0.22 | 0.23 |
| Gm13293      | 0.50  | 0.50  | 0.22 | 0.25 |
| Triobp       | 0.64  | 0.60  | 0.22 | 0.22 |
| Foxa2        | 0.06  | 0.06  | 0.22 | 0.30 |
| 6530418L21Ri | 0.69  | 0.77  | 0.22 | 0.22 |
| Foxj1        | 1.37  | 1.53  | 0.22 | 0.23 |
| Adamts20     | 0.38  | 0.38  | 0.22 | 0.26 |
| Fam38b       | 0.05  | 0.03  | 0.22 | 0.16 |
| Pmp22        | 1.82  | 2.46  | 0.22 | 0.26 |
| Galnt6       | 0.47  | 0.56  | 0.22 | 0.24 |
| Fzd10        | 0.08  | 0.12  | 0.22 | 0.33 |
| Emid2        | 0.36  | 0.41  | 0.22 | 0.23 |
| Cobll1       | 0.43  | 0.38  | 0.22 | 0.19 |
| Cpt1a        | 0.72  | 0.84  | 0.22 | 0.26 |
| Aox1         | 0.16  | 0.19  | 0.22 | 0.24 |
| Fam176a      | 0.69  | 0.94  | 0.22 | 0.31 |
| Plcb3        | 0.55  | 0.63  | 0.22 | 0.26 |
| Trim29       | 0.02  | 0.03  | 0.22 | 0.22 |
| Tshb         | 0.34  | 0.37  | 0.22 | 0.38 |
| Dnahc11      | 0.05  | 0.05  | 0.22 | 0.24 |
| Gpr160       | 0.06  | 0.03  | 0.22 | 0.15 |
| Crym         | 2.49  | 2.22  | 0.22 | 0.23 |
| Otx1         | 0.30  | 0.31  | 0.22 | 0.19 |
| Mmp14        | 0.34  | 0.34  | 0.22 | 0.27 |
| Ets1         | 0.20  | 0.32  | 0.22 | 0.41 |
| Osr1         | 0.12  | 0.16  | 0.22 | 0.19 |
| Krt8         | 0.10  | 0.08  | 0.22 | 0.22 |
| Itih5        | 0.24  | 0.40  | 0.22 | 0.33 |
| Nat8         | 0.27  | 0.20  | 0.22 | 0.16 |
| Foxb1        | 0.60  | 0.61  | 0.21 | 0.20 |
| A630033H20R  | 0.05  | 0.04  | 0.21 | 0.22 |
| Rbms2        | 0.42  | 0.50  | 0.21 | 0.24 |
| Cd33         | 0.17  | 0.15  | 0.21 | 0.18 |
| Gm12530      | 0.04  | 0.03  | 0.21 | 0.19 |
| Cxcr2        | 0.28  | 0.31  | 0.21 | 0.26 |
| Ccdc102a     | 0.17  | 0.11  | 0.21 | 0.16 |
| Cmi2         | 0.03  | 0.05  | 0.21 | 0.30 |
| Bcl6b        | 0.05  | 0.05  | 0.21 | 0.29 |
| Gm5464       | 0.10  | 0.10  | 0.21 | 0.29 |
| Cyp2d22      | 0.47  | 0.52  | 0.21 | 0.21 |
| Anln         | 2.31  | 2.74  | 0.21 | 0.23 |
| Tcf7         | 0.13  | 0.15  | 0.21 | 0.26 |
| Slc1a2       | 3.86  | 5.47  | 0.21 | 0.28 |
| D630039A03R  | 0.06  | 0.05  | 0.21 | 0.28 |
| Zfp366       | 0.03  | 0.09  | 0.21 | 0.62 |
| Adamts6      | 0.22  | 0.30  | 0.21 | 0.33 |
| Il7r         | 0.03  | 0.03  | 0.21 | 0.17 |
| Sypl2        | 0.03  | 0.04  | 0.21 | 0.21 |
| Arpc1b       | 1.89  | 1.76  | 0.21 | 0.19 |
| Mlxipl       | 0.06  | 0.05  | 0.21 | 0.21 |
| Lmcd1        | 0.38  | 0.42  | 0.21 | 0.26 |
| Ppp1r1b      | 5.59  | 4.04  | 0.21 | 0.22 |

|              |       |       |      |      |
|--------------|-------|-------|------|------|
| Ttpa         | 0.35  | 0.34  | 0.21 | 0.21 |
| Mt1          | 72.42 | 68.14 | 0.21 | 0.20 |
| Aldh1l1      | 2.12  | 2.22  | 0.21 | 0.24 |
| Fam46c       | 0.09  | 0.07  | 0.21 | 0.22 |
| Pacsin3      | 1.98  | 2.12  | 0.21 | 0.21 |
| Slc25a18     | 9.17  | 9.44  | 0.21 | 0.22 |
| A230057D06R  | 0.76  | 0.95  | 0.21 | 0.25 |
| Slc39a8      | 0.08  | 0.11  | 0.21 | 0.30 |
| Zeb2         | 1.24  | 1.47  | 0.21 | 0.25 |
| Atp13a5      | 0.15  | 0.29  | 0.21 | 0.36 |
| Micalcl      | 0.12  | 0.15  | 0.21 | 0.23 |
| Kif15        | 0.10  | 0.14  | 0.21 | 0.37 |
| Osgin1       | 0.04  | 0.04  | 0.21 | 0.12 |
| Cyth4        | 0.54  | 0.56  | 0.21 | 0.22 |
| Tmem100      | 1.10  | 1.26  | 0.21 | 0.24 |
| Ccdc3        | 0.14  | 0.26  | 0.21 | 0.18 |
| Cecr2        | 0.09  | 0.09  | 0.21 | 0.22 |
| Gm216        | 0.34  | 0.29  | 0.21 | 0.22 |
| Lrig3        | 0.11  | 0.13  | 0.21 | 0.23 |
| Lhx3         | 0.08  | 0.10  | 0.21 | 0.30 |
| Reep3        | 1.00  | 1.29  | 0.21 | 0.25 |
| Gm11627      | 0.78  | 1.54  | 0.21 | 0.48 |
| Slc4a4       | 2.08  | 2.80  | 0.21 | 0.26 |
| Cd14         | 0.13  | 0.07  | 0.21 | 0.13 |
| Chrna6       | 0.12  | 0.22  | 0.21 | 0.33 |
| Alox5        | 0.05  | 0.03  | 0.21 | 0.19 |
| Fgfr3        | 1.77  | 2.49  | 0.21 | 0.27 |
| Tbxas1       | 0.08  | 0.10  | 0.21 | 0.39 |
| Otx2         | 0.27  | 0.30  | 0.21 | 0.33 |
| Appl2        | 4.55  | 5.29  | 0.21 | 0.23 |
| Notch1       | 0.29  | 0.29  | 0.21 | 0.24 |
| Myh11        | 0.05  | 0.13  | 0.21 | 0.54 |
| Armc4        | 0.06  | 0.02  | 0.21 | 0.10 |
| Tec          | 0.16  | 0.20  | 0.21 | 0.26 |
| Lrp4         | 0.16  | 0.20  | 0.21 | 0.25 |
| Postn        | 0.08  | 0.13  | 0.21 | 0.38 |
| Adamts9      | 0.17  | 0.21  | 0.21 | 0.28 |
| Lect1        | 0.13  | 0.14  | 0.21 | 0.19 |
| Aif1         | 0.79  | 0.70  | 0.21 | 0.15 |
| Lrp2         | 0.04  | 0.04  | 0.21 | 0.22 |
| Sphk1        | 0.16  | 0.28  | 0.21 | 0.27 |
| Homer3       | 0.34  | 0.37  | 0.21 | 0.17 |
| Slc13a3      | 0.40  | 0.66  | 0.21 | 0.31 |
| Prrx2        | 0.10  | 0.07  | 0.21 | 0.09 |
| Ppef2        | 0.14  | 0.30  | 0.20 | 0.66 |
| Cd97         | 0.14  | 0.24  | 0.20 | 0.41 |
| Cryba4       | 0.09  | 0.09  | 0.20 | 0.19 |
| Cav1         | 0.49  | 0.68  | 0.20 | 0.26 |
| A2m          | 0.11  | 0.14  | 0.20 | 0.29 |
| Slc2a4rg-ps  | 0.18  | 0.20  | 0.20 | 0.24 |
| Nanos2       | 0.11  | 0.16  | 0.20 | 0.33 |
| Foxf2        | 0.15  | 0.16  | 0.20 | 0.22 |
| Rnpc3        | 2.81  | 3.49  | 0.20 | 0.27 |
| Prrx1        | 0.46  | 0.61  | 0.20 | 0.26 |
| Ecm2         | 0.08  | 0.14  | 0.20 | 0.40 |
| Pxmp2        | 0.87  | 0.98  | 0.20 | 0.21 |
| 2810049E08Ri | 0.30  | 0.51  | 0.20 | 0.37 |
| Tet2         | 0.69  | 0.78  | 0.20 | 0.23 |
| Creb5        | 0.15  | 0.09  | 0.20 | 0.13 |
| Slc13a4      | 0.18  | 0.28  | 0.20 | 0.17 |
| Pglyrp1      | 0.13  | 0.46  | 0.20 | 0.63 |
| Itga5        | 0.03  | 0.04  | 0.20 | 0.40 |
| Fzd6         | 0.10  | 0.16  | 0.20 | 0.35 |
| Col6a1       | 0.08  | 0.14  | 0.20 | 0.33 |
| Ikbke        | 0.07  | 0.08  | 0.20 | 0.25 |



|              |      |      |      |      |
|--------------|------|------|------|------|
| Scd1         | 3.59 | 4.63 | 0.20 | 0.25 |
| Acss1        | 1.56 | 1.54 | 0.20 | 0.19 |
| Dusp11       | 2.59 | 3.13 | 0.20 | 0.26 |
| Zfp474       | 0.16 | 0.15 | 0.20 | 0.19 |
| Capn3        | 0.22 | 0.27 | 0.20 | 0.20 |
| Wwtr1        | 0.47 | 0.56 | 0.20 | 0.27 |
| Phyhd1       | 1.46 | 1.77 | 0.20 | 0.22 |
| Eif4ebp3     | 0.62 | 0.74 | 0.20 | 0.21 |
| Gucy2f       | 0.04 | 0.06 | 0.20 | 0.31 |
| Ghrl         | 0.27 | 0.66 | 0.20 | 0.53 |
| Kcne1l       | 0.74 | 0.76 | 0.20 | 0.20 |
| Wdr52        | 0.35 | 0.49 | 0.20 | 0.31 |
| Trim34a      | 0.09 | 0.08 | 0.20 | 0.29 |
| Cxcr4        | 0.08 | 0.06 | 0.20 | 0.22 |
| Traf1        | 0.20 | 0.22 | 0.20 | 0.22 |
| Id1          | 1.30 | 1.81 | 0.20 | 0.25 |
| Elf4         | 0.04 | 0.05 | 0.20 | 0.41 |
| Ppara        | 0.09 | 0.12 | 0.20 | 0.28 |
| Prelp        | 0.33 | 0.40 | 0.20 | 0.23 |
| Cdc42ep5     | 0.20 | 0.28 | 0.20 | 0.25 |
| Plekho2      | 0.91 | 0.89 | 0.20 | 0.21 |
| Morn3        | 0.20 | 0.10 | 0.20 | 0.14 |
| Tgm2         | 0.37 | 0.45 | 0.20 | 0.29 |
| Sox9         | 1.38 | 1.30 | 0.20 | 0.21 |
| Prodh        | 1.05 | 1.35 | 0.20 | 0.24 |
| Cdc42ep1     | 2.18 | 2.28 | 0.20 | 0.23 |
| Rab31        | 4.53 | 4.99 | 0.20 | 0.22 |
| Elovl1       | 0.81 | 0.88 | 0.20 | 0.21 |
| Adams16      | 0.27 | 0.27 | 0.20 | 0.23 |
| Macf1        | 5.06 | 5.68 | 0.20 | 0.22 |
| Tgfbr2       | 0.24 | 0.38 | 0.20 | 0.30 |
| Napsa        | 0.08 | 0.08 | 0.20 | 0.23 |
| Slc22a8      | 0.20 | 0.39 | 0.20 | 0.28 |
| Kirrel2      | 0.04 | 0.10 | 0.20 | 0.28 |
| Wnt10b       | 0.02 | 0.03 | 0.20 | 0.17 |
| En2          | 0.12 | 0.13 | 0.20 | 0.21 |
| Ryr3         | 0.99 | 0.97 | 0.20 | 0.20 |
| Pdgfrl       | 0.05 | 0.10 | 0.20 | 0.38 |
| Dock1        | 0.57 | 0.62 | 0.20 | 0.22 |
| Armc3        | 0.14 | 0.18 | 0.19 | 0.36 |
| Fam178b      | 0.07 | 0.07 | 0.19 | 0.13 |
| 1700084C01R1 | 2.30 | 2.15 | 0.19 | 0.19 |
| Bco2         | 0.14 | 0.19 | 0.19 | 0.34 |
| Gli2         | 0.11 | 0.12 | 0.19 | 0.21 |
| Kcnj16       | 0.60 | 0.90 | 0.19 | 0.28 |
| Npvf         | 1.49 | 1.65 | 0.19 | 0.18 |
| Slc39a12     | 0.95 | 1.63 | 0.19 | 0.31 |
| Echdc2       | 0.47 | 0.43 | 0.19 | 0.24 |
| Tst          | 3.56 | 3.66 | 0.19 | 0.20 |
| Alpl         | 0.16 | 0.29 | 0.19 | 0.30 |
| Adora2a      | 0.28 | 0.13 | 0.19 | 0.26 |
| Gramd3       | 1.01 | 1.06 | 0.19 | 0.20 |
| Yap1         | 0.60 | 0.75 | 0.19 | 0.23 |
| Bdh2         | 0.91 | 0.90 | 0.19 | 0.19 |
| Rfx4         | 1.33 | 1.51 | 0.19 | 0.24 |
| Twist1       | 0.09 | 0.12 | 0.19 | 0.25 |
| Ifi44        | 0.06 | 0.04 | 0.19 | 0.20 |
| Afap112      | 0.42 | 0.41 | 0.19 | 0.21 |
| Tm4sf1       | 0.70 | 0.67 | 0.19 | 0.22 |
| Olfir692     | 0.13 | 0.11 | 0.19 | 0.15 |
| Ctdsp1       | 1.95 | 2.29 | 0.19 | 0.22 |
| 5930412G12R  | 0.16 | 0.16 | 0.19 | 0.18 |
| Phkg1        | 1.09 | 1.31 | 0.19 | 0.23 |
| Lair1        | 0.28 | 0.36 | 0.19 | 0.26 |
| Spata3       | 0.05 | 0.09 | 0.19 | 0.23 |

|              |       |       |      |      |
|--------------|-------|-------|------|------|
| Aldh1a1      | 3.26  | 3.89  | 0.19 | 0.20 |
| Robo4        | 0.04  | 0.10  | 0.19 | 0.88 |
| Gm5531       | 0.09  | 0.08  | 0.19 | 0.17 |
| Fgfbp1       | 0.05  | 0.06  | 0.19 | 0.15 |
| Arhgef19     | 0.64  | 0.57  | 0.19 | 0.17 |
| Metrn        | 5.34  | 4.46  | 0.19 | 0.16 |
| Mdfic        | 0.15  | 0.22  | 0.19 | 0.27 |
| Bfsp2        | 0.62  | 0.62  | 0.19 | 0.17 |
| Smagp        | 0.10  | 0.16  | 0.19 | 0.28 |
| Qk           | 13.98 | 16.63 | 0.19 | 0.24 |
| Gfap         | 9.88  | 13.70 | 0.19 | 0.22 |
| Loxl2        | 0.20  | 0.23  | 0.19 | 0.22 |
| Filip1l      | 0.11  | 0.14  | 0.19 | 0.25 |
| C2           | 0.17  | 0.28  | 0.19 | 0.28 |
| Flnb         | 1.32  | 1.53  | 0.19 | 0.20 |
| Mr1          | 0.41  | 0.54  | 0.19 | 0.24 |
| Tlr4         | 0.04  | 0.04  | 0.19 | 0.21 |
| Adamts4      | 0.46  | 0.65  | 0.19 | 0.23 |
| Aldh3b1      | 0.56  | 0.81  | 0.19 | 0.27 |
| Fmo1         | 0.72  | 0.84  | 0.19 | 0.20 |
| Tpcn2        | 0.09  | 0.14  | 0.19 | 0.29 |
| Ptpn6        | 0.22  | 0.28  | 0.19 | 0.23 |
| Dbx2         | 1.22  | 1.47  | 0.19 | 0.22 |
| Plekhg2      | 0.08  | 0.11  | 0.19 | 0.28 |
| Fam180a      | 0.07  | 0.14  | 0.19 | 0.31 |
| Tmem125      | 0.98  | 1.05  | 0.19 | 0.18 |
| Upp1         | 0.22  | 0.21  | 0.19 | 0.19 |
| Tmc7         | 0.59  | 0.69  | 0.19 | 0.23 |
| Hey2         | 0.52  | 0.51  | 0.19 | 0.18 |
| Blnk         | 0.20  | 0.31  | 0.19 | 0.27 |
| Arap3        | 0.06  | 0.13  | 0.19 | 0.39 |
| Car5b        | 0.19  | 0.27  | 0.19 | 0.26 |
| E530001F21Ri | 0.40  | 0.42  | 0.19 | 0.17 |
| Lax1         | 0.03  | 0.05  | 0.19 | 0.24 |
| Dnahc6       | 0.06  | 0.09  | 0.19 | 0.36 |
| Prkd3        | 0.71  | 0.77  | 0.19 | 0.21 |
| Tfap2b       | 0.03  | 0.03  | 0.19 | 0.16 |
| Itpril2      | 0.11  | 0.13  | 0.18 | 0.26 |
| Calr4        | 0.05  | 0.05  | 0.18 | 0.26 |
| Cfh          | 0.15  | 0.29  | 0.18 | 0.34 |
| Slc6a19      | 0.04  | 0.07  | 0.18 | 0.31 |
| A730020M07P  | 0.10  | 0.05  | 0.18 | 0.15 |
| Rtn4rl2      | 0.07  | 0.16  | 0.18 | 0.19 |
| Selplg       | 0.48  | 0.52  | 0.18 | 0.18 |
| Kctd14       | 0.11  | 0.07  | 0.18 | 0.11 |
| Dab2         | 0.77  | 0.85  | 0.18 | 0.20 |
| Mdk          | 1.19  | 1.82  | 0.18 | 0.28 |
| Snap23       | 1.08  | 1.52  | 0.18 | 0.25 |
| Emilin2      | 0.12  | 0.17  | 0.18 | 0.29 |
| Hhip         | 0.15  | 0.22  | 0.18 | 0.24 |
| Fas          | 0.08  | 0.14  | 0.18 | 0.29 |
| A830007P12R  | 0.20  | 0.23  | 0.18 | 0.22 |
| Msrb3        | 0.22  | 0.34  | 0.18 | 0.32 |
| Hapln2       | 1.20  | 1.62  | 0.18 | 0.22 |
| Hepacam      | 2.72  | 3.12  | 0.18 | 0.19 |
| Sycp1        | 0.14  | 0.17  | 0.18 | 0.22 |
| Cyp2j9       | 0.61  | 0.85  | 0.18 | 0.21 |
| Snx31        | 0.09  | 0.15  | 0.18 | 0.27 |
| Papss2       | 0.73  | 0.79  | 0.18 | 0.19 |
| Tmem88b      | 6.06  | 7.34  | 0.18 | 0.22 |
| Slc35d2      | 0.04  | 0.03  | 0.18 | 0.22 |
| Mdfl         | 0.06  | 0.05  | 0.18 | 0.10 |
| Gitp         | 6.82  | 7.76  | 0.18 | 0.19 |
| Naalad2      | 0.05  | 0.09  | 0.18 | 0.41 |
| Ccdc146      | 0.14  | 0.13  | 0.18 | 0.23 |

|              |       |       |      |      |
|--------------|-------|-------|------|------|
| Il17ra       | 0.10  | 0.12  | 0.18 | 0.19 |
| Erg          | 0.05  | 0.12  | 0.18 | 0.48 |
| Fam176b      | 0.11  | 0.14  | 0.18 | 0.24 |
| Tctex1d4     | 0.37  | 0.27  | 0.18 | 0.16 |
| Slc12a4      | 0.23  | 0.32  | 0.18 | 0.25 |
| Atoh8        | 0.07  | 0.11  | 0.18 | 0.20 |
| 4831440E17Ri | 0.21  | 0.35  | 0.18 | 0.38 |
| Ripply3      | 0.05  | 0.15  | 0.18 | 0.48 |
| Gcnt4        | 0.07  | 0.09  | 0.18 | 0.22 |
| Six5         | 0.12  | 0.25  | 0.18 | 0.44 |
| C130074G19R  | 0.53  | 0.63  | 0.18 | 0.21 |
| Itgb4        | 0.37  | 0.43  | 0.18 | 0.22 |
| Hmgcs2       | 0.25  | 0.27  | 0.18 | 0.18 |
| Nlrp3        | 0.04  | 0.01  | 0.18 | 0.07 |
| Wdr63        | 0.13  | 0.14  | 0.18 | 0.23 |
| Etv4         | 0.34  | 0.37  | 0.18 | 0.20 |
| Gjc2         | 1.12  | 1.15  | 0.18 | 0.18 |
| Lyz1         | 0.07  | 0.13  | 0.18 | 0.34 |
| C4b          | 0.14  | 0.40  | 0.18 | 0.35 |
| Pik3cg       | 0.06  | 0.08  | 0.18 | 0.22 |
| Mlph         | 0.05  | 0.09  | 0.18 | 0.33 |
| Col27a1      | 0.06  | 0.07  | 0.18 | 0.20 |
| Cspg4        | 0.14  | 0.22  | 0.18 | 0.27 |
| Cml3         | 0.20  | 0.40  | 0.18 | 0.32 |
| AI414108     | 1.30  | 1.57  | 0.18 | 0.22 |
| Olig2        | 3.49  | 2.97  | 0.18 | 0.17 |
| Rdh5         | 0.31  | 0.45  | 0.18 | 0.24 |
| Gatsl3       | 0.36  | 0.43  | 0.18 | 0.25 |
| Ctsk         | 0.31  | 0.31  | 0.18 | 0.18 |
| Hes5         | 2.96  | 2.92  | 0.18 | 0.20 |
| Rbm41        | 0.37  | 0.49  | 0.18 | 0.25 |
| Arhgap25     | 0.08  | 0.08  | 0.18 | 0.25 |
| Slc7a10      | 1.09  | 1.55  | 0.18 | 0.23 |
| Atp8b1       | 0.07  | 0.11  | 0.18 | 0.26 |
| Nfatc1       | 0.18  | 0.16  | 0.18 | 0.14 |
| Mt2          | 34.24 | 31.74 | 0.18 | 0.16 |
| Stk38        | 2.15  | 2.50  | 0.18 | 0.23 |
| Tmprss5      | 0.08  | 0.08  | 0.18 | 0.16 |
| Shox2        | 0.53  | 0.50  | 0.18 | 0.14 |
| Evi2a        | 2.32  | 3.28  | 0.18 | 0.21 |
| Spag5        | 0.27  | 0.29  | 0.18 | 0.18 |
| Fgfr1        | 0.40  | 0.67  | 0.18 | 0.34 |
| Nod1         | 0.21  | 0.29  | 0.18 | 0.21 |
| Nfe2l2       | 0.99  | 1.23  | 0.18 | 0.22 |
| Inpp5d       | 0.17  | 0.19  | 0.18 | 0.16 |
| Amhr2        | 0.03  | 0.08  | 0.18 | 0.38 |
| Kcnk7        | 0.03  | 0.05  | 0.18 | 0.24 |
| Vcan         | 0.30  | 0.39  | 0.18 | 0.20 |
| Sox8         | 2.78  | 3.14  | 0.17 | 0.19 |
| Nfia         | 0.61  | 0.73  | 0.17 | 0.20 |
| Zfp36        | 0.23  | 0.31  | 0.17 | 0.21 |
| Abca8a       | 0.29  | 0.43  | 0.17 | 0.25 |
| Itih2        | 0.06  | 0.18  | 0.17 | 0.46 |
| Plekhf1      | 0.52  | 0.61  | 0.17 | 0.17 |
| B230323A14R  | 0.22  | 0.31  | 0.17 | 0.21 |
| Clec2d       | 0.23  | 0.39  | 0.17 | 0.31 |
| Hyal1        | 0.10  | 0.13  | 0.17 | 0.24 |
| Bcas1        | 2.40  | 3.06  | 0.17 | 0.23 |
| Epas1        | 2.13  | 2.77  | 0.17 | 0.24 |
| Zfp3612      | 2.05  | 2.25  | 0.17 | 0.20 |
| Sox17        | 0.07  | 0.17  | 0.17 | 0.46 |
| Slc1a3       | 4.80  | 7.29  | 0.17 | 0.25 |
| Qrfp         | 0.12  | 0.13  | 0.17 | 0.21 |
| Tdgf1        | 0.03  | 0.11  | 0.17 | 0.36 |
| Ccdc121      | 0.26  | 0.26  | 0.17 | 0.20 |

|              |       |       |      |      |
|--------------|-------|-------|------|------|
| Trim12c      | 0.16  | 0.12  | 0.17 | 0.12 |
| Paqr5        | 0.06  | 0.12  | 0.17 | 0.36 |
| Efna1        | 0.14  | 0.25  | 0.17 | 0.30 |
| Gm14827      | 0.15  | 0.21  | 0.17 | 0.27 |
| Arhgef10     | 1.44  | 1.77  | 0.17 | 0.22 |
| Hist1h4h     | 0.45  | 0.50  | 0.17 | 0.26 |
| Dio2         | 0.16  | 0.22  | 0.17 | 0.21 |
| Foxc1        | 0.18  | 0.25  | 0.17 | 0.22 |
| Plau         | 0.04  | 0.05  | 0.17 | 0.29 |
| Prr5l        | 0.83  | 0.97  | 0.17 | 0.19 |
| Matn4        | 0.26  | 0.36  | 0.17 | 0.20 |
| Mirg         | 0.89  | 1.16  | 0.17 | 0.24 |
| Col9a3       | 0.14  | 0.33  | 0.17 | 0.37 |
| Mrgprf       | 0.03  | 0.06  | 0.17 | 0.26 |
| Ikzf1        | 0.12  | 0.11  | 0.17 | 0.15 |
| Vcam1        | 0.30  | 0.41  | 0.17 | 0.24 |
| Irx1         | 0.35  | 0.32  | 0.17 | 0.18 |
| BC026585     | 1.09  | 1.34  | 0.17 | 0.21 |
| Wdr69        | 0.13  | 0.17  | 0.17 | 0.23 |
| Atp1a2       | 5.08  | 8.09  | 0.17 | 0.24 |
| E130114P18Ri | 0.89  | 1.30  | 0.17 | 0.29 |
| Rin3         | 0.05  | 0.09  | 0.17 | 0.24 |
| Irf6         | 0.03  | 0.05  | 0.17 | 0.32 |
| Adora3       | 0.05  | 0.08  | 0.17 | 0.35 |
| Ptpn22       | 0.05  | 0.10  | 0.17 | 0.32 |
| Casp12       | 0.06  | 0.09  | 0.17 | 0.26 |
| Lime1        | 2.21  | 2.32  | 0.17 | 0.17 |
| Col5a2       | 0.04  | 0.08  | 0.17 | 0.40 |
| Fgd6         | 0.21  | 0.29  | 0.17 | 0.21 |
| Fam89a       | 0.31  | 0.18  | 0.17 | 0.11 |
| Slc9a3r1     | 3.11  | 3.37  | 0.17 | 0.18 |
| Ager         | 0.05  | 0.09  | 0.17 | 0.33 |
| Gm410        | 0.33  | 0.31  | 0.16 | 0.14 |
| Tmc4         | 0.24  | 0.31  | 0.16 | 0.21 |
| Rian         | 56.17 | 63.99 | 0.16 | 0.20 |
| Acsf2        | 0.59  | 0.65  | 0.16 | 0.19 |
| 5930403L14Ri | 0.29  | 0.35  | 0.16 | 0.19 |
| Fzd2         | 0.18  | 0.28  | 0.16 | 0.24 |
| Slc38a3      | 0.75  | 1.15  | 0.16 | 0.24 |
| Apobec3      | 0.10  | 0.14  | 0.16 | 0.23 |
| Gm514        | 1.51  | 1.52  | 0.16 | 0.17 |
| Acta2        | 0.42  | 0.64  | 0.16 | 0.40 |
| Padi2        | 1.24  | 1.45  | 0.16 | 0.20 |
| Capn11       | 0.03  | 0.03  | 0.16 | 0.18 |
| Rnase4       | 0.62  | 0.78  | 0.16 | 0.18 |
| Phldb2       | 0.11  | 0.19  | 0.16 | 0.26 |
| Gjb6         | 2.39  | 3.38  | 0.16 | 0.23 |
| Slc5a7       | 0.33  | 0.41  | 0.16 | 0.26 |
| Mfsd2a       | 0.45  | 0.87  | 0.16 | 0.29 |
| Itgam        | 0.09  | 0.16  | 0.16 | 0.32 |
| Tgif1        | 0.29  | 0.27  | 0.16 | 0.19 |
| Srgn         | 0.23  | 0.48  | 0.16 | 0.29 |
| Casq1        | 0.09  | 0.11  | 0.16 | 0.15 |
| Cmtm7        | 0.23  | 0.37  | 0.16 | 0.23 |
| 1700110C19Ri | 0.14  | 0.17  | 0.16 | 0.23 |
| Sycp2        | 0.04  | 0.04  | 0.16 | 0.17 |
| Pla2g16      | 2.30  | 2.76  | 0.16 | 0.18 |
| Ttc23        | 0.20  | 0.40  | 0.16 | 0.37 |
| Slc38a6      | 0.71  | 0.94  | 0.16 | 0.24 |
| Pdlim4       | 1.44  | 1.04  | 0.16 | 0.12 |
| Cp           | 0.09  | 0.16  | 0.16 | 0.27 |
| Ccdc153      | 1.54  | 1.40  | 0.16 | 0.18 |
| Slc7a2       | 0.19  | 0.26  | 0.16 | 0.22 |
| Wnt9b        | 0.04  | 0.07  | 0.16 | 0.21 |
| Ccdc105      | 0.15  | 0.24  | 0.16 | 0.42 |

|             |      |      |      |      |
|-------------|------|------|------|------|
| Zmynd17     | 0.03 | 0.06 | 0.16 | 0.45 |
| Hhat1       | 0.29 | 0.49 | 0.16 | 0.27 |
| Lfng        | 0.72 | 1.01 | 0.16 | 0.21 |
| Col9a1      | 0.03 | 0.04 | 0.16 | 0.22 |
| Apoa4       | 0.01 | 0.03 | 0.16 | 0.17 |
| Gypc        | 0.06 | 0.10 | 0.16 | 0.17 |
| Gm221       | 0.08 | 0.07 | 0.16 | 0.17 |
| Fcgr1       | 0.05 | 0.08 | 0.16 | 0.21 |
| Col15a1     | 0.07 | 0.10 | 0.16 | 0.23 |
| Thsd1       | 0.09 | 0.14 | 0.16 | 0.29 |
| Inf2        | 1.19 | 1.31 | 0.16 | 0.20 |
| Plscr2      | 0.18 | 0.24 | 0.16 | 0.17 |
| Aldh1a2     | 0.67 | 1.00 | 0.16 | 0.18 |
| Ucp3        | 0.20 | 0.27 | 0.16 | 0.20 |
| Plxnb3      | 0.38 | 0.47 | 0.16 | 0.20 |
| Gprc5c      | 0.04 | 0.06 | 0.16 | 0.23 |
| Rgs5        | 0.89 | 1.47 | 0.16 | 0.30 |
| Plekhg3     | 0.51 | 0.61 | 0.16 | 0.20 |
| Nde1        | 1.27 | 1.28 | 0.16 | 0.15 |
| Cdr1        | 0.73 | 0.70 | 0.16 | 0.16 |
| Rtbdn       | 0.15 | 0.17 | 0.16 | 0.21 |
| Slc2a4      | 0.02 | 0.08 | 0.16 | 0.32 |
| Scrg1       | 1.49 | 1.58 | 0.16 | 0.14 |
| Sorbs3      | 1.09 | 1.29 | 0.16 | 0.20 |
| Ednrb       | 1.26 | 1.90 | 0.16 | 0.24 |
| Rftn2       | 1.15 | 1.35 | 0.16 | 0.19 |
| Zcchc24     | 2.62 | 3.07 | 0.15 | 0.18 |
| Mup6        | 0.51 | 0.98 | 0.15 | 0.26 |
| 2810055G20R | 0.03 | 0.05 | 0.15 | 0.23 |
| Elovl7      | 0.44 | 0.58 | 0.15 | 0.20 |
| Muc1        | 0.04 | 0.02 | 0.15 | 0.06 |
| B230206H07R | 0.13 | 0.11 | 0.15 | 0.14 |
| Tmem98      | 0.88 | 1.05 | 0.15 | 0.18 |
| Mrc1        | 0.03 | 0.03 | 0.15 | 0.22 |
| Anpep       | 0.03 | 0.06 | 0.15 | 0.29 |
| Dmc1        | 0.07 | 0.16 | 0.15 | 0.31 |
| Tnni1       | 0.32 | 0.30 | 0.15 | 0.19 |
| Plip        | 3.42 | 4.07 | 0.15 | 0.17 |
| Slco2b1     | 0.16 | 0.29 | 0.15 | 0.30 |
| Agt         | 2.59 | 4.57 | 0.15 | 0.24 |
| Tnfaip8     | 0.53 | 0.62 | 0.15 | 0.20 |
| Cd4         | 0.04 | 0.04 | 0.15 | 0.40 |
| Arhgdib     | 0.69 | 0.77 | 0.15 | 0.14 |
| Tbx18       | 0.06 | 0.10 | 0.15 | 0.26 |
| Slc13a5     | 0.13 | 0.21 | 0.15 | 0.23 |
| Gm19990     | 0.10 | 0.13 | 0.15 | 0.23 |
| Trp63       | 0.11 | 0.14 | 0.15 | 0.26 |
| Hmcn1       | 0.05 | 0.08 | 0.15 | 0.25 |
| Gpr17       | 0.63 | 1.08 | 0.15 | 0.24 |
| Oaf         | 0.08 | 0.10 | 0.15 | 0.22 |
| Car9        | 0.06 | 0.08 | 0.15 | 0.18 |
| Cml5        | 0.16 | 0.10 | 0.15 | 0.09 |
| Gli3        | 0.08 | 0.12 | 0.15 | 0.24 |
| Ccbe1       | 0.06 | 0.09 | 0.15 | 0.25 |
| Axl         | 0.28 | 0.40 | 0.15 | 0.21 |
| ligp1       | 0.06 | 0.06 | 0.15 | 0.18 |
| Pcolce      | 0.11 | 0.17 | 0.15 | 0.19 |
| Col19a1     | 0.03 | 0.06 | 0.15 | 0.23 |
| Sox10       | 3.67 | 3.76 | 0.15 | 0.15 |
| 4930417G10R | 0.08 | 0.10 | 0.15 | 0.16 |
| Klhdc7a     | 0.19 | 0.24 | 0.15 | 0.19 |
| Samd9l      | 0.09 | 0.15 | 0.15 | 0.25 |
| Gm98        | 0.86 | 1.27 | 0.15 | 0.20 |
| Ttr         | 0.23 | 0.25 | 0.15 | 0.13 |
| Trim47      | 0.14 | 0.21 | 0.15 | 0.27 |

|             |      |       |      |      |
|-------------|------|-------|------|------|
| Heph        | 0.06 | 0.09  | 0.15 | 0.21 |
| S100a6      | 3.62 | 4.44  | 0.15 | 0.17 |
| 2310022B05R | 7.12 | 7.90  | 0.15 | 0.16 |
| Fcgr2b      | 0.08 | 0.05  | 0.15 | 0.10 |
| S1pr1       | 1.47 | 2.47  | 0.15 | 0.25 |
| Tmem40      | 0.06 | 0.10  | 0.15 | 0.31 |
| ErbB3       | 0.15 | 0.17  | 0.15 | 0.16 |
| Arhgef5     | 0.03 | 0.05  | 0.15 | 0.22 |
| S100a13     | 2.81 | 3.57  | 0.15 | 0.17 |
| A330049N07R | 0.10 | 0.14  | 0.15 | 0.17 |
| 2610034M16R | 0.13 | 0.16  | 0.15 | 0.22 |
| Sod3        | 0.14 | 0.22  | 0.15 | 0.22 |
| Mfge8       | 1.20 | 2.06  | 0.15 | 0.24 |
| Ly6a        | 0.31 | 1.56  | 0.15 | 0.69 |
| Epx         | 0.05 | 0.06  | 0.15 | 0.18 |
| Ly6g6d      | 0.17 | 0.17  | 0.15 | 0.15 |
| Htra3       | 0.26 | 0.29  | 0.15 | 0.16 |
| Six1        | 0.06 | 0.04  | 0.15 | 0.12 |
| Tmem119     | 0.38 | 0.44  | 0.15 | 0.16 |
| Mertk       | 0.23 | 0.32  | 0.15 | 0.19 |
| Figf        | 0.07 | 0.09  | 0.15 | 0.21 |
| F13a1       | 0.10 | 0.12  | 0.15 | 0.17 |
| Cd37        | 0.11 | 0.08  | 0.15 | 0.12 |
| Fndc3c1     | 0.05 | 0.05  | 0.15 | 0.15 |
| Mobp        | 9.95 | 13.45 | 0.15 | 0.17 |
| Gm684       | 0.12 | 0.14  | 0.15 | 0.19 |
| Gm266       | 0.57 | 0.45  | 0.15 | 0.12 |
| Sgk2        | 0.19 | 0.23  | 0.15 | 0.17 |
| Col12a1     | 0.08 | 0.12  | 0.15 | 0.20 |
| Slc6a12     | 0.03 | 0.01  | 0.15 | 0.05 |
| Cd34        | 0.14 | 0.48  | 0.15 | 0.44 |
| St6galnac2  | 0.04 | 0.12  | 0.15 | 0.55 |
| Dapk2       | 0.17 | 0.18  | 0.14 | 0.15 |
| Ednra       | 0.05 | 0.14  | 0.14 | 0.41 |
| Anxa3       | 0.49 | 0.70  | 0.14 | 0.21 |
| Trim30a     | 0.06 | 0.05  | 0.14 | 0.13 |
| Gjb1        | 1.06 | 1.25  | 0.14 | 0.16 |
| Npff        | 0.18 | 0.18  | 0.14 | 0.13 |
| Lgi4        | 0.56 | 0.70  | 0.14 | 0.17 |
| Phgdh       | 4.82 | 5.39  | 0.14 | 0.16 |
| P2ry12      | 0.79 | 1.02  | 0.14 | 0.19 |
| Tmbim1      | 1.35 | 1.87  | 0.14 | 0.18 |
| Lefty1      | 0.10 | 0.12  | 0.14 | 0.18 |
| BC006965    | 0.02 | 0.09  | 0.14 | 0.26 |
| Copz2       | 0.56 | 0.56  | 0.14 | 0.14 |
| Rasgrp3     | 0.44 | 0.60  | 0.14 | 0.18 |
| Acsbg1      | 4.41 | 5.20  | 0.14 | 0.17 |
| Fyb         | 0.08 | 0.06  | 0.14 | 0.14 |
| Kcnj10      | 2.15 | 3.42  | 0.14 | 0.21 |
| Cx3cr1      | 0.44 | 0.53  | 0.14 | 0.16 |
| Tlr3        | 0.15 | 0.22  | 0.14 | 0.25 |
| Cldn10      | 1.70 | 1.97  | 0.14 | 0.18 |
| Capn6       | 0.16 | 0.24  | 0.14 | 0.24 |
| Ctsc        | 0.11 | 0.22  | 0.14 | 0.31 |
| Ehd2        | 0.17 | 0.33  | 0.14 | 0.30 |
| Hapln3      | 0.04 | 0.03  | 0.14 | 0.10 |
| Gng11       | 4.33 | 4.85  | 0.14 | 0.16 |
| Adrb2       | 0.06 | 0.24  | 0.14 | 0.55 |
| Nhlrc4      | 0.06 | 0.10  | 0.14 | 0.25 |
| Olfir287    | 0.11 | 0.04  | 0.14 | 0.05 |
| Sfrp5       | 0.39 | 0.54  | 0.14 | 0.18 |
| Cd74        | 0.42 | 0.68  | 0.14 | 0.19 |
| Ldlrap1     | 0.18 | 0.19  | 0.14 | 0.15 |
| Cdk2        | 0.13 | 0.14  | 0.14 | 0.16 |
| D7Erttd715e | 1.77 | 2.16  | 0.14 | 0.20 |

|              |       |       |      |      |
|--------------|-------|-------|------|------|
| Txndc3       | 0.04  | 0.05  | 0.14 | 0.14 |
| Mbp          | 73.83 | 96.16 | 0.14 | 0.17 |
| Ddr2         | 0.04  | 0.10  | 0.14 | 0.32 |
| Arl11        | 0.04  | 0.09  | 0.14 | 0.32 |
| Dock5        | 0.24  | 0.33  | 0.14 | 0.18 |
| Unc93b1      | 0.23  | 0.41  | 0.14 | 0.21 |
| Tbata        | 0.05  | 0.10  | 0.14 | 0.27 |
| Slc14a1      | 0.23  | 0.37  | 0.14 | 0.21 |
| H2-Aa        | 0.16  | 0.31  | 0.14 | 0.16 |
| Klk6         | 0.44  | 0.72  | 0.14 | 0.20 |
| Nid1         | 0.06  | 0.15  | 0.14 | 0.33 |
| Gpr3711      | 2.67  | 4.54  | 0.14 | 0.22 |
| Gja1         | 2.61  | 4.53  | 0.14 | 0.23 |
| Vav1         | 0.08  | 0.09  | 0.14 | 0.18 |
| Lpcat2       | 0.17  | 0.28  | 0.14 | 0.24 |
| Col1a1       | 0.06  | 0.07  | 0.14 | 0.18 |
| Gatm         | 11.09 | 11.94 | 0.14 | 0.16 |
| Lpar6        | 0.27  | 0.30  | 0.14 | 0.19 |
| Cldn11       | 7.07  | 11.14 | 0.14 | 0.18 |
| Irf8         | 0.18  | 0.16  | 0.14 | 0.11 |
| Aspa         | 3.62  | 3.96  | 0.14 | 0.15 |
| Heyl         | 0.62  | 0.60  | 0.14 | 0.15 |
| Pdgfra       | 0.42  | 0.70  | 0.14 | 0.22 |
| Expi         | 0.39  | 0.27  | 0.14 | 0.12 |
| Wsb1         | 9.02  | 12.17 | 0.14 | 0.21 |
| Opalin       | 4.09  | 4.84  | 0.14 | 0.16 |
| Pdlim1       | 0.38  | 0.42  | 0.14 | 0.15 |
| Athl1        | 0.17  | 0.21  | 0.14 | 0.21 |
| Fabp7        | 6.46  | 6.29  | 0.14 | 0.17 |
| Aqp9         | 0.05  | 0.07  | 0.14 | 0.22 |
| Hist1h2bc    | 3.58  | 3.97  | 0.14 | 0.15 |
| Csf2rb2      | 0.01  | 0.02  | 0.13 | 0.11 |
| Sall1        | 0.51  | 0.55  | 0.13 | 0.15 |
| S100a1       | 9.63  | 11.35 | 0.13 | 0.16 |
| Csrp1        | 22.21 | 24.73 | 0.13 | 0.15 |
| Ctla2b       | 0.04  | 0.06  | 0.13 | 0.19 |
| Dmpk         | 0.33  | 0.51  | 0.13 | 0.21 |
| Bgn          | 0.24  | 0.37  | 0.13 | 0.17 |
| Snai1        | 0.04  | 0.03  | 0.13 | 0.09 |
| Nckap1l      | 0.17  | 0.25  | 0.13 | 0.20 |
| Ifitm3       | 0.99  | 1.29  | 0.13 | 0.19 |
| Neu4         | 0.38  | 0.46  | 0.13 | 0.16 |
| Irf5         | 0.21  | 0.23  | 0.13 | 0.15 |
| Ugt8a        | 1.88  | 2.99  | 0.13 | 0.21 |
| Cyp2j12      | 0.29  | 0.43  | 0.13 | 0.16 |
| Slc22a18     | 0.03  | 0.06  | 0.13 | 0.33 |
| Trf          | 7.29  | 12.11 | 0.13 | 0.18 |
| Pkd2l1       | 0.03  | 0.03  | 0.13 | 0.17 |
| Apoe         | 31.96 | 45.54 | 0.13 | 0.16 |
| Gstk1        | 1.00  | 1.37  | 0.13 | 0.16 |
| Cyp27a1      | 0.25  | 0.40  | 0.13 | 0.19 |
| Xaf1         | 0.21  | 0.24  | 0.13 | 0.15 |
| Car13        | 0.14  | 0.19  | 0.13 | 0.17 |
| Apod         | 3.66  | 5.50  | 0.13 | 0.16 |
| Efh1         | 2.95  | 2.67  | 0.13 | 0.12 |
| Hcrt         | 49.28 | 45.18 | 0.13 | 0.14 |
| Emp2         | 0.17  | 0.22  | 0.13 | 0.19 |
| Alpk1        | 0.10  | 0.13  | 0.13 | 0.14 |
| Itih3        | 2.19  | 4.14  | 0.13 | 0.23 |
| 2010317E24Ri | 0.08  | 0.10  | 0.13 | 0.17 |
| Mgp          | 0.81  | 1.23  | 0.13 | 0.17 |
| Edn1         | 0.02  | 0.06  | 0.13 | 0.28 |
| Lpar4        | 0.06  | 0.08  | 0.13 | 0.24 |
| Baz1a        | 0.02  | 0.02  | 0.13 | 0.19 |
| Zfp3611      | 1.17  | 1.44  | 0.13 | 0.16 |

|              |      |      |      |      |
|--------------|------|------|------|------|
| Dnahc7b      | 0.18 | 0.21 | 0.13 | 0.16 |
| 4930583H14R  | 0.05 | 0.09 | 0.13 | 0.27 |
| Dnali1       | 0.44 | 0.52 | 0.13 | 0.17 |
| Paqr6        | 0.63 | 0.86 | 0.13 | 0.17 |
| Dcn          | 0.39 | 0.60 | 0.13 | 0.17 |
| Endou        | 0.05 | 0.09 | 0.13 | 0.17 |
| Gm5535       | 0.05 | 0.10 | 0.13 | 0.24 |
| Lpar1        | 0.58 | 0.74 | 0.13 | 0.15 |
| E230019M04R  | 0.05 | 0.08 | 0.13 | 0.27 |
| Npas4        | 0.24 | 0.31 | 0.13 | 0.17 |
| Adamtsl4     | 0.21 | 0.37 | 0.13 | 0.24 |
| Daam2        | 1.21 | 1.42 | 0.13 | 0.14 |
| Agxt2l1      | 1.72 | 2.54 | 0.13 | 0.16 |
| Apobr        | 0.02 | 0.03 | 0.13 | 0.16 |
| Spp1         | 0.37 | 0.64 | 0.13 | 0.19 |
| Tmem45a      | 0.02 | 0.02 | 0.13 | 0.15 |
| Clec5a       | 0.03 | 0.02 | 0.13 | 0.12 |
| Cdh19        | 0.19 | 0.32 | 0.13 | 0.18 |
| Ecscr        | 0.08 | 0.07 | 0.13 | 0.26 |
| Serpib1a     | 0.94 | 1.23 | 0.13 | 0.15 |
| Btk          | 0.04 | 0.04 | 0.13 | 0.09 |
| Nipal4       | 0.15 | 0.18 | 0.13 | 0.12 |
| E030003E18Ri | 0.29 | 0.46 | 0.13 | 0.20 |
| Sctr         | 0.04 | 0.07 | 0.13 | 0.31 |
| Gm20554      | 0.02 | 0.03 | 0.13 | 0.16 |
| S100b        | 8.16 | 9.17 | 0.13 | 0.14 |
| Ifitm1       | 0.38 | 0.47 | 0.13 | 0.16 |
| Tnnt1        | 0.90 | 1.14 | 0.13 | 0.14 |
| S100a16      | 7.07 | 7.93 | 0.13 | 0.15 |
| Tmem173      | 0.05 | 0.14 | 0.13 | 0.24 |
| Slc25a34     | 0.14 | 0.14 | 0.13 | 0.13 |
| Mgst1        | 0.93 | 1.48 | 0.13 | 0.18 |
| Tmem181b-ps  | 5.44 | 6.92 | 0.12 | 0.18 |
| 6720401G13R  | 1.26 | 1.73 | 0.12 | 0.17 |
| Hhex         | 0.12 | 0.07 | 0.12 | 0.07 |
| Cyr61        | 0.07 | 0.13 | 0.12 | 0.27 |
| Clcn1        | 0.06 | 0.11 | 0.12 | 0.22 |
| Sp7          | 0.07 | 0.12 | 0.12 | 0.17 |
| Mlc1         | 2.43 | 4.04 | 0.12 | 0.20 |
| Fcgr3        | 0.34 | 0.41 | 0.12 | 0.13 |
| Aass         | 0.11 | 0.15 | 0.12 | 0.18 |
| Nwd1         | 0.47 | 0.54 | 0.12 | 0.13 |
| Ranbp3l      | 0.16 | 0.26 | 0.12 | 0.16 |
| Abca9        | 0.08 | 0.14 | 0.12 | 0.21 |
| P2rx7        | 0.14 | 0.25 | 0.12 | 0.22 |
| 2700046A07R  | 0.08 | 0.10 | 0.12 | 0.16 |
| Ntsr2        | 4.70 | 6.90 | 0.12 | 0.17 |
| S100a11      | 1.98 | 3.88 | 0.12 | 0.23 |
| Olig1        | 9.82 | 9.54 | 0.12 | 0.13 |
| Cd38         | 0.24 | 0.42 | 0.12 | 0.21 |
| Fmod         | 0.17 | 0.25 | 0.12 | 0.10 |
| Cd48         | 0.02 | 0.06 | 0.12 | 0.21 |
| Gjb2         | 0.19 | 0.24 | 0.12 | 0.13 |
| Calml4       | 0.77 | 0.79 | 0.12 | 0.14 |
| Gjc3         | 2.61 | 3.29 | 0.12 | 0.15 |
| Gm7694       | 0.14 | 0.18 | 0.12 | 0.15 |
| Akr1c14      | 0.06 | 0.22 | 0.12 | 0.45 |
| Acss3        | 0.11 | 0.14 | 0.12 | 0.14 |
| Klhl6        | 0.05 | 0.07 | 0.12 | 0.14 |
| Spata18      | 0.09 | 0.12 | 0.12 | 0.17 |
| Slc47a1      | 0.02 | 0.03 | 0.12 | 0.13 |
| Slc45a3      | 0.05 | 0.06 | 0.12 | 0.13 |
| Ernm         | 5.25 | 6.30 | 0.12 | 0.15 |
| Ttyh2        | 0.72 | 1.11 | 0.12 | 0.16 |
| Cryab        | 8.95 | 9.97 | 0.12 | 0.13 |



|              |       |       |      |      |
|--------------|-------|-------|------|------|
| 4930447C04R  | 1.02  | 1.47  | 0.12 | 0.20 |
| Adra2b       | 0.04  | 0.03  | 0.12 | 0.11 |
| Sifn8        | 0.03  | 0.04  | 0.12 | 0.20 |
| Tmem63a      | 0.78  | 1.11  | 0.12 | 0.16 |
| Ii33         | 3.58  | 5.58  | 0.12 | 0.16 |
| 4930451C15R  | 0.17  | 0.15  | 0.12 | 0.12 |
| Car2         | 19.73 | 22.08 | 0.12 | 0.13 |
| Adhfe1       | 0.31  | 0.35  | 0.12 | 0.14 |
| Nanog        | 0.03  | 0.04  | 0.12 | 0.15 |
| Hif3a        | 0.07  | 0.10  | 0.12 | 0.13 |
| Slc6a20a     | 0.10  | 0.16  | 0.12 | 0.14 |
| Agmo         | 0.09  | 0.20  | 0.12 | 0.18 |
| Rasa3        | 0.03  | 0.07  | 0.12 | 0.25 |
| Ly86         | 0.30  | 0.26  | 0.12 | 0.09 |
| Sntn         | 0.25  | 0.24  | 0.12 | 0.13 |
| Csf1r        | 0.38  | 0.67  | 0.12 | 0.18 |
| Nupr1        | 0.93  | 0.95  | 0.12 | 0.10 |
| Slc17a7      | 0.34  | 1.32  | 0.12 | 0.12 |
| Pdlim2       | 1.05  | 1.19  | 0.12 | 0.13 |
| Ncf4         | 0.07  | 0.07  | 0.12 | 0.14 |
| Gli1         | 0.27  | 0.33  | 0.12 | 0.16 |
| Slc16a4      | 0.06  | 0.12  | 0.11 | 0.30 |
| Dok1         | 0.07  | 0.12  | 0.11 | 0.20 |
| 4632428N05R  | 0.18  | 0.29  | 0.11 | 0.18 |
| Gmfg         | 0.07  | 0.06  | 0.11 | 0.08 |
| D730048J04R  | 0.13  | 0.13  | 0.11 | 0.19 |
| Vamp8        | 1.04  | 1.39  | 0.11 | 0.15 |
| Aqp4         | 1.04  | 1.72  | 0.11 | 0.20 |
| Olfml1       | 0.36  | 0.58  | 0.11 | 0.15 |
| Emid1        | 0.08  | 0.18  | 0.11 | 0.22 |
| Cd180        | 0.04  | 0.05  | 0.11 | 0.14 |
| Sh3tc2       | 0.11  | 0.17  | 0.11 | 0.18 |
| BC064078     | 0.62  | 0.72  | 0.11 | 0.16 |
| Pitx1        | 0.07  | 0.04  | 0.11 | 0.07 |
| Plin3        | 1.15  | 1.56  | 0.11 | 0.12 |
| Litaf        | 2.01  | 2.16  | 0.11 | 0.12 |
| Itgb2        | 0.04  | 0.07  | 0.11 | 0.23 |
| Hba-a1,Hba-a | 1.24  | 4.48  | 0.11 | 0.45 |
| Id3          | 2.55  | 3.85  | 0.11 | 0.15 |
| Lyl1         | 0.08  | 0.11  | 0.11 | 0.20 |
| A330023F24R  | 1.38  | 1.71  | 0.11 | 0.15 |
| AU021034     | 0.31  | 0.36  | 0.11 | 0.14 |
| Naip5        | 0.02  | 0.02  | 0.11 | 0.11 |
| Grap         | 0.13  | 0.20  | 0.11 | 0.19 |
| Sparc        | 8.35  | 13.82 | 0.11 | 0.17 |
| Sepp1        | 7.26  | 10.54 | 0.11 | 0.15 |
| Fxyd3        | 0.24  | 0.29  | 0.11 | 0.12 |
| Slamf9       | 0.03  | 0.07  | 0.11 | 0.19 |
| Sp100        | 0.03  | 0.06  | 0.11 | 0.24 |
| 5430435G22R  | 0.09  | 0.10  | 0.11 | 0.12 |
| Mog          | 3.58  | 5.64  | 0.11 | 0.15 |
| C1qa         | 0.73  | 0.83  | 0.11 | 0.11 |
| 8030442B05R  | 0.06  | 0.10  | 0.11 | 0.18 |
| Fcrls        | 0.08  | 0.11  | 0.11 | 0.19 |
| Lyz2         | 0.27  | 0.51  | 0.11 | 0.17 |
| H2-Ab1       | 0.08  | 0.17  | 0.11 | 0.16 |
| 4933425O20R  | 0.05  | 0.02  | 0.11 | 0.06 |
| Was          | 0.04  | 0.04  | 0.11 | 0.08 |
| Btla         | 0.02  | 0.03  | 0.11 | 0.13 |
| Apoc1        | 0.77  | 0.96  | 0.11 | 0.09 |
| Cga          | 0.56  | 0.34  | 0.11 | 0.11 |
| Sec14l5      | 0.19  | 0.25  | 0.11 | 0.14 |
| Sdc4         | 0.66  | 1.27  | 0.11 | 0.19 |
| Beta-s       | 3.41  | 12.03 | 0.11 | 0.37 |
| Plp1         | 47.67 | 73.29 | 0.11 | 0.15 |

|              |       |       |      |      |
|--------------|-------|-------|------|------|
| Ptgds        | 23.07 | 36.24 | 0.11 | 0.11 |
| Samsn1       | 0.08  | 0.15  | 0.11 | 0.19 |
| Anxa8        | 0.10  | 0.13  | 0.11 | 0.18 |
| Fgd2         | 0.12  | 0.13  | 0.10 | 0.11 |
| Rbpms2       | 0.14  | 0.28  | 0.10 | 0.20 |
| Gstt3        | 0.35  | 0.50  | 0.10 | 0.16 |
| Cd9          | 1.94  | 3.19  | 0.10 | 0.17 |
| Tead2        | 0.07  | 0.09  | 0.10 | 0.11 |
| Pmch         | 60.63 | 84.02 | 0.10 | 0.14 |
| Fa2h         | 1.33  | 1.99  | 0.10 | 0.14 |
| C1qb         | 0.91  | 0.92  | 0.10 | 0.11 |
| Sfpi1        | 0.19  | 0.15  | 0.10 | 0.07 |
| 9930111J21Ri | 0.02  | 0.04  | 0.10 | 0.24 |
| Tbx2         | 0.05  | 0.14  | 0.10 | 0.31 |
| Cyp3a13      | 0.02  | 0.03  | 0.10 | 0.13 |
| Oxt          | 61.34 | 67.46 | 0.10 | 0.12 |
| Slc15a2      | 0.25  | 0.37  | 0.10 | 0.15 |
| 1500015L24Ri | 0.14  | 0.31  | 0.10 | 0.16 |
| Lcat         | 0.31  | 0.61  | 0.10 | 0.19 |
| Irx2         | 0.13  | 0.14  | 0.10 | 0.13 |
| Cyba         | 0.25  | 0.35  | 0.10 | 0.15 |
| Pla2g4c      | 0.02  | 0.02  | 0.10 | 0.09 |
| Pipox        | 0.28  | 0.39  | 0.10 | 0.16 |
| Mal          | 6.94  | 10.73 | 0.10 | 0.13 |
| Adm          | 0.04  | 0.09  | 0.10 | 0.22 |
| Ttll8        | 0.05  | 0.06  | 0.10 | 0.14 |
| Ninj2        | 0.31  | 0.44  | 0.10 | 0.11 |
| Hspb2        | 0.06  | 0.08  | 0.10 | 0.13 |
| Gm19522      | 0.03  | 0.07  | 0.10 | 0.19 |
| Birc7        | 0.03  | 0.03  | 0.10 | 0.10 |
| Siglech      | 0.17  | 0.20  | 0.10 | 0.12 |
| 4930547N16R  | 8.40  | 12.08 | 0.10 | 0.13 |
| Hcls1        | 0.13  | 0.21  | 0.10 | 0.15 |
| Fam47e       | 0.06  | 0.10  | 0.10 | 0.14 |
| Aldob        | 0.13  | 0.18  | 0.10 | 0.13 |
| Prtg         | 0.05  | 0.12  | 0.10 | 0.25 |
| Tmem212      | 0.21  | 0.47  | 0.10 | 0.21 |
| Enpp6        | 0.13  | 0.29  | 0.10 | 0.20 |
| P2ry6        | 0.04  | 0.06  | 0.10 | 0.13 |
| Lyg2         | 0.05  | 0.05  | 0.10 | 0.10 |
| Fcer1g       | 0.51  | 0.69  | 0.10 | 0.16 |
| Hist1h2ac    | 0.02  | 0.03  | 0.10 | 0.15 |
| Hbb-b1,Hbb-b | 0.29  | 0.26  | 0.10 | 0.09 |
| Csf3r        | 0.06  | 0.08  | 0.10 | 0.15 |
| Slc36a2      | 0.01  | 0.03  | 0.09 | 0.21 |
| Cd53         | 0.09  | 0.16  | 0.09 | 0.17 |
| Amy1         | 1.90  | 3.01  | 0.09 | 0.16 |
| Susd3        | 0.04  | 0.03  | 0.09 | 0.06 |
| Ncf2         | 0.09  | 0.14  | 0.09 | 0.19 |
| Smpx         | 0.02  | 0.05  | 0.09 | 0.19 |
| C030023E24Ri | 0.64  | 0.78  | 0.09 | 0.13 |
| Pla2g4a      | 0.07  | 0.18  | 0.09 | 0.20 |
| Gnrh1        | 0.59  | 0.44  | 0.09 | 0.10 |
| Vamp5        | 0.12  | 0.28  | 0.09 | 0.18 |
| Trim12a      | 0.05  | 0.07  | 0.09 | 0.18 |
| Anxa1        | 0.27  | 0.34  | 0.09 | 0.15 |
| Slc22a6      | 0.03  | 0.04  | 0.09 | 0.07 |
| Higd1b       | 0.22  | 0.38  | 0.09 | 0.23 |
| Ctss         | 0.97  | 1.62  | 0.09 | 0.15 |
| Adap2        | 0.08  | 0.18  | 0.09 | 0.17 |
| Atp13a4      | 0.35  | 0.68  | 0.09 | 0.18 |
| 1810011O10R  | 0.06  | 0.14  | 0.09 | 0.21 |
| Ccr5         | 0.09  | 0.10  | 0.09 | 0.12 |
| Ogn          | 0.12  | 0.27  | 0.09 | 0.15 |
| Ppp1r14a     | 5.86  | 6.46  | 0.09 | 0.11 |

|              |       |       |      |      |
|--------------|-------|-------|------|------|
| Mfsd7a       | 0.02  | 0.03  | 0.09 | 0.13 |
| 1700024G13R  | 0.39  | 0.45  | 0.09 | 0.09 |
| Myo1f        | 0.03  | 0.06  | 0.09 | 0.13 |
| Ccl12        | 0.04  | 0.10  | 0.09 | 0.10 |
| Cyp4f14      | 0.07  | 0.19  | 0.09 | 0.20 |
| Acer2        | 0.03  | 0.11  | 0.09 | 0.40 |
| Nuf2         | 0.24  | 0.38  | 0.09 | 0.15 |
| Akr1c13      | 0.03  | 0.02  | 0.09 | 0.08 |
| Laptn5       | 0.32  | 0.46  | 0.09 | 0.11 |
| Ttc29        | 0.04  | 0.08  | 0.09 | 0.21 |
| Aif1l        | 0.42  | 0.56  | 0.08 | 0.12 |
| Cfp          | 0.23  | 0.28  | 0.08 | 0.13 |
| Hsf5         | 0.01  | 0.05  | 0.08 | 0.32 |
| Folh1        | 0.21  | 0.58  | 0.08 | 0.19 |
| Arhgap30     | 0.03  | 0.05  | 0.08 | 0.19 |
| Emcn         | 0.03  | 0.26  | 0.08 | 0.58 |
| Cd163        | 0.01  | 0.03  | 0.08 | 0.20 |
| Lum          | 0.03  | 0.10  | 0.08 | 0.30 |
| BC013712     | 0.02  | 0.03  | 0.08 | 0.11 |
| Tnfaip6      | 0.27  | 0.69  | 0.08 | 0.16 |
| Ctsh         | 0.12  | 0.31  | 0.08 | 0.18 |
| C3ar1        | 0.01  | 0.02  | 0.08 | 0.18 |
| Ms4a6d       | 0.01  | 0.03  | 0.08 | 0.14 |
| Rreb1        | 0.39  | 0.57  | 0.08 | 0.11 |
| Casp8        | 0.06  | 0.10  | 0.08 | 0.16 |
| Havcr2       | 0.03  | 0.04  | 0.08 | 0.14 |
| Mboat1       | 0.09  | 0.18  | 0.08 | 0.14 |
| Cyp4f15      | 0.14  | 0.31  | 0.08 | 0.14 |
| 1700047M11F  | 0.61  | 1.33  | 0.08 | 0.16 |
| Ptprc        | 0.03  | 0.05  | 0.07 | 0.18 |
| S100a4       | 0.32  | 0.84  | 0.07 | 0.20 |
| 2900052N01R  | 1.32  | 1.86  | 0.07 | 0.10 |
| Ltc4s        | 0.08  | 0.10  | 0.07 | 0.10 |
| Crxos1       | 0.04  | 0.08  | 0.07 | 0.22 |
| 2310007L24Ri | 0.09  | 0.10  | 0.07 | 0.12 |
| Gbp11        | 0.02  | 0.06  | 0.07 | 0.22 |
| BC035044     | 0.04  | 0.06  | 0.07 | 0.24 |
| C1qc         | 0.48  | 0.96  | 0.07 | 0.14 |
| Thpo         | 0.10  | 0.13  | 0.07 | 0.11 |
| Pld4         | 0.09  | 0.11  | 0.07 | 0.10 |
| Gpr81        | 0.01  | 0.01  | 0.07 | 0.09 |
| Sult1a1      | 0.20  | 0.44  | 0.07 | 0.13 |
| 1810011H11R  | 0.02  | 0.05  | 0.07 | 0.24 |
| Ttll6        | 0.04  | 0.05  | 0.07 | 0.11 |
| Ppic         | 0.02  | 0.08  | 0.07 | 0.27 |
| Gm694        | 0.05  | 0.08  | 0.07 | 0.20 |
| Gm3002       | 0.71  | 0.86  | 0.06 | 0.10 |
| Snhg11       | 15.18 | 25.16 | 0.06 | 0.11 |
| Miat         | 2.12  | 2.75  | 0.06 | 0.09 |
| E330033B04R  | 0.05  | 0.08  | 0.06 | 0.12 |
| AF251705     | 0.06  | 0.11  | 0.06 | 0.14 |
| B230206F22Ri | 0.69  | 1.08  | 0.06 | 0.10 |
| Rbpjl        | 0.01  | 0.02  | 0.06 | 0.15 |
| Cd52         | 0.11  | 0.24  | 0.06 | 0.12 |
| Nat2         | 0.05  | 0.09  | 0.06 | 0.12 |
| Lgals4       | 0.03  | 0.09  | 0.06 | 0.23 |
| Igf2         | 0.74  | 1.43  | 0.06 | 0.08 |
| D830029L11   | 0.10  | 0.14  | 0.06 | 0.09 |
| Neat1        | 1.78  | 2.79  | 0.06 | 0.09 |
| A630001G21R  | 0.01  | 0.02  | 0.05 | 0.10 |
| Slc39a2      | 0.02  | 0.06  | 0.05 | 0.23 |
| Fhl3         | 0.03  | 0.14  | 0.05 | 0.26 |
| Cd86         | 0.01  | 0.04  | 0.05 | 0.16 |
| Trem2        | 0.12  | 0.48  | 0.05 | 0.17 |
| Cd46         | 0.04  | 0.17  | 0.05 | 0.22 |

|             |       |       |      |      |
|-------------|-------|-------|------|------|
| Insl5       | 0.12  | 0.25  | 0.05 | 0.11 |
| Gm10790     | 0.02  | 0.07  | 0.04 | 0.18 |
| Malat1      | 0.77  | 1.21  | 0.04 | 0.07 |
| Tyrobp      | 0.47  | 1.09  | 0.04 | 0.10 |
| Xlr         | 0.03  | 0.10  | 0.04 | 0.16 |
| Crybb1      | 0.08  | 0.11  | 0.04 | 0.07 |
| Rpph1       | 0.11  | 0.24  | 0.04 | 0.07 |
| A930011012R | 0.80  | 1.41  | 0.04 | 0.07 |
| Meg3        | 13.59 | 21.45 | 0.04 | 0.06 |
| Gm3985      | 0.02  | 0.03  | 0.04 | 0.09 |
| Rnase1      | 0.03  | 0.10  | 0.04 | 0.23 |
| Inmt        | 0.04  | 0.17  | 0.03 | 0.15 |
| Cbr2        | 0.04  | 0.10  | 0.02 | 0.09 |
| Gm20594     | 4.40  | 8.77  | 0.02 | 0.04 |
| C030016D13R | 0.01  | 0.03  | 0.02 | 0.07 |
| Lrrc17      | 0.63  | 1.32  | 0.01 | 0.03 |
| Abhd12b     | 0.00  | 0.05  | 0.00 | 0.16 |
| Defb18      | 0.00  | 0.45  | 0.00 | 1.06 |
| Gm5741      | 0.00  | 0.00  | 0.00 | 0.00 |
| Gm17745     | 0.00  | 0.00  | 0.00 | 0.00 |
| Hist1h4k    | 0.00  | 0.13  | 0.00 | 0.17 |
| Mir344-2    | 0.00  | 0.00  | 0.00 | 0.00 |
| Mir3070a    | 0.00  | 1.69  | 0.00 | 0.25 |
| Mir3070b    | 0.00  | 4.10  | 0.00 | 0.13 |
| Mirlet7d    | 0.00  | 0.00  | 0.00 | 0.00 |
| Rnu12       | 0.00  | 0.00  | 0.00 | 0.00 |
| S100a7a     | 0.00  | 0.02  | 0.00 | 0.18 |
| S100a8      | 0.00  | 0.00  | 0.00 | 0.00 |
| S100a9      | 0.00  | 0.07  | 0.00 | 0.40 |
| Snora30     | 0.00  | 1.40  | 0.00 | 0.30 |
| Snord89     | 0.00  | 5.01  | 0.00 | 0.30 |
| Wfdc2       | 0.00  | 0.06  | 0.00 | 0.37 |
| Hist1h2ai   | 0.20  | 0.12  |      | 0.69 |
| Hist1h2ak   | 0.19  | 0.10  |      | 0.69 |
| Hist1h4b    | 0.69  | 0.70  |      | 1.96 |
| Hist2h3b    | 0.22  | 0.03  |      | 0.26 |
